# Supplementary material for: Gender differences in perceived stress and coping among college students
Source: PLoS One. 2021 Aug 12;16(8):e0255634. doi: 10.1371/journal.pone.0255634 (PMC8360537; doi:10.1371/journal.pone.0255634)
Supplement: S1 Dataset — (CSV) [file pone.0255634.s001.csv]

Term	type	sec	prepost	age	gender	level	PSShlth	PSS1	PSS2	PSS3	PSS4	PSS5	PSS6	PSS7	PSS8	PSS9	PSS10	PSS_Total	BC1	BC2	BC3	BC4	BC5	BC6	BC7	BC8	BC9	BC10	BC11	BC12	BC13	BC14	BC15	BC16	BC17	BC18	BC19	BC20	BC21	BC22	BC23	BC24	BC25	BC26	BC27	BC28	V48	V49	V50
Fall	1	1	2	20	2		1	2	0	2	3	4	4	4	3	2	1	25	2	3	1	1	1	1	3	1	3	1	1	4	1	4	4	1	4	4	3	3	1	2	1	2	2	1	2	3
Fall	1	1	2	20	2	3	1	0	0	1	4	4	0	4	4	1	0	18	1	4	1	1	4	1	4	1	1	1	1	4	1	2	4	1	4	1	4	4	4	4	1	4	4	1	4	1
Fall	1	1	2	21	2	4	1	3	2	2	4	3	2	2	2	2	2	24	1	1	1	1	2	1	1	1	1	2	1	1	2	1	2	1	2	1	1	1	1	1	1	1	1	1	1	1
Fall	1	1	2	20	1	3	1	1	0	2	2	4	2	3	3	0	1	18	3	3	1	1	3	1	2	1	1	2	1	2	1	3	3	1	3	2	2	1	2	1	2	3	3	1	1	2
Fall	1	1	2	21	2	4	1	4	3	4	2	2	1	1	2	4	1	24	3	4	2	1	3	3	4	2	3	4	1	3	3	4	3	2	4	4	4	3	3	4	4	4	4	2	3	2
Fall	1	1	2	25	2	4	1	2	0	0	0	1	0	0	1	1	1	6	1	1	1	1	2	1	1	1	1	2	1	1	1	2	1	1	1	1	1	1	1	1	1	1	1	1	1	2
Fall	1	1	2	22	2	4	1	2	2	2	3	3	1	2	3	2	2	22	2	3	2	1	2	1	4	2	3	2	1	4	2	3	3	1	4	4	3	3	3	4	3	3	3	3	3	4
Fall	1	1	2	20	2	3	1	4	4	4	3	2	2	2	2	3	4	30	4	4	3	1	3	1	4	4	2	4	1	3	1	4	4	1	4	2	4	4	1	4	4	2	4	1	4	1
Fall	1	1	2	22	1	4	1	2	1	3	4	2	0	4	2	2	2	22	2	2	1	1	1	1	2	1	1	1	1	2	2	2	1	1	2	1	2	3	1	1	1	2	2	1	1	2
Fall	1	1	2	25	2	4	1	2	1	2	4	4	1	4	3	2	1	24	2	4	1	2	4	2	4	1	3	4	2	3	1	2	4	1	4	3	4	4	3	4	4	3	2	1	4	4
Fall	1	1	2	21	2	3	1	2	2	2	4	3	2	3	3	0	0	21	2	3	2	1	2	1	4	1	3	2	1	4	1	4	3	1	4	4	4	4	3	2	2	4	4	1	2	1
Fall	1	1	2	24	2	3	1	2	2	2	4	2	2	4	2	1	2	23	2	3	1	2	2		4	1	4	2	2	4	2	3	2	1	4	3	2	4	2	4	2	2	2	2	3	1
Fall	1	1	2	22	2	4	1	1	1	2	3	3	1	3	3	1	1	19	2	2	1	2	3	1	3	1	2	2	2	4	1	3	3	1	3	3	2	3	2	2	2	3	3	2	3	3
Fall	1	1	2	21	2	4	1	2	1	3	3	2	2	3	3	2	1	22	4	2	1	1	1	1	3	1	1	4	1	4	3	3	1	1	4	4	4	4	3	4	2	2	3	1	3	3
Fall	1	1	2	20	2	3	1	2	2	3	2	2	2	4	3	1	3	24	3	3	1	1	2	1	4	1	1	4	1	4	3	3	3	1	4	1	3	1	2	3	3	1	3	2	2	1
Fall	1	1	2	21	2	4	2	3	1	3	3	2	1	3	2	1	1	20	4	3	1	2	2	1	1	1	1	1	2	3	2	1	1	1	4	3	4	4	2	4	1	4	1	2	4	1
Fall	1	1	2	20	2	2	1	3	3	2	4	2	1	2	3	3	2	25	4	4	1	1	4	1	4	1	1	4	1	4	1	3	3	1	3	3	3	1	3	3	3	1	2	1	4	3
Fall	1	1	2	22	1	4	1	2	1	3	1	2	2	1	3	3	1	19	1	1	1	1	1	1	3	1	1	2	1	1	2	2	2	1	2	2	1	1	2	2	1	1	2	1	1	2
Fall	1	1	2	23	2		1	3	3	4	3	3	3	3	3	3	3	31	4	4	2	1	2	2	3	2	1	2	1	2	3	3	2	2	3	2	4	2	2	1	1	1	2	2	2	1
Fall	1	1	2	23	1	4	1	4	1	4	3	2	4	2	2	3	2	27	4	2	4	1	2	1	2	4	2	3	1	2	3	3	3	1	2	1	4	4	2	1	2	2	2	2	3	1
Fall	1	1	2	30	2	3	2	1	1	2	4	4	2	3	4	2	1	24	2	4	1	1	2	2	3	1	2	2	1	3	3	4	3	2	3	4	3	4	2	2	2	4	4	3	2	3
Fall	1	1	2	20	1	2	1	3	2	4	3	2	2	2		3	2
Fall	1	1	2	20	1	2	1	3	3	4	2	1	3	3	2	2	4	27	3	2	1	2	3	1	3	1	2	3	1	2	4	4	3	1	3	2	2	3	3	2	4	3	3	3	1	2
Spri	1	1	2	23	2	4	2	3	4	4	0	2	3	4	3	3	4	30
Spri	1	1	2	23	2	3	1	3	3	3	3	1	2	2	1	3	3	24	4	4	2	4	3	2	4	3	4	1	4	3	4	4	3	2	4	4	3	4	4	2	2	1	2	4	3	4
Spri	1	1	2	24	1		1	2	1	3	3	2	1	3	2	2	1	20	3	2	1	1	2	3	3	2	1	2	1	3	2	3	2	2	3	3	3	3	1	2	2	3	3	1	2	1
Spri	1	1	2	21	1	4	1	3	2	3	4	4	2	3	3	1	1	26	4	4	1	1	4	1	4	1	1	4	1	4	1	4	3	1	4	2	4	2	1	4	4	1	4	1	4	1
Spri	1	1	2	18	2	4	1	1	1	1	1	1	1	1	1	1	1	10	3	3	1	2	1	1	1	1	1	2	2	4	3	1	2	2	3	3	4	1	1	1	2	3	1	2	2	3
Spri	1	1	2	24	1		1	2	2	2	3	3	1	2	3	2	1	21	2	4	1	1	1	1	4	1	1	2	1	3	3	4	1	1	3	4	3	4	2	2	2	3	3	2	2	3
Spri	1	1	2	18	2	1	1	1	1	2	3	3	1	3	3	2	1	20	2	4	1	2	1	1	2	1	1	3	1	2	2	2	2	1	4	4	3	2	1	2	2	2	2	2	1	3
Spri	1	1	2	20	1	2	1	3	2	1	2	3	2	1	3	1	2	20	2	3	2	1	1	4	3	2	1	2	1	2	4	3	2	2	1	4	2	1	1	2	1	4	3	2	3	4
Spri	1	1	2	20	2	2	1	0	1	1	4	3	4	3	3	2	0	21	3	4	1	3	1	1	4	1	1	1	3	3	2	4	1	1	1	2	3	4	4	1	1	4	4	1	4	4
Spri	1	1	2	22	2	4	1	2	1	3	4	3	2	4	3	2	3	27	4	4	3	1	4	2	3	3	2	4	1	3	2	3	3	2	3	3	4	4	2	4	4	4	3	2	4	2
Spri	1	1	2	21	1	3	1	0	1	1	4	4	0	3	3	1	1	18	3	3	1	1	2	1	4	1	2	3	1	3	2	3	3	1	3	3	3	4	3	3	3	3	3	2	3	3
Spri	1	1	2	21	2		1	2	1	2	1	3	1	1	2	2	2	17	2	2	1	2	3	1	3	1	2	3	2	3	2	3	3	1	2	1	3	2	2	3	2	3	3	3	3	1
Spri	1	1	2	22	1	2	1	0	0	1	4	4	0	3	2	0	0	14	1	4	1	1	2	1	4		1	2	1		1	2	2		3	1	1		2	4	2		3	1	3	1
Spri	1	1	2	22	1	4	1	1	2	1	3	3	1	3	3	1	1	19	1	3	1	2	2	1	2	1	1	1	1	2	2	2	1	1	2	1	1	2	2	1	2	2	2	2	1	1
Spri	1	1	2	18	2		1	4	3	4	2	0	3	2	2	4	3	27	4	4	1	2	2	1	4	1	2	2	2	4	4	4	2	2	1	4	1	4	2	3	1	4	4	4	4	2
Spri	1	1	2	22	2	4	1	2	1	2	4	2	0	4	4	2	1	22	4	4	1	1	3	1	4	1	1	1		4	2	4	3	1	4	1	2	4	1	4	3	3	4	2	4	1
Spri	1	1	2	25	2		1	3	3	4	4	3	2	2	4	2	3	30	4	2	1	1	2	1	3	2	1	3	1	4	2	3	3	1	4	2	3	3	1	1	2	2	3	1	1	1
Fall	2	5	2	22	2		1	2	2	4	1	3	4	3	2	3	3	27	4	4	2	4	4	1	4	1	2	4	2	2	2	2	2	1	2	2	2	2	3	2	2	2	2	2	1	1
Fall	2	5	2	20	1	2	1	1	0	2	4	2	1	3	1	0	1	15	3	2	1	1	3	1	3	1	1	1	1	2	3	3	2	3	3	1	4	2	2	2	1	3	2	2	4	2
Fall	2	5	2	19	1	2	1	3	2	2	1	3	2	1	3	3	1	21	3	2	1	4	2	1	2	1	2	1	4	4	3	3	2	3	3	2	3	2	3	3	2	2	2	2	2	1
Fall	2	5	2	19	2	2	1	1	2	3	3	3	1	3	3	1	2	22	2	4	1	1	2	1	4	1	3	2	1	3	1	3	2	1	4	3	2	2	1	1	2	2	2	2	2	2
Fall	2	5	2	20	2	2	1	3	3	4	3	1	2	2	1	4	3	26	4	3	1	1	2	3	3	1	4	2	1	3	2	2	1	1	2	4	4	3	3	3	2	3	4	2	3	4
Fall	2	5	2	20	2	2	1	2	1	4	2	2	2	2	2	3	3	23	2	2	2	1	2	2	4	2	2	4	1	4	3	3	4	1	4	3	4	4	2	4	4	2	3	2	4	4
Fall	2	5	2	22	1	4	1	2	2	3	4	1	0	1	2	3	0	18	4	4	2	1	3	1	4	1	4	2	1	4	2	3	4	1	4	2	4	4	1	1	4	2	4	2	3	3
Fall	2	5	2	22	2		1	1	1	2	3	3	1	3	3	1	1	19
Fall	2	5	2	22	2	4	1	2	2	3	3	3	1	3	2	3	2	24	3	2	2	2	3	2	3	1	2	3	2	3	3	3	3	1	3	4	3	3	3	2	3	2	2	3	2	3
Fall	2	5	2	24		4	1	1	1	2	4	4	1	2	3	1	1	20	2	2	1	1	3	1	3	1	1	2		3	1	2	2	1	3	1	1	4	2	2	2	3	2	1	2	3
Fall	2	1	2	27	2	4	1	2	3	3	2	2	2	2	1	1	2	20	4	4	1	1	2	2	3	1	2	2	1	4	3	3	2	2	3	1	3	3	2	1	2	3	3	2	2	1
Fall	2	1	2	21	2	4	1	1	0	2	4	3	0	3	3	1	0	17	2	3	1	1	2	1	2	1	1	2	1	3	2	1	2	1	2	2	3	2	3	2	2	3	2	1	2	1
Fall	2	1	2	21	2	3	1	0	0	2	3	3	1	2	3	1	1	16	2	2	1	1	1	3	1	2	2	1	1	3	2	1	1	1	2	1	1	2	1	1	3	2	3	1	1	1
Fall	2	1	2	20	2	3	1	2	0	2	4	3	1	4	3	0	0	19	2	2	1	1	1	1	2	1	1	1	1	2	2	1	2	1	1	1	3	1	1	1	3	1	1	1	1	1
Fall	2	1	2	18	2	3	1	3	3	4	2	2	2	2	3	4	4	29	4	3	1	1	4	2	3	1	2	4	1	4	4	4	4	1	3	3	3	3	3	2	4	3	4	4	2	3
Fall	2	1	2	21	2	4	1	3	2	3	3	2	2	3	3	3	4	28	4	4	1	1	3	1	4	1	1	3	1	4	2	4	3	1	2	2	3	4	3	1	3	3	4	2	1	2
Fall	2	1	2	20	1	3	1	0	1	2	4	3	2	1	4	2	3	22	3	4	1	1	1	1	2	1	1	3	1	1	3	3	1	1	4	4	1	4	1	1	3	3	1	1	1	4
Fall	2	1	2	21	2	4	1	2	3	4	2	1	1	1	2	2	4	22	1	2	1	2	2	1	2	1	2	2	1	2	3	3	2	1	2	3	2	1	2	3	2	2	2	2	3	1
Fall	2	1	2	18	2	1	1	1	1	2	4	4	1	4	4	1	1	23	4	3	1	1	2	1	2	1	1	1	1	2	1	2	1	1	2	1	4	1	1	1	1	1	1	1	2	1
Fall	2	1	2	21	2	4	1	2	3	2	3	2	0	2	2	3	2	21	4	3	1	1	1	1	3	1	1	2	1	2	1	3	1	1	2	1	3	1	1	3	3	1	2	1	2	1
Fall	2	1	2	27	2	4	1	2	2	3	2	2	2	3	2	0	2	20	4	4	4	4	1	1	2	2	1	2	1	2	1	2	3	2	2	4	4	4	2	1	1	4	4	4	1	1
Fall	2	1	2	21	2	3	1	1	1	2	3	2	1	1	2	2	1	16	3	3	1	2	2	1	3	1	1	2	1	2	3	3	2	1	3	2	3	4	2	1	2	3	3	1	2	3
Fall	2	1	2	19	2	2	1	2	1	2	3	3	2		2	2	2		4	2	1	1	1	1	1	1	1	1	1	2	2	1	1	1	2	4	4	1	1	1	1	1	1	1	4	4
Fall	2	1	2	19	2	2	1	1	3	4	3	2	2	3	3	2	2	25	4	3	2	1	3	1	3	2	2	2	1	4	1	2	2	1	2	2	4	4	4	4	2	4	4	2	4	1
Fall	2	3	2	26	1	4	1	1	1	2	4	2	1	3	3	1	0	18	3	3	1	1	2	1	4	1	1	3	1	3	2	4	3	1	2	4	3	2	1	3	3	2	3	1	4	3
Fall	2	3	2	20	2	3	1	3	3	3	3	2	2	3	2	3	2	26
Fall	2	3	2	25	2	4	1	2	1	2	4	3	2	4	4	3	1	26	4	4	2	1	4	1	4	4	1	4	1	4	3	4	4	1	4	3	4	2	3	2	4	4	4	3	3	2
Fall	2	3	2	21	2	4	1	2	2	4	3	2	3	2	1	2	2	23	1	4	2	2	2	1	4	2	3	2	2	4	3	2	2		1	3	3	3	3	4	1	4	3	1	4	2
Fall	2	3	2	20	2	3	1	3	1	3	2	3	1	3	3	1	2	22	3	3	1	1	2	1	3	1	2	3	1	3	2	3	3	1	3	1	3	2	2	2	3	2	3	1	3	2
Fall	2	3	2	19	2	2	1	2	3	4	1	2	4	1	1	2	3	23	3	2	1	1	2	1	3	1	2	2	1	3	2	3	2	1	3	2	3	2	2	3	2	2	2	3	3	2
Fall	2	3	2	20	2	2	1	1	0	1	3	3	0	4	3	0	0	15	1	1	1	1	1	1	1	1	1	1	1	2	2	2	1	1	1	1	1	1	2	1	1	1	1	2	1	1
Fall	2	3	2	20	2	3	1	3	2	4	0	0	4	0	1	4	4	22	4	2	4	3	2	2	3	2	3	3	3	2	3	3	3	2	3	3	3	2	3	1	3	2	2	3	1	2
Fall	2	3	2	20	2	4	1	4	4	4	3	3	2	2	2	2	3	29	2	3	1	2	2	2	3	1	2	2	2	4	2	3	3	2	3	3	4	4	3	2	2	3	3	2	1	2
Fall	2	3	2	22	2	4	1	2	2	2	3	3	1	2	2	1	1	19	4	2	2	1	4	2	3	2	3	3	1	2	2	3	3	1	3	2	4	3	2	2	3	3	2	1	2	1
Fall	2	3	2	18	2	2	1	2	2	4	3	2	3	2	2	2	3	25	3	3	1	1	3	1	3	1	1	3	1	3	2	3	3	1	3	3	3	3	3	4	3	3	3	2	4	1
Fall	2	3	2	22	2	3	1	3	3	3	2	2	2	1	2	3	3	24	2	2	1	2	1	2	2	1	1	1	2	2	3	2	1	1	1	1	4	1	3	1	1	2	1	2	1	1
Fall	2	3	2	19	2	2	1	2	0	2	4	4	2	4	4	2	1	25	4	3	1	1	3	1	4	1	3	3	1	4	1	4	3	1	4	1	2	4	2	1	2	3	4	2	3	1
Fall	2	3	2	19	2	2	1	1	1	2	3	2	1	3	3	1	1	18	2	2	1	1	2	1	2	1	1	3	1	2	1	2	3	1	3	3	2	2	2	1	2	2	1	1	1	1
Fall	2	3	2	21	2		1	2	3	3	1	1	2	3	1	1	3	20	2	3	1	1	2	3	2	1	2	3	1	4	4	2	3	1	3	3	4	4	3	2	2	2	4	3	1	2
Fall	2	3	2	20	2	3	1	2	3	2	2	2	1	3	2	1	1	19	2	1	1	1	2	1	2	1	2	3	1	3	2	3	3	1	3	2	3	2	2	3	3	3	1	1	2	1
Fall	2	3	2	24	2	3	1	2	1	2	4	3	1	3	3	1	1	21	1	3	1	1	1	1	3	1	1	1	1	1	1	2	1	1	4	1	1	4	1	1	1	3	3	1	1	1
Fall	2	3	2	19	2	2	1	4	4	4	4	2	4	2	4	3	4	35	4	4	1	1	3	3	2	2	1	4	1	4	4	4	4	4	4	4	4	4	4	1	4	4	4	4	4	4
Fall	2	3	2	20	2	3	1	1	1	4	4	4	1	4		1	2		3	2	1	1	2	2	3	1	2	2	1	2	3	3	2	2	3	2	3	2	2	1	2	1	1	1	1	1
Spri	2	1	2	28	2	4	1	2	2	2	3	1	2	2	2	2	2	20	3	4	4	1	2	2	4	4	4	2	1	4	2	4	2	2	3	4	3	2	3	4	2	3	4	3	4	2
Spri	2	1	2	18	2	1	1	2	2	2	2	2	2	2	2	2	2	20	4	4	3	4	2	2	3	4	4	3	2	1	2	3	3	3	3	3	3	3	2	2	2	3	3	3	2	3
Spri	2	1	2	23	2	3	1	2	3	3	3	2	3	3	0	2	4	25	4	4	4	4	4	3	4	2	3	3	4	3	3	4	2	2	1	3	3	3	3	1	3	3	4	4	2	1
Spri	2	1	2	21	1	4	1	2	0	2	4	4	1	3	4	1	1	22	4	4	1	1	3	1	4	1	1	3	1	4	1	4	4	1	4	2	4	2	1	3	4	2	3	1	4	2
Spri	2	1	2	18	1	1	1	2	2	3	4	2	1	3	2	2	1	22	3	2	1	3	1	1	3	1	1	1	3	2	4	2	1	1	3	4	3	4	1	1	1	4	2	4	1	3
Spri	2	1	2	19	2	2	1	0	0	1	4	4	1	4	4	2	1	21	1	3	1	1	4	1	4	1	1	4	1	4	1	3	4	1	4	3	4	4	3	2	2	4	3	1	2	3
Spri	2	1	2	21	2	4	1	2	1	3	2	3	3	3	3	1	1	22	3	3	1	2	4	1	3	1	2	4	1	4	2	4	4	1	4	3	2	4	2	4	4	4	4	2	4	2
Spri	2	1	2	19	2	1	1	3	2	4	2	2	1	2	3	4	1	24	3	3	2	3	3	3	3	1	2	3	3	2	2	3	3	1	3	4	3	3	3	1	3	2	3	2	2	4
Spri	2	1	2	21	2	3	1	4	2	3	3	2	3	3	3	3	3	29	3	2	4	2	1	3	3		2	1	2	3	2	2	3	1	4	2		2	1	3	4	2	3	2	4	1
Spri	2	1	2		2	3	1	1	0	1	3	4	0	3	3	0	0	15	1	2	1	1	3	1	3	1	1	3	1	2	1	1	3	1	3	3	2	2	2	2	2	2	2	1	3	4
Spri	2	1	2	20	2	4	1	1	1	2	3		1	3	3	2	2		3	3	1	3	2	2	3	1	3	3	2	3	2	3	3	1	3	3	4	2	3	2	3	3	3	2	2	2
Spri	2	2	2	22	2		2	1	2	3	3	4	3	3	3	3	4	29
Spri	2	2	2	19	2	1	1	1	2	1	3	3	1	3	4	2	2	22	3	3	1	1	4	1	2	1	1	4	1	3	2	3	4	1	2	1	3	2	1	2	3	2	1	2	2	1
Spri	2	2	2	19	1	1	1	0	0	2	4	4	0	4	3	2	2	21	1	3	2	1	1	1	2	3	3	1	2	3	3	1	2	1	2	1	3	3	2	2	2	2	2	2	4	3
Spri	2	2	2	18	2	1	1	3	3	3	4	3	2	3	4		2		4	2	3	1	1	3	2	3	2	3	2	3	3	3	3	3	3	2	2	4	1	1	3	4	4	4	4	4
Spri	2	2	2	23	1	4	1	2	2	3	3	3	2	3	3	2	2	25	2	2	1	2	3	1	3	2	1	3	2	2	3	3	3	1	3	2	2	2	3	4	2	3	3	2	4	2
Spri	2	2	2	26	2	4	1	3	2	4	2	2	4	2	3	4	2	28	3	3	2	2	1	3	4	1	2	1	2	3	3	3	2	2	3	2	3	2	2	3	1	2	4	3	3	2
Spri	2	2	2	22	2	4	1	3	1	4	4	4	0	4	4	2	2	28	4	3	1	1	2	1	4	1	1	2	1	3	3	3	2	2	3	1	2	3	1	3	2	3	4	3	3	1
Spri	2	2	2	21	2	3	1	2	1	2	2	3	2	2	2	2	3	21	2	2	1	1	3	2	2	1	1	3	1	3	2	3	3	2	3	2	2	2	3	4	3	2	2	2	3	1
Spri	2	2	2	19	1	1	1	2	2	2	3	3	2	2	3	2	2	23	2	3	1	1	2	2	3	2	2	2	1	3	3	2	2	2	3	2	3	2	2	1	2	2	2	2	1	2
Spri	2	2	2	22	2	4	1	1	1	1	3	3	3	3	3	1	1	20	1	2	1	1	1	1	1	1	1	1	1	1	1	1	1	1	1	1	1	1	1	1	1	1	1	1	1	1
Spri	2	2	2	19	1	1	1	3	2	2	3	3	1	4	3	0	4	25	4	4	1	1	1	4	4	4	4	1	1	4	1	4	2	2	3	3	4	3	1	2	4	3	4	3	3	2
Spri	2	2	2	24	1	3	1	0	0	1		2	1	1	1	0	0			3	2	1	2	1	3	1	2	2	1	3	1	2	2	2	3	2	2	3	1	1	2	3	2	1	1	1
Spri	2	2	2	24	2	4	1	3	4	3	4	3	2	3	2	2	2	28	2	2	1	1	3	2	3	1	1	3	1	4	2	3	3	1	4	1	4	4	4	4	4	4	4	3	3	1
Spri	2	2	2	18	2	1	1	2	1	2	1	3	1	4	3	2	1	20	1	2	1	1	2	1	3	1	3	2	1	3	1	2	2	1	3	3	2	2	2	2	2	2	1	1	2	3
Spri	2	2	2	20	1	2	1	0	0	0	0	3	0	3	3	0	0	9	4	4	2	1	2	1	4	1	2	2	1	4	2	3	1	1	3	2	3	3	1	4	2	2	3	1	4	3
Spri	2	2	2	21	2	4	1	2	3	3	2	1	0	2	3	1	1	18	3	3	1	1	3	1	3	1	2	3	1	3	3	3	3	1	2	1	3	4	2	3	3	2	3	3	3	1
Spri	2	2	2	20	2	4	1	1	2	2	4	3	1	4	3	3	1	24	2	2	1	1	3	1	2	1	1	3	1	1	4	3	2	1	1	3	3	1	1	1	2	3	3	2	1	2
Spri	2	2	2	20	2	2	1	2	1	2	3	3	1	3	4	1	1	21	4	3	1	1	1	1	3	1	2	1	1	4	2	3	2	1	4	2	3	2	2	4	2	3	3	1	4	2
Spri	2	2	2	19	2	1	1	2	2	1	1	4	1	3	4	1	1	20	2	2	1	1	3	1	3	1	2	3	1	3	1	2	3	1	3	2	2	3	2	4	3	3	3	1	4	2
Spri	2	2	2	20	1	2	1	2	2	2	3	1	3	3	4	2	2	24	4	3	1	1	2	3	3	2	3	2	1	3	3	2	2	1	3	3	3	2	3	1	2	2	3	3	1	3
Spri	2	2	2	19	2		1	1	0	3	3	2	1	3	4	2	1	20	3	2	1	1	1	1	3	1	1	1	1	4	1	2	2	1	4	2	2	1	1	1	1	2	1	1	2	1
Spri	2	2	2	23	2	3	1	1	1	3	2	3	1	2	4	1	2	20
Spri	2	2	2	26	1	2	1	1	2	2	1	3	2	2	2	2	2	19
Spri	2	2	2	20	2		1	1	2	3	4	2	0	3	3	2	2	22	3	3	1	1	2	1	3	1	2	2	1	3	1	4	2	1	3	1	4	3	2	3	3	4	2	1	4	1
Spri	2	2	2	24	2	4	1	2	3	3	2	1	2	1	2	2	3	21	4	2	1	1	3	1	3	1	1	3	1	1	4	2	4	1	2	1	4	1	3	3	3	2	2	1	2	1
Spri	2	4	2	19	1	2	2	2	2	2	3	2	1	2	1	2	2	19	2	2	1	1	1	1	4	1	1	2	1	3	3	3	2	1	2	1	2	1	1	1	1	1	2	1	1	1
Spri	2	4	2	20	2	4	2	2	1	3	2	3	2	2	2	1	3	21	2	3	1	1	2	1	3	1	1	2	1	3	2	3	2	2	3	3	3	2	2	2	2	2	3	3	2	2
Spri	2	4	2	21	1	3	1	2	1	3	1	2	1	1	2	2	2	17	2	1	1	1	1	1	2	1	1	1	1	1	1	1	3	2	2	1	1	3	3	2	2	1	1	1	3	2
Spri	2	4	2	20	2	2	2	3	3	4	2	1	2	1	1	2	2	21	3	3	3	1	1	2	3	1	1	1	1	3	2	3	1	2	4	2	4	3	2	3	2	3	3	2	1	2
Spri	2	4	2	19	1	1	1	0	0	1	3	4	2	0	0	2	4	16	2	4	4	1	1	1	4	1	1	1	1	4	4	4	1	4	4	1	4	4	1	4	1	1	2	4	4	1
Spri	2	4	2	21	2		1	2	1	2	4	3	1	3	3	1	1	21	2	3	1	1	2	1	4	1	2	3	1	4	2	3	2	1	4	2	3	3	2	2	2	3	3	2	3	2
Spri	2	4	2	21	2	4	1	2	1	3	4	4	0	4	4	1	0	23	2	4	1	1	2	1	3	1	1	2	1	4	1	3	2	1	4	2	3	2	2	1	2	2	2	1	1	2
Spri	2	4	2	19	1	1	1	1	0	2	3	3	1	3	3	1	1	18	4	3	1	1	1	1	3	1	1	3	1	4	4	4	4	1	4	4	4	3	1	1	1	4	4	1	1	3
Spri	2	4	2	19	1		1	2	1	2	3	3	1	3	3	1	1	20	3	3	2	1	3	1	3	1	1	3	1	1	1	3	3	1	3	1	2	3	3	3	3	3	3	1	2	1
Spri	2	4	2	19	2	2	1	2	3	2	3	3	1	2		2	1		3	3	1	2	4	1	3	1	4	3	1	3	2	4	4	1	4	2	3	4	4	4	4	4	3	1	2	2
Spri	2	4	2	20	2	2	1	1	1	3	4	4	2	4	4	3	1	27	4	4	1	1	4	2	4	1	1	4	1	4	1	4	2	1	4	4	4	2	4	4	4	4	4	1	4	2
Spri	2	4	2	20	2	2	1	3	2	4	1	2	3		2	1	2		3	3	1	1	2	1	2	1	1	3	1	2	2	2	2	1	3	1	3	3	1	1	2	1	2	4	2	1
Spri	2	4	2	23	2	4	1	4	4	4	0	0	4	1	1	4	4	26	2	4	1	3	3	1	4	1	1	3	3	4	4	4	4	1	3	4	4	3	4	2	2	4	4	4	3
Spri	2	4	2	19	1	1	1	2	0	1	4	1	2	3	2	3	2	20	4	2	4	1	2	2	1	2	4	3	1	4	4	3		1	4	2	2	3	2	2	2	2	3	4	2	2
Spri	2	4	2	21	2	2	1	0	0	0	0	4	0	0	4	0	0	8	1	1	1	1	1	1	1	1	1	1	1	1	1	1	1	1	1	1	1	1	1	1	1	1	1	1	1	1
Spri	2	4	2	26	1		1	2	1	2	3	2	2	2	3	2	2	21	2	2	1	1	1	1	3	1	1	1	1	1	1	2	2	1	1	2	2	3	1	1	1	1	1	1	3	1
Spri	2	4	2	20	2	2	1	2	2	3	3	2	2	3	3	3	3	26	4	3	2	1	1	1	3	2	1	1	1	3	3	2	1	1	3	4	4	3	2	1	1	2	2	2	2	4
Spri	2	4	2	19	1		1	0	0	0	4	4	0	4	4	0	0	16	4	4	1	1	4	1	4	1	1	4	1	4	4	4	4	1	4	4	4	4	1	4	4	4	4	1	4	1
Spri	2	4	2	20	2	2	1	2	2	2	3	3	1	3	2	0	3	21	2	2	1	1	3	1	2	1		4	1	3	3	2	3	1	3	1	3	2	1	4	4	3	2	2	4	1
Spri	2	4	2	19	2		1	1	2	4	3	3	2	3	2	3	3	26	4	4	2	1	4	2	3	2	2	4	1	3	3	3	4	1	2	2	4	2	2	2	4	3	3	2	2	2
Spri	2	4	2	20	2	2	1	2	2	3	4	4	2	4	3	2	1	27	2	4	1	1	1	1	4	1	2	1	1	2	2	4	1	1	3	1	3	1	1	1	1	1	4	2	1	1
Spri	2	4	2	19	2	2	1	3	2	2	4	3	2	3	3	1	2	25	4	2	4	1	2	3	2	2	3	3	1	3	3	2	2	3	4	4	3	2	3	3	3	2	3	3	1	2
Spri	2	4	2	20	2	3	1	2	1	4	2	2	3	2	2	3	1	22	4	1	1	1	2	1	2	1	2	2	1	3	3	2	3	1	4	1	4	3	2	4	2	2	4	4	1	1
Spri	2	4	2	23	2	4	1	2	2	3	3	3	2	2	4	0	3	24	3	4	1	1	2	1	4	1	2	2	1	4	4	4	2	1	4	4	4	4	1	1	2	4	4	2	1	4
Spri	2	4	2	20	2	2	1	3	3	4	1	0	1	2	1	4	3	22	2	3	2	1	3	3	3	3	3	2	1	2	3	2	3	3	4	3	3	2	3	1	2	3	1	3	1	3
Spri	2	4	2	20	2	2	1	1	1	3	3	3	1	2	3	1	0	18	3	3	1	1	2	1	3	1	1	4	1	3	2	3	4	1	4	1	4	1	1	2	4	3	3	1	2	1
Spri	2	4	2	20	2	2	1	4	4	4	4	2	2	2	3	4	2	31	3	3	2	2	1	1	2	1	1	1	1	1	1	1	2	1	2	1	3	2	1	1	1	4	1	1	1	1
Spri	2	4	2	19	2	1	1	3	3	3	3	2	3	2	2	2	3	26
Spri	2	4	2	19	2	1	1	1	0	2	3	3	0	3	4	1	0	17	1	1	1	1	1	1	1	1	1	1	1	1	2	1	2	1	1	1	1	3	1	2	1	3	2	1	2	1
Fall	3	6	2	19	1	1	1	2	2	2	3	3	2	4	3	2	1	24	3	4	1	1	2	1	4	1	1	1	1	3	3	3	4	1	3	3	3	4	1	2	1	4	3	1	2	2
Fall	3	6	2	19	1	2	1	1	1	2	2	2	2	2	2	2	2	18	3	3	1	1	1	1	2	1	1	1	1	2	2	3	1	1	2	1	2	2	1	1	1	2	2	2	1	1
Fall	3	6	2	20	2	2	1	2	1	3	2	3	2	2	3	2	2	22	2	4	2	1	3	2	4	2	1	2	1	4	3	3	3	2	3	2	2	2	1	2	2	3	4	2	4	2
Fall	3	6	2	18	2	1	1	3	4	4	2	1	4	2	0	3	4	27	2	3	3	2	3	1	2	1	4	3	2	2	2	4	4	1	2	1	4	2	4	1	4	3	2	1	1	1
Fall	3	6	2	22	2	4	1	1	3	4	2	2	4	2	1	4	2	25
Fall	3	6	2	18	1	1	1	1	1	3	4	4	2	2	4	2	2	25	2	4	1	2	1	1	4	2	1	2	2	4	1	4	2	1	4	3	2	4	2	4	2	4	4	1	2	2
Fall	3	6	2	19	2	2	1	2	2	2	3	2	1	1	3	1	1	18	3	3	1	1	2	3	3	1	1	3	1	3	2	3	3	1	3	1	2	3	2	3	3	3	3	2	3	1
Fall	3	6	2	21	2	3	1	2	4	4	3	2	1	2	2	4	3	27	3	4	4	1	4	2	3	2	4	4	1	4	3	3	4	2	4	4	4	4	2	3	3	4	4	2	3	3
Fall	3	6	2	19	2		1	3	4	4	2	2	4	2	1	2	4	28	3	1	2	4	3	4	2	1	1	2	3	2	4	2	3	4	2	1	4	4	2	1	1	2	2	4	1	1
Fall	3	6	2	19	2	2	1	4	4	4	2	1	2	2	2	4	3	28	3	3	1	1	1	1	3	1	1	1	1	4	4	3	1	1	3	2	2	4	1	1	1	3	4	4	1	1
Fall	3	6	2	18	2	1	1	2	3	4	2	2	3	2	2	4	4	28	3	1	2	4	2	2	2	2	3	3	3	2	1	1	3	2	3	4	4	2	4	1	2	3	1	1	1	3
Fall	3	6	2	18	2	1	1	4	4	4	3	1	3	2	3	4	4	32	4	4	1	1	4	1	4	1	4	4	1	4	4	4	4	2	4	1	4	4	2	1	4	1	4	2	1	1
Fall	3	6	2	30	2		1	1	2	3	3	1	3	2	2	1	3	21	2	3	1	1	3	2	3	1	3	4	1	3	2	3	3	1	3	4	3	3	3	2	3	3	3	2	2	4
Fall	3	6	2	19	2	2	1	4	4	4	3	2	2	2	1	3	3	28	3	3	4	3	1	2	2	3	2	2	2	2	3	2	2	1	2	2	2	2	2	2	2	2	2	2	1	2
Fall	3	6	2	20	1	3	1	0	1	3	4	4	1	3	3	1	1	21	3	4	1	2	4	1	4	1	1	4	2	4	4	4	4	1	4	4	3	4	1	2	4	4	4	2	1	1
Fall	3	6	2	19	1	2	1	3	2	3	2	2	2	2	2	3	3	24	3	2	4	3	2	2	3	3	2	2	3	2	4	2	3	2	3	4	3	3	3	2	3	2	2	3	1	3
Fall	3	6	2	23	1	3	1	2	0	1	4	4	0	0	3	1	0	15	4	4	1	1	3	1	4	1	1	4	1	4	1	4	4	1	4	3	3	3	1	2	4	4	4	3	3	3
Fall	3	6	2	18	2	1	1	3	2	4	3	1	2	1	1	2	2	21	3	3	1	1	3	2	3	2	3	4	1	4	3	3	3	2	4	4	4	3	2	1	4	3	3	2	1	3
Fall	3	6	2	19	1	2	1	3	4	4	3	2	2	3	3	3	4	31	4	4	1	1	4	4	3	2	4	4	1	4	4	4	4	2	3	3	4	4	3	3	4	4	4	4	4	4
Fall	3	6	2	18	2	1	1	3	3	4	3	2	4	3	2	4	4	32	3	4	2	2	2	1	4	2	3	4	2	4	1	3	4	2	4	4	4	4	2	1	4	4	4	2	1	4
Fall	3	6	2	19	2	2	1	4	3	4	1	1	4	2	1	3	4	27	2	1	4	3	2	4	1	4	2	2	2	2	3	1	2	4	2	1	3	1	2	2	2	2	1	4	2	1
Fall	3	6	2	18	2	1	1	3	2	4	2	2	2	3	3	4	4	29	3	2	2	1	3	1	3	1	3	3	1	4	2	3	2	1	3	3	3	3	3	4	4	3	3	2	4	2
Fall	3	6	2	21	1	3	1	2	2	3	4	2	0	2	3	1	0	19	4	3	1	1	1	1	3	1	1	2	1	2	2	4	1	1	3	2	4	4	2	2	2	3	4	1	1	2
Fall	3	1	2	21	2		1	1	3	3	3	2	0	3	2	2	3	22	4	3	1	1	1	1	4	1	1	4	1	4	1	4	3	3	4	2	1	4	2	1	4	3	4	3	4	1
Fall	3	1	2	18	2	1	1	4	3	3	2	2	3	2	2	3	3	27	3	3	2	1	2	3	3	2	2	2	1	2	4	3	2	3	3	4	3	3	4	1	2	3	3	4	1	2
Fall	3	1	2	18	2	1	1	3	2	4	3	3	2	1	2	2	2	24	3	4	1	1	3	1	3	1	2	4	1	3	2	3	3	1	3	1	2	3	2	2	2	3	3	2	3	1
Fall	3	1	2	19	2	2	1	0	0	0	4	4	0	4	4	0	0	16	1	4	1	1	1	1	4	1	1	1	1	4	1	4	3	1	4	1	1	4	1	3	2	1	2	1	3	1
Fall	3	1	2		2	4	1	3	4	4	3	1	3	3	1	3	3	28	3	3	3	1	4	3	2	3	3	4	1	3	3	2	4	2	3	3	4	3	3	4	4	3	2	3	4	3
Fall	3	1	2	22	1	4	1	1	1	3	2	2	3	1	3	2	1	19	2	1	3	1	2	3	4	2	1	3	4	1	1	1	1	1	2	4	3	1	1	1	1	3	4	1	1	1
Fall	3	1	2	19	2	3	1	1	3	4	4	3	1	3	3	2	1	25	3	3	1	1	2	1	4	1	1	1	1	3	1	2	2	1	3	3	4	4	1	4	3	4	3	1	3	3
Fall	3	1	2	19	2	2	1	2	2	4	3	2	3	3	3	3	3	28	3	3	2	1	3	2	3	1	2	3	2	3	4	3	2	1	3	3	4	3	2	3	3	3	3	2	3	3
Fall	3	1	2	19	2	2	1	3	3	3	4	3	2	2	3	2	2	27	3	3	2	3	2	1	3	1	1	2	3	2	2	4	2	1	3	4	3	3	2	1	2	3	3	2	1	4
Fall	3	1	2	18	2	1	1	2	1	3	4	2	2	3	3	2	2	24	2	4	1	2	3	2	4	2	4	3	2	4	3	4	4	3	3	2	3	3	1	1	2	3	3	3	1	1
Fall	3	1	2	20	2	2	1	4	3	4	1	2	3	1	1	2	4	25	1	2	1	1	4	1	2	2	4	4	1	2	4	3	4	2	2	4	4	4	4	4	4	2	3	3	4	4
Fall	3	1	2	19	2	1	1	0	0	0	4	4	0	4	4	0	0	16	1	4	4	1	4	1	4	1	4	4	1	4	1	4	4	1	4	1	1	4	1	4	4	1	4	1	4	1
Fall	3	1	2	20	1	3	1	0	0	0	4	3	0	4	4	1	2	18	3	3	1	1	1	1	3	1	1	2	1	2	1	4	1	2	3	1	3	4	1	1	3	4	2	1	1	1
Fall	3	1	2		2		1	3	1	3	3	2	2	2	3	3	2	24	3	3	1	1	2	1	4	1	2	2	1	4	2	3	2	1	4	3	3	3	2	4	2	4	3	4	4	1
Fall	3	1	2	18	2	1	1	3	2	4	2	1		2	2	3	1		3	3	1	1	2	2	2	1	1	3	1	3	2	3	3	3	3	3	3	3	2	3	3	3	3	3	3	2
Fall	3	1	2	18	2	2	1	1	1	2	3	3	1	2	3	2	2	20	2	3	1	1	2	1	3	1	2	2	1	2	2	3	2	1	2	1	2	4	2	4	3	4	3	2	3	1
Fall	3	1	2	23	2	3	1	2	1	2	3	3	1	3	4	1	0	20	4	4	1	4	4	1	4	1	1	4	1	4	1	4	4	1	4	1	4	4	4	4	4	4	4	1	4	1
Fall	3	1	2	19	2	2	1	3	1	2	3	3	2	2	3	1	1	21	3	2	1	1	2	2	4	1	1	2	1	3	1	3	4	1	3	2	4	3	1	2	3	3	3	1	2	3
Fall	3	1	2	19	1	1	1	2	1	1	3	3	0	2	3	2	1	18	2	1	1	1	2	3	1	1	1	2	1	2	1	3	2	1	3	2	2	3	2	2	2	2	3	3	2	1
Fall	3	1	2	22	2	4	1	3	3	3	2	2	3	2	2	3	3	26	3	3	1	1	2	2	3	1	2	2	1	2	3	3	3	1	3	3	3	3	2	3	2	3	3	3	2	3
Fall	3	1	2	18	1	1	1	3	3	3	2	2	1	3	2	3	3	25	3	2	2	2	1	1	3	1	1	2	2	1	1	1	1	1	3	1	4	3	1	1	2	4	2	1	1	1
Fall	3	1	2	20	2		1	2	2	1	2	3	1	3	3	2	1	20	4	2	1	1	3	2	2	1	2	2	1	2	3	3	2	2	3	1	3	3	2	1	2	3	3	2	1	1
Fall	3	1	2	18	2	1	1	3	2	3	2	2	3	2	2	3	2	24	4	2	2	2	2	2	2	2	2	2	2	3	2	3	3	2	3	3	3	3	2	1	2	3	3	3	1	3
Fall	3	1	2				.												1	1	1	1	3	1	3	1	3	3	1	4	1	3	3	1	4	3	2	4	1	3	2	4	3	1	3	1
Fall	3	1	2	19	2		1	2	4	4	3	2	4	3	2	2	4	30	3	3	2	1	3	4	3	2	4	3	1		3	3	2	3	1	4	4	4	3	3	2	3	3	2	3	4
Fall	3	1	2	19	1		1	2	2	3	3	2	1	3	3	2	1	22	2	3	1	1	4	1	4	1	2	4	1	4	2	3	4	1	4	2	3	3	2	2	4	2	4	1	4	2
Fall	3	1	2	18	1	1	1	2	2	2	2	2	2	2	2	2	2	20	4	4	4	4	4	4	4	4	4	4	4	4	4	4	4	4	4	4	4	4	4	4	4	4	4	4	4	4
Fall	3	1	2	20	1	3	1	1	0	3	2	3	0	4	2	2	2	19	4	3	1	1	3	1	4	1	2	3	1	4	3	4	3	1	4	3	2	4	2	4	2	4	3	1	3	3
Fall	3	1	2	18	1		1	1	1	1	3	3		2	3	1	0		2	3	2	2	1	1	3	2	1	1	2	2	1	3	1	1	2	2	2	2	1	2	1	2	1	1	4	1
Fall	3	1	2	18	2	1	1	3	3	3	2	2	1	3	2	3	2	24	3	3	1	1	3	1	4	1	3	4	1	2	2	4	4	2	4	2	3	2	2	2	3	2	4	2	2	2
Fall	3	9	2	20	1	2	1	0	1	3	2	1	3	2	2	1	3	18	2	2	1	1	1	2	3	1	1	1	1	2	3	3	1	1	1	1	1	3	1	1	1	3	1	3	2	1
Fall	3	9	2	20	1	2	1	2	1	2	2	2	2	2	2	2	2	19	3	3	1	3	2	1	2	1	1	2	3	1	1	2	1	1	2	2	2	2	1	1	2	2	2	2	1	2
Fall	3	9	2	19	1	1	1	1	1	2	3	2	1	3	2	1	1	17	3	2	1	1	2	1	3	1	2	3	1	3	2	2	3	1	2	3	3	3	3	2	2	3	2	1	2	3
Fall	3	9	2	19	1	2	1	1	2	2	1	3	2	2	1	1	3	18	1	2	1	1	2	2	2	3	2	3	2	2	3	1	1	2	2	2	2	2	3	1	3	1	1	2	2	3
Fall	3	9	2	19	2	2	1	2	1	4	3	3	1	3	3	1	1	22	4	4	1	2	2	1	4	1	3	2	2	4	2	4	4	1	4	2	4	4	2	4	2	4	4	1	4	2
Fall	3	9	2	19	2	2	2	3	3	4	1	1	4	1	2	1	4	24	1	3	3	1	3	2	4	1	3	3	1	2	2	4	4	1	3	1	1	2	3	3	4	2	4	3	1	1
Fall	3	9	2	18	1	1	1	1	1	2	3	3	0	4	3	1	0	18	1	3	1	1	1	1	4	1	1	2	1	2	2	4	2	1	2	2	2	4	2	3	2	2	3	2	3	1
Fall	3	9	2	21	2	4	1	1	2	4	3	3	1	3	2	3	2	24	1	4	3	3	4	1	4	2	1	4	2	4	3	4	4	1	4	2	3	4	2	1	4	4	3	3	1	1
Fall	3	9	2	19	2	2	1	2	1	3	3	3	1	2	3	2	2	22	4	3	1	1	2	1	4	1	1	4	1	3	3	3	4	1	3	2	3	4	2	2	4	4	4	3	2	2
Fall	3	9	2	18	2	1	1	4	3	4	3	2	2	2	3	3	2	28	3	4	1	1	4	1	3	1	3	4	1	3	4	4	4	1	3	4	3	4	3	3	4	3	3	3	3	3
Fall	3	9	2	18	1	1	1	2	1	2	2	3	1	3	3	2	2	21	1	4	1	1	2	1	3	1	1	1	1	2	3	3	1	1	3	3	1	1	1	2	1	3	3	1	2	1
Fall	3	9	2	19	1	1	1	3	3	1	4	3	3	2	2	4	3	28	1	3	1	1	2	1	3	2	4	3	1	4	4	4	3	1	4	4	4	3	4	2	2	2	3	3	3	4
Fall	3	9	2	18	2	1	2	1	1	2	3	2	2	3	1	1	2	18	1	2	1	1	4	1	3	1	2	4	1	2	2	2	4	2	3	2	3	2	2	4	4	3	3	2	4	2
Fall	3	9	2	22	2		1	1	1	2	3	3	0	4	2	0	0	16	3	3	1	1	3	2	3	2	2	3	1	3	2	4	4	3	4	4	3	3	2	4	2	3	2	2	1	3
Fall	3	9	2	20	1	2	1	1	0	1	4	3	0	4	3	1	1	18	4	3	2	1	3	1	3	2	2	3	1	4	2	3	3	1	4	3	4	3	1	3	3	3	3	1	4	3
Fall	3	9	2	18	1	1	1	1	1	2		3	1	3	3	3	1		2	3	1	1	2	2	3	1	3	2	1	3	3	3	3	2	4	3	3	2	2	2	2	3	2	2	2	3
Fall	3	9	2	20	2	2	1	1	1	3	1	1		1	3	3	2		3	4	2	2	3	1	4	1	1	2	2	4	4	4	4	1	3	3	3	3	2	4	3	2	4	3	4	1
Fall	3	9	2	22	2		2	2	3	3	3	0	1	0	0	3	1	16	1	1	1	1	1	2	1	2	1	1	1	1	1	1	1	1	1	1	1	1	1	1	1	1	1	1	1	1
Fall	3	9	2	18	2	1	1	2	2	4	3	2	2	3	3	4	2	27	4	3	1	3	4	2	3	1	2	3	2	4	2	3	3	1	4	2	4	4	3	4	3	4	4	2	4	1
Fall	3	9	2	19	1	2	1	2	1	3	3	2	1	2	3	1	1	19	3	2	1	1	1	1	1	1	1	1	1	1	1	1	1	1	2	1	1	1	1	2	1	1	1	1	2	1
Fall	3	9	2	21	2	4	1	2	3	4	4	3	3	2	4	2	3	30	1		1	1	1	1	1	1	1	1	1	2	1	3	1	1	2	1	1	1	1	1	1	4	3	1	4	1
Fall	3	9	2	18	2	1	1	3	2	2	4	3	1	2	3	2	1	23	3	3	1	1	2	1	3	1	2	2	1	3	2	3	2	1	3	4	2	3	2	3	3	3	3	2	3	4
Fall	3	9	2	19	1	2	1	2	1	3	3	4	1	3	2	3	2	24	4	3	1	1	3	2	4	1	3	3	1	3	2	3	3	1	3	3	3	3	3	1	4	4	4	3	1	3
Fall	3	9	2	18	2	1	1	2	1	4	4	3	3	2	3	2	2	26	3	3	1	1	2	1	3	1	1	2	1	3	2	3	2	1	3	3	4	2	2	2	2	1	2	1	2	2
Fall	3	9	2	27	2	1	1	3	3	4	3	2	2	2	3	3	4	29	4	3	2	1	4	1	3	2	3	4	1	4	2	4	4	1	4	2	4	2	3	4	3	3	3	2	4	2
Fall	3	9	2	19	2	1	1	1	1	0	0	4	0	3	4	1	1	15	3	2	1	1	2	1	4	1	2	3	1	2	2	2	2	1	4	3	2	3	1	4	2	2	2	1	4	3
Fall	3	9	2	22	1	2	1	0	0	0	4	4	0	4	4	1	0	17	3	3	1	1	1	1	4	1	1	2	1	3	1	3	1	1	4	4	1	3	2	1	2	4	3	1	1	2
Fall	3	9	2	19	2	2	1	1	0	2	3	2	1	3	3	1	1	17	1	2	1	1	2	1	3	1	1	3	1	2	1	3	3	1	2	1	2	2	2	1	3	2	2	1	1	1
Fall	3	9	2	19	2	2	1	1	1	2	4	3	0	4	3	2	1	21	1	3	1	1	3	1	3	1	2	3	1	4	2	3	4	1	4	1	2	3	3	1	1	1	3	1	1	1
Fall	3	4	2	21	1	3	1	2	0	1	4	2	4	3	2	0	3	21	2	1	1	1	1	1	4	1	1	1	1	1	4	4	2	1	3	1	2	4	2	4	3	3	4	4	4	2
Fall	3	4	2	22	1	3	1	4	3	2	3	3	2	3	2	2	1	25	4	3	2	1	4	2	3	2	2	4	1	4	2	3	4	1	4	2	3	4	2	4	4	4	3	2	4	2
Fall	3	4	2	19	2	1	1	2	2	3	3	2	1	3	4	2	1	23	4	4	1	2	4	2	4	2	1	4	2	4	2	4	4	2	4	2	3	3	3	4	4	2	3	2	4	2
Fall	3	4	2	20	1	3	1	2	2	2	3	4	2	4	4	1	2	26	2	3	1	2	3	4	4	1	2	4	3	4	1	3	3	2	3	4	4	4	1		2	1	1	1	4	4
Fall	3	4	2	19	1	1	1	2	1	3	2	3	1	2	2	4	3	23	3	3	4	3	1	2	4	3	2	1	3	3	3	2	1	2	2	4	3	3	2	1	1	3	2	2	1	3
Fall	3	4	2	18	2	1	1	2	1	2	4	4	2	3	3	2	1	24	4	4	1	1	4	1	4	1	3	4	1	4	3	4	3	1	4	2	2	4	4	1	4	4	4	1	2	2
Fall	3	4	2	20	1	2	1	2	2	3	2	2	0	2	2	2	2	19	2	3	1	1	2	3	4	1	2	2	1	3	1	4	3	1	4	2	2	4	1	1	2	3	3	1	1	2
Fall	3	4	2	26	1	1	1	2	2	3	4	3	1	2	3	3	1	24	3	4	1	1	2	1	4	1	2	3	1	1	2	4	3	1	2	3	3	4	2	1	3	4	4	2	1	2
Fall	3	4	2	20	1	2		4	4	4	2	0	4	2	2	4	4	30
Fall	3	4	2	20	1		1	1	0	1	3	3	0	3	3	1	0	15	2	3	1	1	1	1	4	2	1	1	1	2	1	2	1	1	3	2	2	2	1	1	1	2	2	1	2	1
Fall	3	4	2	18	1		1	1	1	2	2	2	2	3	3	1	1	18	3	3	1	2	2	2	2	1	3	2	2	2	3	1	2	1	3	1	3	3	1	1	3	2	2	2	1	1
Fall	3	4	2	19	1	3	1	3	1	2	4	3	0	4	3	2	0	22	2	4	1	1	4	2	4	2	1	4	1	4	3	3	4	1	4	4	4	4	3	4	4	4	3	3	4	4
Fall	3	4	2	28	1	3	1	1	1	1	2	3	2	3	3	1	1	18	1	4	1	1	3	1	4	1	1	2	1	2	3	3	2	1	1	1	2	3	2	4	2	2	4	4	4	1
Fall	3	4	2	20	2	3	1	2	3	3	3	2	2	2	2	1	1	21	1	2	1	1	3	2	2	1	1	3	1	2	1	3	3	1	2	1	1	1	1	2	2	1	3	1	2	1
Fall	3	4	2	18	1	1	1	1	2	3	3	3	1	2	2	3	3	23	3	2	1	3	1	1	2	1	1	1	3	2	3	2	1	1	3	3	4	4	1	1	1	4	2	3	1	3
Fall	3	4	2	18	1	1	1	0	0	1	4	3	0	4	4	0	0	16	1	1	1	1	1	1	1	1	1	1	1	1	1	1	1	1	1	1	1	1	1	1	1	1	1	1	1	1
Fall	3	4	2	23	1		1	4	4	2	2	2	3	2	2	2	2	25	2	2	3	3	2	3	3	4	3	2	3	4	1	3	3	4	1	2	4	2	4	4	3	3	3	1	3	3
Fall	3	4	2	23	2	3	1	1	2	2	4	3	2	2	3	1	1	21	2	3	1	2	3	2	3	1	1	3	2	4	2	3	3	1	4	3	4	3	3	1	3	4	4	1	1	2
Fall	3	4	2	20	2		1	4	2	4	3	2	2	1	2	4	2	26	4	2	1	4	4	3	4	1	4	2	4	4	2	2	2	2	4	4	3	4	1	1	3	3	1	2	1	3
Fall	3	4	2	18	1	1	1	2	0	2	4	4	0	4	4	2	0	22	3	4	1	1	1	1	4	1	2	3	1	4	4	4	1	1	4	3	2	4	1	1	3	4	4	1	1	1
Fall	3	4	2	19	1		1	2	1	2	3	3	1	3	3	1	1	20	2	2	1	1	2	1	3	1	2	1	1	3	2	3	2	1	3	2	2	2	2	3	2	2	2	2	3	2
Fall	3	4	2	20	1	2	1	2	0	2	3	2	0	1	3	3	1	17	3	3	1	4	1	1	3	1	1	1	4	3	1	1	1	1	3	1	3	3	1	1	3	3	2	1	1	3
Fall	3	4	2	18	2	1	1	4	4	4	2	2	4	1	1	3	4	29	3	3	3	3	4	4	3	2	2	4	3	3	4	4	4	3	4	3	4	2	4	2	4	2	2	2	2	2
Fall	3	4	2	21	2	3	1	3	3	4	2	3	2	4	2	4	2	29	3	3	1	2	4	4	4	1	2	4	2	4	4	3	4	1	4	4	4	4	4	4	4	4	4	2	3	3
Fall	3	10	2	20	2	2	1	4	4	4	1		4	0	1	1	4		2	3	4	1	3	3	4	2	2	4	1	2	4	2	4	4	4	1	4	4	4	1	4	4	4	4	2	1
Fall	3	10	2	20	1	2	1	1	2	3	3	2	2	3	0	1	1	18	3	4	2	2	1	1	2	1	1	2	1	1	1	1	2	1	3	1	1	4	1	1	1	1	3	2	1	2
Fall	3	10	2	22	2	4	1	2	1	4	3	2	0	2	3	1	1	19	2	2	2	1	3	1	3	2	1	2	1	4	1	3	2	1	3	2	1	4	2	1	3	3	4	1	1	3
Fall	3	10	2	19	1	2	1	1	0	1	4	3	0	3	4	1	0	17	1	3	1	1	1	1	3	1	1	1	1	2	2	2	1	1	3	1	1	3	3	3	2	2	2	1	1	1
Fall	3	10	2	23	1	3	1	0	0	0	4	4	0	4	4	0	0	16	4	4	1	1	1	1	4	1	1	4	1	4	1	4	4	1	4	4	4	4	1	4	4	4	4	1	4	4
Fall	3	10	2	19	1	2	1	1	2	4	3	2	1	3	1	0	2	19	3	3	1	1	1	1	1	1	1	1	1	1	1	2	2	1	4	3	1	1	1	4	4	4	2	1	4	1
Fall	3	10	2	19	1	2	1	1	1	2	4	2	2	2	2	0	2	18	3	3	1	1	1	1	3	1	3	2	1	1	1	1	1	1	2	2	2	2	2	3	3	2	2	2	4	4
Fall	3	10	2	18	2	1	1	2	1	4	3	3	2	3	3	1	2	24	1	3	1	1	3	2	2	1	1	2	1	2	1	3	3	1	2	1	2	3	1	4	3	3	3	1	4	1
Fall	3	10	2		1	3	1	3	1	4	3	2	2	1	2	1	2	21	3	4	1	2	2	1	4	1	2	2	1	3	2	4	2	1	3	4	3	4	2	2	2	4	4	2	1	4
Fall	3	10	2	19	1	2	1	2	1	2	3	3	1	4	3	1	1	21	4	3	1	1	2	1	3	1	1	3	1	3	2	4	2	1	3	2	2	4	4	3	2	3	4	3	1	2
Fall	3	10	2	18	1	1	1	2	1	1	2	2	2	3	3	2	2	20	3	2	2	3	1	2	2	2	3	2	3	1	2	3	1	2	2	3		3	2	1	3	1	3	2	3	1
Fall	3	10	2	18	1	1	1	1	2	1	3	2	2	2	2	1	1	17	3	2	1	1	2	1	3	1	1	1	1	3	3	3	1	1	2	4	4	2	1	1	2	2	4	1	1	4
Fall	3	10	2	20	2	3	1	3	2	4	2	2	4	1	2	3	3	26	3	3	1	2	2	1	3	1	1	2	2	4	1	3	2	1	4	4	4	2	2	1	2	2	2	2	1	3
Fall	3	10	2	18	1	1	1	2	1	3	2	2	2	3	2	2	3	22	4	4	1	2	2	1	3	2	3	4	1	3	3	4	2	1	4	3	3	3	2	2	2	3	4	4	2	3
Fall	3	10	2	18	2	1	1	2	1	4	3	3	1	2	2	3	1	22	3	4	1	1	4	1	4	1	2	3	1	2	2	4	4	1	3	3	2	3	2	3	3	3	3	1	4	2
Fall	3	10	2	19	2	2	2	4	3	4	0	2	2	2		2	4		2	2	1	1	2	3	2	1	1	3	1	4	4	3	3	2	4	1	2	1	4	2	4	3	3	4	2	1
Fall	3	10	2		2	1	2	2	4	2	1	1	3	2	3	2	4	24	3	2	1	1	2	2	3	3	3	3	2	2	1	1	1	1	1	1	1	2	3	3	2	2	1	3	4	4
Fall	3	10	2	19	1	1	1	1	1	0	0	3	0	4	4	0	0	13	2	4	4	1	3	1	1	1	1	1	4	3	1	4	1	2	4	4	1	2	3	4	1	2	1	1	2	4
Fall	3	10	2	19	1	2	1	2	1	3	3	2	2	2	3	2	2	22	3	3	2	1	3	3	3	2	3	3	1	2	2	3	3	3	3	2	3	3	3	3	3	3	3	3	3	3
Fall	3	10	2	22	2	3	1	1	2	4	3	4	3	2	3	1	3	26	2	4	1	1	4	1	3	1	1	4	1	3	3	4	3	2	4	4	3	4	4	1	3	4	4	1	1	2
Fall	3	10	2	19	2	1	1	3	3	4	2	2	2	2	2	3	3	26	3	2	1	1	3	3	2	1	2	3	1	3	3	3	3	2	2	2	2	3	3	2	3	3	2	3	2	2
Fall	3	10	2	20	2	1	1	2	0	2	4	3	0	3	4	1	0	19	3	4	1	1	4	1	4	1	2	4	1	4	3	4	4	1	4	2	2	4	2	4	4	4	4	2	4	1
Fall	3	10	2	22	2	2	1	3	3	4	3	2	2	2	2	3	2	26	4	3	2	1	4	2	3	1	3	4	1	3	2	3	4	1	3	1	4	2	2	4	4	3	3	1	4	2
Fall	3	10	2	19	1	2	1	2	1	1	3	3	2	3	3	2	2	22	4	3	2	2	3	1	3	1	1	3	2	2	1	2	3	1	3	3	4	4	3	3	3	3	3	1	3	3
Fall	3	10	2	18	2	1	1	3	1	3	3	2	3	3	2	2	1	23	4	4	2	1	3	1	3	1	2	2	1	3	3	4	3	1	3	1	4	3	2	1	2	2	2	2	1	1
Fall	3	10	2	18	2	1	1	2	1	3	3	2	2	2	2	2	2	21	3	2	3	4	2	2	2	3	3	4	3	2	4	3	3	2	1	3	2	3	2	1	4	3	2	3	1	2
Fall	3	10	2	18	2	1	1	2	1	3	3	2	2	2	2	2	2	21	3	2	3	4	2	2	2	3	3	4	3	2	4	3	3	2	1	3	2	3	2	1	4	3	2	3	1	2
Fall	3	10	2	19	2	1	1	2	1	3	3	2	1	3	1	2	1	19	3	3	1	1	1	1	3	1	2	3	1	3	1	2	2	1	4	3	3	3	1	2	3	2	1	1	1	1
Fall	3	10	2	18	2	1	1	0	0	3	1		1	3		0	2		1	3	1	1	1	1	1	1	1	1	1	2	3	3	1	1	1	1	1	3	2	1	1	3	3	2	1	1
Fall	3	10	2	20	2	3	1	1	2	4	4	1	2	3	2	1	4	24	4	4	1	1	2	1	4	1	2	3	1	4	4	3	3	1	4	4	4	3	4	4	4	4	4	1	4	4
Fall	3	11	2	18	2	1	1	3	2	3	3	2	3	2	3	3	3	27	3	4	1	1	3	1	4	1	2	3	1	2	2	2	3	1	3	2	3	4	2	3	2	4	3	2	3	2
Fall	3	11	2	18	2	2	.	3	3	3	4	2	2	3	2	2	2	26	2	2	1	1	1	2	3	1	2	1	1	3	1	2	1	1	3	3	2	3	2	4	2	3	2	1	4	3
Fall	3	11	2	18	2		1	2	2	3	1	2	2	2	3	2	1	20	2	2	1	1	2	2	2	1	2	2	1	3	2	3	3	2	3	1	2	2	3	2	2	2	2	2	2	1
Fall	3	11	2	23	1	4	2	2	3	3	4	1	3	4	2	2	3	27	2	4	1	1	1	1	4	1	1	1	1	4	3	4	1	1	4	4	4	4	2	1	1	4	4	2	2	3
Fall	3	11	2	19	2		1	3	2	3	3	2	2	3	3	2	2	25	4	3	3	1	2	1	4	2	2	3	1	4	2	3	3	1	3	2	3	3	2	2	3	4	4	2	2	2
Fall	3	11	2	19	2	2	1	1	1	3	4	3	1	3	3	1	1	21	3	2	1	1	3	1	4	1	2	2	1	4	1	3	3	1	3	1	3	3	1	2	2	2	3	1	2	1
Fall	3	11	2	20	1	2	1	1	2	4	3	2	3	3	2	3	3	26	4	4	3	4	4	1	4	2	4	2	4	4	2	4	4	1	4	3	4	3	3	1	1	2	4	2	4	1
Fall	3	11	2	18	2		1	2	2	4	2	1	2	3	2	3	3	24	3	2	1	2	2	3	2	1	2	3	2	1	2	2	3	2	2	3	2	1	1	2	3	2	2	2	2	3
Fall	3	11	2	21	1	3	1	0	0	2	3	2	0	0	4	2			3	3	1	1	1	2	3	1	1	4	1	3	2	3	2	1	3	2	4	4	1	1	4	2	3	2	2	2
Fall	3	11	2	28	2		1	4	3	3	2	3	2	2	2	3	2	26	1	2	1	1	4	3	2	2	2	2	2	3	2	2	2	2	2	2	3	3	2	3	2	3	2	2	2	3
Fall	3	11	2	20	2	3	1	0	0	1	4	3	0	3	3	2	1	17	2	2	1	1	1	1	2	1	1	1	1	2	1	2	2	1	4	1	3	4	1	1	1	3	4	1	3	1
Fall	3	11	2	20	2	2	1	3	2	4	2	2	1	3	3	3	2	25	4	3	1	1	2	1	3	1	1	2	1	3	2	3	3	1	3	2	3	1	1	2	2	2	3	2	1	1
Fall	3	11	2	18	2	2	1	2	2	3	3	2	1	3	3	2	2	23	4	3	1	1	3	1	3	1	3	3	1	1	2	3	3	1	1	1	3	3	1	4	3	2	3	1	4	1
Fall	3	11	2		2	2	2	4	3	4	2	1	2	1	2	2	2	23	2	2	1	2	2	2	3	2	3	3	1	2	4	4	2	2	3	2	3	2	4	3	4	2	4	4	4	2
Fall	3	11	2	18	2	1	2	2	1	3	3	3	2	3	3	3	2	25	3	2	1	1	4	2	4	1	3	2	1	4	2	4	3	1	3	2	4	3	4	4	3	3	4	1	4	3
Fall	3	11	2	19	1		1	2	2	3	3	3	1	2	3	1	3	23	2	3	1	1	2	1	3	1	1	3	1	3	3	3	3	1	3	1	3	3	3	3	3	3	3	1	3	1
Fall	3	11	2	20	2	3	1	2	2	3	2	2	3	3		1	2		2	3	1	1	2	1	3	1	2	2	1	3	2	3	2	1	4	2	2	3	2	4	2	2	3	2	4	2
Fall	3	11	2	18	1	1	1	0	0	1	4	3	4	4	3	0	0	19	2	3	1	1	1	1	2	1	1	1	1	2	2	1	1	1	3	3	1	4	1	3	2	4	1	1	3	1
Fall	3	11	2	20	2		1	4	4	4	2	0	4	2	1	4	4	29	4	4	1	1	2	3	4	1	1	2	1	4	2	2	1	1	4	1	3	3	3	4	1	1	4	4	4	1
Fall	3	11	2	19	1	1	1	2	2	3	4	2	2	2	3	3	1	24	3	4	1	4	2	1	3	1	1	2	4	2	3	2	3	1	3	3	3	3	2	1	3	3	2	2	1	3
Fall	3	11	2	22	1	4	1	1	1	1	3	3	1	3	3	1	1	18	2	2	1	1	2	1	2	1	1	2	1	2	1	2	2	1	2	2	2	1	2	2	2	1	2	1	2	2
Spri	3	9	2	20	1	2	1	1	2	4	2	2	2	1	2	2	3	21	2	2	1	1	1	1	2	1	1	2	1	2	2	2	2	1	1	1	2	1	1	1	2	2	2	1	1	1
Spri	3	9	2	22	1	3	1	2	2	2	3	3	1	3	3	2	1	22	3	2	1	2	2	1	3	2	1	2	3	2	1	2	3	1	2	1	2	1	1	1	2	2	2	2	2	1
Spri	3	9	2	19	2	1	1	1	2	3	2	2	2	3	3	2	2	22	1	2	2	1	3	1	3	2	2	4	1	3	2	3	4	2	4	3	3	3	1	4	4	4	3	2	3	2
Spri	3	9	2	19	2	1	1	2	1	3	4	3	2	3	3	1	1	23	3	3	2	1	2	1	2	1	1	1	1	1	1	2	2	1	3	2	3	1	2	3	1	3	2	1	2	1
Spri	3	9	2	22	1		1	2	1	3	1	3	3	2	3	3	2	23	3	3	1	2	2	3	4	1	2	3	2	4	1	4	2	1	3	3	2	3	3	1	2	3	4	1	1	3
Spri	3	9	2	19	1	1	1	2	1	3	2	2	1	3	2	2	1	19	3	3	2	1	1	1	3	1	1	1	1	1	2	2	1	1	1	1	1	3	2	2	2	1	2	3	3	1
Spri	3	9	2	19	1	2	1	2	1	3	2	1	2	2	2	3	2	20	4	3	1	2	1	2	2	1	2	3	2	2	2	2	2	2	2	2	1	3	2	3	2	2	2	2	2	2
Spri	3	9	2	22	2	4	1	2	1	3	4	3	2	4	3	1	2	25	3	3	3	1	3	2	4	2	3	4	1	3	2	3	4	3	3	3	4	4	2	4	3	4	3	2	4	2
Spri	3	9	2	19	2	1	1	1	1	2	4	3	0	4	3	0	1	19	2	1	1	1	1	1	3	1	1	2	1	2	1	2	1	1	3	3	3	3	1	3	1	2	2	1	3	3
Spri	3	9	2	30	1	3	1	2	1	3	3	1	3	3	2	1	3	22	4	4	1	2	3	1	4	2	3	4	2	4	4	4	3	1	2	3	4	3	4	1	2	3	3	3	4	2
Spri	3	9	2	20	1	2	1	1	2	3	3	3	1	2	3	2	2	22	2	2	2	2	2	1	3	1	2	2	1	3	2	2	2	2	3	2	2	3	3	1	3	4	2	1	2	2
Spri	3	9	2	22	2	4	1	1	1	2	4	4	2	3	3	1	1	22	2	2	2	2	2	2	2	1	2	3	1	2	2	3	3	1	3	3	2	3	2	4	3	4	3	1	3	2
Spri	3	9	2	19	2	1	1	1	1	1	4	4	1	4	4	1	1	22	1	4	1	1	1	1	4	1	1	1	1	4	1	4	1	1	4	1	1	4	1	1	4	1	4	1	1	1
Spri	3	9	2	19	2	1	1	3	1	2	3	2	2	2	3	1	3	22	4	3	1	1	2	1	3	1	1	2	1	4	1	2	1	1	3	1	4	4	2	3	2	4	3	1	1	1
Spri	3	9	2	19	2	1	1	4	3	4	3	2	2	2	1	4	3	28	3	3	4	3	2	2	2	2	1	2	1	3	3	3	2	2	3	3	4	1	1	1	2	4	2	2	1	3
Spri	3	9	2	22	1	2	1	1	1	1	4	4	0	3	4	2	0	20	1	4	1	1	1	1	4	1	1	1	1	1	1	2	1	1	1	1	1	1	1	1	2	1	1	1	1	1
Spri	3	9	2	20	2	4	1	2	1	2	3	3	0	4	3	2	1	21	1	4	1	1	2	1	3	1	1	2	1	2	4	4	2	1	1	2	1	2	1	1	2	3	3	4	1	3
Spri	3	9	2	19	2	1	1	1	0	3	2	3	0	2	3	0	0	14	1	1	1	1	1	1	1	1	1	1	1	1	1	1	1	1	1	1	1	1	1	1	1	1	1	1	3	1
Spri	3	9	2	20	2	2	1	3	2	3	4	3	1	4	4	2	2	28	2	2	1	1	2	1	4	1	1	4	1	4	1	3	3	1	3	1	2	4	2	3	3	4	3	2	3	1
Spri	3	8	2	19	1	2	1	3	3	3	3	3	3	3	3	3	3	30	3	3	3	3	3	3	3	3	3	3	3	3	3	3	3	3	3	3	3	3	3	3	3	3	3	3	3	3
Spri	3	8	2	19	1	2	1	3	4	2	2	2	3	3	1	4	3	27	1	3	3	4	3	1	2	2	3	2	3	4	3	3	3	1	2	2	3	4	3	1	2	3	2	1	1	1
Spri	3	8	2	21	1	3	1	2	0	3	3	2	1	3	3	1	2	20	2	3	1	1	3	1	2	2	1	4	1	3	1	3	2	1	3	2	3	3	3	2	3	3	3	1	3	2
Spri	3	8	2	19	2	2	1	3	1	2	3	2	1	2	2	2	1	19	3	2	1	1	3	1	2	1	4	3	1	3	3	2	3	1	3	1	2	3	4	2	3	3	2	2	2	1
Spri	3	8	2	20	1	1	1	1	2	2	2	2	1	2	2	1	1	16	2	2	1	1	1	2	2	1	1	2	1	3	2	2	1	1	1	1	1	1	1	2	2	2	3	2	2	1
Spri	3	8	2	20	2	2	1	0	0	3	2	2	2	4	2	0	1	16	3	2	1	3	2	1	4	1	1	2	3	2	2	4	2	1	2	2	4	4	1	1	2	4	3	1	1	1
Spri	3	8	2	19	1	2	1	3	1	1	3	3	0	3	3	2	2	21	4	4	1	1	2	1	4	1	1	1	1	3	1	4	2	1	2	3	4	1	2	3	1	4	1	2	1	4
Spri	3	8	2	19	2		1	1	1	2	4	3	0	3	4	1	0	19	3	4	1	1	3	1	4	1	1	2	1	4	1	4	4	1	4	3	4	4	1	3	3	3	3	1	3	4
Spri	3	8	2	18	2	1	1	2	1	4	2	2	3	3	2	2	4	25	4	3	2	1	2	2	3	1	1	2	1	2	3	3	4	1	3	1	3	3	2	2	2	1	3	1	1	1
Spri	3	8	2	22	1	3	1	2	2	2	3	3	3	2	2	1	2	22	2	4	3	2	2	3	2	2	2	2	2	2	2	2	3	2	2	4	3	2	2	2	2	3	2	2	2	3
Spri	3	8	2	20	2	2	1	3	2	3	3	2	1	2	2	3	2	23	4	3	1	1	2	2	4	1	2	3	1	4	3	3	3	1	3	3	4	4	2	1	3	3	4	3	1	3
Spri	3	8	2	20	1	2	1	2	1	2	3	3	2	3	3	2	2	23	2	3	1	2	1	2	3	2	2	3	2	2	2	3	2	2	3	1	4	3	2	1	1	2	2	2	1	2
Spri	3	8	2	22	2	4	1	2	1	3	3	2	2	3	2	1	2	21	4	4	1	1	3	1	4	1	1	3	1	4	1	4	3	1	4	1	2	1	2	1	3	4	4	1	1	1
Spri	3	8	2	23	2	3	1	3	3	3	3	2	2	3	3	3	2	27
Spri	3	8	2	20	2	2	1	3	3	3	2	2	2	2	2	4	4	27	3	3	2	1	2	2	2	2	3	2	1	3	3	3	3	2	3	3	2	3	2	3	2	1	4	3	4	3
Spri	3	8	2	20	1	2	1	1	1	2	3	2	0	3	3	1	0	16	1	4	1	1	3	1	3	1	1	2	1	2	1	3	2	1	1	2	2	1	1	1	2	2	1	1	1	2
Spri	3	8	2	19	2	1	1	2	1	2	3	3	1	3	4	2	0	21	2	3	2	1	2	2	3	1	2	3	1	2	2	1	2	2	3	3	3	3	2	3	3	3	3	2	2	2
Spri	3	8	2	20	2	3	1	2	2	1	3	3	2	2	2	2	2	21	1	3	1	1	2	4	3	1	2	2	1	2	1	3	2	3	2	1	1	3	2	1	2	3	2	2	2	1
Spri	3	8	2	19	2	2	1	2	4	4	1	1	2	1	0	4	2	21	2	2	2	2	3	1	4	1	3	2	2	3	1	2	4	4	3	2	1	1	3	4	2	3	4	3	3	2
Spri	3	8	2	19	2	1	1	2	2	4	2	2	3	2	1	2	3	23	2	2	2	1	2	3	2	2	3	3	1	2	3	2	2	2	3	4	4	3	2	1	2	3	2	3	1	2
Spri	3	8	2	20	1	2	1	1	1	1	4	3	0	3	3	1	1	18	1	4	1	1	4	1	4	1	1	4	1	1	1	1	4	2	4	3	3	4	2	1	4	4	4	1	1	1
Spri	3	8	2	19	2	1	1	2	2	3	2	2	3	2	2	2	1	21	3	2	1	2	2	1	3	2	1	2	1	2	1	2	1	1	2	2	3	2	1	1	1	2	1	1	1	2
Spri	3	8	2	19	2	1	1	2	2	2	2	3	2	2	2	1	2	20	3	4	1	1	2	1	4	1	3	3	1	3	2	4	3	1	3	3	2	3	3	2	4	4	4	2	1	2
Spri	3	8	2	20	2	2	1	2	2	1	1	2	1	1	2	1	1	14	2	1	1	1	2	2	1	2	1	2	2	1	1	2	1	2	1	2	2	2	1	2	2	1	1	2	1	2
Spri	3	8	2	18	2	1	1	4	2	4	0	1	3	2	1	4	2	23	4	4	3	4	2	2	1	2	1	3	4	4	4	4	3	2	1	4	4	3	1	4	2	4	2	1	3	2
Spri	3	8	2	19	1	1	1	2	1	3	3	3	1	3	3	1	1	21	2	2	1	1	1	1	2	1	1	1	1	2	2	1	1	1	2	2	2	1	2	1	3	2	2	1	1	2
Spri	3	8	2	19	2	1	1	0	0	1	4	4	0	4	4	0	0	17	4	4	1	1	4	1	4	2	3	4	1	4	1	4	4	1	4	1	4	4	4	4	4	4	4	3	4	1
Spri	3	8	2	21	1	3	1	4	4	3	2	2	3	1	2	3	4	28
Spri	3	7	2	19	1	1	1	0	1	0	3	2	0	3	3	1	0	13	2	3	1	1	2	1	3	2	1	1	1	2	2	2	2	1	2	2	2	1	1	2	1	1	1	1	2	1
Spri	3	7	2		1	2	1	2	1	1	4	3	2	4	3	1	1	22	1	4	1	1	3	1	4	1	1	3	1	2	4	4	3	1	3	3	1	4	3	1	2	2	3	1	1	3
Spri	3	7	2				.	2	2	2	3	3	2	2	3	2	2	23	2	4	1	1	2	1	4	1	1	2	1	4	1	4	3	1	4	1	1	4	3	2	2	3	4	2	2	1
Spri	3	7	2	20	1	3	1	2	2	1	3	3	2	2	2	1	1	19	2	3	1	1	1	1	3	1	1	1	1	3	1	3	1	1	3	3	3	3	1	4	1	3	3	1	4	3
Spri	3	7	2	19	2		1	3	3	3	3	1	0	1	1	3	2	20	1	2	1	1	2	1	2	1	1	4	1	2	2	2	4	3	4	3	4	2	1	1	4	3	2	3	1	2
Spri	3	7	2	19	2		1	1	0	2	4	4	1	4		4	0		3	3	1	1	1	1	3	1	1	1	1	2	1	1	1	1	3	1	2	1	1	3	1	1	1	1	3	1
Spri	3	7	2	19	2	1	1	1	1	2	3	3	2	2	3	2	1	20	3	3	1	1	2	1	1	1	1	1	1	1	1	1	1	1	2	1	1	2	2	2	1	2	3	1	1	1
Spri	3	7	2	18	1	1	1	2	1	3	4	2	1	2	3	2	1	21	4	3	1	1	2	1	4	1	2	3	1	2	3	2	4	1	4	2	2	4	2	4	3	2	3	1	4	2
Spri	3	7	2	22	1	3	1	1	1	2	4	2	0	4	3	1	0	18	4	2	1	2	1	1	4	1	2	1	2	3	1	4	1	1	4	4	3	4	1	1	1	4	2	1	3	4
Spri	3	7	2	22	1		1	1	1	1	2	3	1	4	3	0	0	16	2	2	1	1	1	1	2	1	1	2	1	2	2	3	3	2	3	3	4	4	1	1	3	2	2	1	1	2
Spri	3	7	2	19	1	2	1	2	1	3	4	3	0	3	3	0	2	21	1	3	4	2	4	3	1	1	1	3	1	4	2	4	4	1	4	4	2	3	1	2	3	4	4	1	4	3
Spri	3	7	2	21	2	4	1	4	4	4	1	1	3	1	1	3	3	25	4	2	2	1	1	3	2	2	1	1	1	2	3	3	2	2	2	3	3	2	1	1	3	2	3	1	1	2
Spri	3	7	2	19	2	1	1	0	2	3	2	1	1	4	3	0	2	18	2	2	1	1	1	2	3	1	1	2	1	2	1	2	2	1	3	1	2	1	1	1	1	1	1	1	1	1
Spri	3	7	2	19	1	1	1	1	2	2	2	1	1	3	2	2	1	17	3	2		2			3			1	2	4	2		1	2	3	2	2	2		1	3	4	1	2	2	2
Spri	3	7	2	19	2	1	1	2	3	4	2	3	2	1	3	2	2	24	2	3	1	1	4	2	4	1	3	4	1	2	3	2	3	1	3	3	3	3	3	1	4	3	2	3	1	2
Spri	3	7	2	19	2	1	1	4	1	3	3	2	1	3	2	2	2	23	2	3	1	3	4	1	3	1	2	4	3	4	1	1	4	2	4	4	4	4	3	2	4	4	2	1	2	4
Spri	3	7	2	19	2	2	1	2	3	4	3	2	3	3	3	3	4	30	3	3	2	1	3	1	2	2	1	3	1	2	2	4	3	2	2	2	2	2	2	1	3	3	3	4	1	2
Spri	3	7	2	19	1	1	1	2	4	4	2	3	2	2	3	3	3	28	4	3	2	2	2	2	2	2	3	3	2	4	2	4	3	2	4	1	3	2	2	1	3	2	2	2	1	1
Spri	3	7	2	22	2	4	1	3	1	4	3	2	2	3	3	2	3	26
Spri	3	7	2	21	2	3	1	2	4	4	2	2	3	1	3	3	3	27	3	3	1	1	2	1	3	1	1	1	1	2	1	3	2	1	3	1	4	2	2	1	1	3	4	1	3	1
Spri	3	7	2		2	1	1	3	2	3	2	2	2	2	2	3	1	22	2	2	1	1	1	1	4	1	1	4	1	1	2	3	3	1	2	1	4	2	2	4	4	4	2	2	4	1
Spri	3	7	2	20	2	1	1	3	4	3	3	4	3	3	4	2	3	32
Spri	3	7	2	19	2	1	1	3	2	2	3	3	1	3	3	1	1	22	3	3	1	1	3	2	3	1	2	3	1	3	3	3	3	1	3	3	3	3	2	3	3	3	3	2	3	3
Spri	3	7	2	19	2		1	3	3	2	3	2	2	2	3	2	1	23	3	2	1	1	2	1	3	1	2	3	1	2	2	3	2	2	2	3	2	3	2	2	2	3	3	1	2	2
Spri	3	7	2	18	2		2	2	1	4	3	3	2	3	3	1	1	23	3	3	1	1	2	1	3	1	1	2	1	3	2	3	3	1	3	3	3	2	1	1	2	2	3	1	2	1
Spri	3	7	2	20	2	3	1	3	3	3	4	4	4	3	4	3	4	35	2	2	3	2	3	2	3	2	3	3	4	4	2	1	2	2	3	4	3	4	2	1	2	3	2	3	1	2
Spri	3	7	2	18	2	1	1	3	2	3	1	2	2	2	3	2	1	21	4	4	2	1	3	1	4	1	3	3	1	4	1	4	4	1	4	2	4	2	2	2	2	2	4	2	4	2
Spri	3	7	2	18	2	1	1	2	3	3	3	2	1	2	3	3	2	24	2	3	1	1	2	1	3	1	2	3	1	3	1	3	2	1	3	3	2	3	2	2	4	2	3	1	1	3
Spri	3	1	2	19	2	1	1	3	3	4	2	1	2	2	2	2	2	23	3	2	3	2	2	2	2	1	1	2	2	3	2	4	2	3	2	1	4	2	2	2	2	1	3	3	3	1
Spri	3	1	2	19	1	1	1	1	0	2	3	3	0	1	3	2	2	17	3	4	2	1	3	1	4	1	2	3	1	3	1	4	4	1	4	3	3	3	2	2	3	4	4	3	4	3
Spri	3	1	2	21	2	3	1	2	2	3	2	2	2	2	2	3	2	22	3	3	4	3	2	3	2	3	3	2	3	3	3	2	2	1	2	3	2	2	3	4	2	3	2	3	4	2
Spri	3	1	2	19	1	2	1	1	0	2	4	2	1	2	3	1	1	17	3	3	1	2	1	1	2	1	1	1	2	3	1	3	1	2	2	1	2	2	1	2	1	1	1	1	1	2
Spri	3	1	2	20	2	2	1	2	3	4	3	3	2	2	2	1	2	24	1	3	1	1	3	2	2	1	2	3	1	2	2	3	2	1	2	1	2	3	2	2	3	3	2	1	2	1
Spri	3	1	2	20	2	2	1	2	2	2	4	3	2	3		3	3		4	4	3	1	3	3	4	2	3	4	1	4	2	4	4	2	4	4	4	4	3	4	4	4	4	2	4	4
Spri	3	1	2	19	2	1	1	4	4	4	3	3	3	3	3	4	1	32	3	4	1	1	2	1	2	1	1	1	1	4	4	3	1	1	4	4	4	4	2	4	1	3	3	3	3	2
Spri	3	1	2	19	2	1	1	1	1	3	2	2	0	1	3	1	2	16	4	4	2	1	2	1	3	1	2	2	1	3	2	2	2	1	3	4	3	3	2	1	2	2	1	1	1	4
Spri	3	1	2	19	1	1	1	2	4	1	4	3	0	4	3	1	0	22	1	3	1	1	1	1	3	1	1	1	1	1	3	3	3	1	3	3	1	2	1	1	1	2	1	1	1	2
Spri	3	1	2	18	2	1	1	1	3	4	3	2	4	2	2	4	4	29	2	2	3	3	1	3	2	3	3	2	2	2	2	2	2	3	2	2	3	3	2	1	2	3	2	3	1	3
Spri	3	1	2	22	2	4	1	2		3	2	2	1	3	3	2	1		4	3	1	1	3	1	4	1	3	3	1	3	2	4	3	1	4	2	3	3	3	3	3	4	4	1	4	1
Spri	3	1	2	19	2	1	1	1	1	2	4	4	1	4	4	1	0	22	3	3	1	1	2	1	3	1	2	3	1	3	2	3	3	1	4	4	3	3	3	4	2	2	3	2	4	1
Spri	3	1	2	19	1	1	1	3	3	3	3	2	3	4	3	2	3	29																		2	3				1			4
Spri	3	1	2	21	1		1	2	1	4	1	1	2	3	0	2	3	19	1	1	1	1	2	2	2	1	1	1	1	3	4	2	2	1	1	2	4	1	1	1	1	3	3	1	1	1
Spri	3	6	2	24	1	4	1	3	2	2	4	3	1	3	3	2	1	24	2	3	1	2	2	1	4	1	2	3	2	4	3	4	3	1	3	2	3	4	3	2	2	3	3	2	2	1
Spri	3	6	2	20	1	2	1	1	1	1	3	3	1	3	3	1	1	18	2	3	1	1	2	1	3	1	2	2	1	2	3	3		1	3	4	3	3	2	4	1	2	3	3	4	4
Spri	3	6	2	22	1		1	0	0	1	4	4	0	3	2	0	0	14	1	4	1	1	3	1	3	1	1	2	1	3	1	2	2	1	3	1	1		1	4	2		3	1	3	1
Spri	3	6	2	19	2	2	1	2	4	4	4	3	4	4	2	3	2	32	4	2	1	1	4	1	2	1	3	4	1	3	4	3	4	1	2	2	4	1	4	3	4	3	3	4	4	2
Spri	3	6	2	20	2	2	2	4	3	4	3	4	4	1	2	4	4	33	3	2	4	1	4	4	1	4	4	4	1	2	4	4	4	3	2	2	4	4	4	2	4	2	4	3	1	1
Spri	3	6	2	19	2	2	1	1	1	2	4	3	0	3	3	1	0	18	3	3	1	1	2	1	3	1	2	2	1	2	2	3	2	1	3	2	3	3	3	2	1	3	4	1	2	1
Spri	3	6	2	19	2	2	1	3	2	3	3	1	3	2	3	1	2	23	4	3	1	1	2	1	1	1	1	3	1	3	3	2	3	2	3	4	4	2	1	2	3	4	3	3	3	3
Spri	3	6	2	22	2	4	1	2	2	1	3	2	1	3	2	2	2	20	4	4	1	1	4	2	4	1	2	3	1	4	2	3	3	1	4	3	4	4	3	4	3	4	4	1	4	4
Spri	3	2	2	19	2	1	1	3	2	3	4	2	3	3	2	2	2	26	4	3	1	2	2	2	4	1	2	2	1	4	3	4	3	1	3	1	3	3	3	4	2	3	4	3	4	1
Spri	3	2	2	20	1	2	1	1	2	1	4	4	1	3	2	3	2	23	2	4	1	1	3	3	3	1	3	3	1	3	2	3	3	1	3	3	3	3	2	3	3	2	2	1	3	3
Spri	3	2	2	18	2	1	1	3	3	4	2	2	2	2		2	3		3	2	1	1	4	3	2	4	4	4	1	2	2	2	4	2	3	1	3	4	3	2	4	3	2	2	1	1
Spri	3	2	2	19	2	2	1	3	3	3	3	2	0	3	2	2	0	21	2	1	3	2	4	1	1	2	4	4	1	3	3	1	4	1	2	3	4	3	2	4	4	4	2	1	1	1
Spri	3	2	2	19	2	2	1	0	0	0	4	4	1	3	4	1	1	18	2	3	1	1	2	1	2	1	1	2	1	3	1	3	3	1	3	1	2	3	1	2	2	3	2	1	2	1
Spri	3	2	2	18	1	1	.	2	1	3	3	3	1	3	3	2	1	22	2	3	1	1	2	1	3	1	2	2	1	3	1	2	2	1	3	1	2	4	3	3	2	3	3	1	3	1
Spri	3	2	2	18	1		1	2	3	4	2	1	1	3	4	4	2	26	2	2	1	1	3	2	3	2	1	3	1	3	3	3	3	1	3	1	2	3	3	2	3	3	3	2	3	2
Spri	3	2	2	19	1	1	1	4	3	3	2	2	2	3	1	1	3	24	4	2	1	4	1	3	2	3	2	1	4	2	4	3	2	3	3	3	3	1	1	3	3	1	2	2	4	1
Spri	3	2	2	18	2	1	1	3	3	3	2	3	3	2	3	3	3	28	3	3	1	1	2	2	3	2	2	3	1	3	3	3	2	2	3	3	2	3	4	2	3	3	3	2	3	2
Spri	3	2	2	25	1	4	1	3	2	3	3	3	2	2	2	2	2	24	3	3	2	2	2	2	3	3	2	2	3	2	2	3	2	2	3	1	2	3	2	3	2	3	2	3	2	1
Spri	3	12	2	20	1	2	1	2	2	2	2	1	2	2	1	3	2	19	4	3	4	2	4	3	3	2	2	4	1	4	4	3	4	2	2	4	4	4	3	2	3	3	4	2	3	4
Spri	3	12	2	18	2	1	.	2	1	2	3	1	3	2	2	2	3	21	1	4	2	1	2	1	4	1	1	1	1	4	2	4	2	1	4	2	4	3	1	3	1	1	3	1	4	1
Spri	3	12	2	19	2	2	1	2	1	4	3	3	3	2	3	4	3	28	4	2	2	1	1	1	2	2	2	1	1	1	3	2	1	2	1	2	3	2	3	4	1	2	1	1	4	2
Spri	3	12	2	19	1	1	1	2	3	1	4	3	0	2	3	2	0	20	4	4	1	1	3	1	4	1	2	1	1	4	3	4	3	1	1	2	4	4	2	4	1	4	4	4	4	1
Spri	3	12	2	19	1	1	1	1	0	1	1	4	0	4	4	1	0	16	3	3	1	1	1	1	3	1	1	1	1	2	1	3	1	1	3	1	1	3	1	4	1	1	2	3	4	1
Spri	3	12	2	18	2	1	1	2	2	3	4	4	2	3	4	2	2	28	4	3	1	1	4	2	4	1	2	4	1	4	3	3	4	1	4	3	3	4	3	4	4	4	4	3	4	2
Spri	3	12	2	21	1	4	1	3	1	1	3	2	1	4	3	1	0	19	3	3	1	1	2	1	2	1	2	4	1	3	4	3	2	1	2	3	2	3	2	1	3	2	2	1	2	3
Spri	3	12	2	19	1	2	1	3	3	3	2	2	1	2	1	3	3	23	4	3	2	1	3	2	3	2	4	3	1	3	2	2	3	1	4	2	4	3	3	4	3	4	4	3	4	2
Spri	3	12	2	22	1	3	1	2	2	4	2	1	2	2	1	1	2	19	4	2	2	3	2	2	3	2	3	4	2	3	4	2	3	2	3	3	4	4	3	1	3	3	2	4	1	2
Spri	3	12	2	20	2	3	1	3	3	4	2	2	2	2	1	3	3	25	3	2	2	2	3	3	3	1	2	4	2	3	3	4	4	3	2	3	3	3	4	1	3	4	3	1	1	4
Spri	3	12	2	19	2	2	1	1	0	2	3	3	1	3	4	1	1	19	4	4	1	1	1	1	3	1	1	1	1	4	3	4	1	1	4	3	2	4	3	4	1	2	4	1	3	1
Spri	3	12	2	20	2	2	1	2	2	2	3	3	2	2	3	2	2	23	3	3	1	1	3	1	2	1	2	3	1	3	2	3	2	1	3	3	3	2	2	4	3	3	3	2	4	1
Spri	3	12	2	19	1	2	1	1	0	3	4	3	1	3	3	3	0	21	4	4	1	4	3	1	4	1	1	2	2	3	4	4	4	1	4	1	1	1	3	1	3	1	4	2	1	1
Spri	3	12	2	21	2	4	1	1	1	2	4	3	1	4	3	1	1	21	2	4	1	1	3	1	4	1	1	3	1	3	1	3	3	1	3	3	2	3	3	1	3	1	3	1	1	2
Spri	3	12	2	20	2	2	1	0	4	3	4	3	0	4	4	1	1	24	4	4	1	1	3	1	4	1	1	4	1	4	1	4	4	1	4	4	4	4	1	4	4	4	4	1	3	1
Spri	3	12	2	18	1	3	1	2	2	1	3	3	2	3	3	1	1	21
Spri	3	12	2	27	1	2	1	1	2	1	4	3	0	4	3	2	2	22	3	4	1	1	3	1	4	1	1	4	1	4	2	4	4	1	4	2	1	2	3	1	3	3	4	1	1	2
Spri	3	4	2	18	1	1	1	0	1	0	3	2	1	4	3	0	0	14	4	4	1	1	3	1	4	1	1	3	1	4	2	4	3	1	3	1	1	4	3	2	3	4	3	3	2	1
Spri	3	4	2	22	1	4	1	1	2	2	3	3	1	3	3	1	1	20	2	3	1	1	2	1	4	1	1	2	1	3	2	4	2	1	3	3	2	3	2	2	2	2	3	1	2	2
Spri	3	4	2	20	2		1	2	2	2	2	3	3	3	2	2	3	24	4	3	1	1	3	2	3	2	1	2	1	3	2	3	2	1	3	2	3	2	2	2	2	3	3	1	1	2
Spri	3	4	2	18	2	1	1	2	1	3	3	2	1	2	2	1	1	18	3	3	1	1	3	1	4	1	1	3	1	4	2	3	3	1	4	2	2	3	3	2	2	3	2	1	2	1
Spri	3	4	2	19	1	1	1	2	2	2	2	2	2	2	3	2	2	21	4	3	1	2	3	1	3	1	1	2	2	4	2	3	2	1	4	2	4	4	1	2	3	3	4	1	2	1
Spri	3	4	2	21	1	3	1	2	1	1	4	4	1	2	4	2	1	22	2	3	1	1	3	1	4	1	2	4	1	4	1	4	4	1	4	2	1	1	3	3	3	3	4	1	4	4
Spri	3	4	2	21	1	2	1	1	1	3	4	4	1	4	3	1	0	22	1	4	1	1	1	1	3	1	4	3	1	4	3	4	2	1	4	1	3	4	4	1	1	3	2	1	2	1
Spri	3	4	2	19	2	1	1	2	1	3	4	3	0	3	3	1	0	20	1	3	1	1	1	1	2	1	2	2	1	3	1	3	1	1	2	1	1	1
Spri	3	4	2	20	2	2	1	1	2		4	4	0	4	2	2	0
Spri	3	4	2	21	2	4	1	2	0	2	3	2	2	3	2	3	1	20	2	1	1	1	1	2	2	1	1	1	1	2	2	3	2	1	2	3	3	1	2	1	1	3	2	2	1	1
Spri	3	4	2	18	2	1	1	3	2	4	1	1	3	2	2	3	4	25	4	4	1	1	1	2	3	1	1	1	1	3	4	2	1	1	3	2	4	4	1	1	1	3	2	3	1	1
Spri	3	4	2	18	1	1	1	2	1	2	3	2	2	3	3	2	2	22	4	2	1	2	1	2	3	1	2	4	2	3	2	3	1	2	2	2	4	2	2	3	1	2	2	1	2	1
Spri	3	4	2	20	1	4	1	1	0	1	4	4	0	4	3	1	0	18	3	4	1	1	4	1	3	1	1	1	1	1	3	3	4	1	4	4	4	4	2	1	1	4	4	4	1	1
Spri	3	4	2	19	2	1	1	1	0	2	4	1	1	1	3	0	1	14
Spri	3	4	2	19	2	1	1	2	1	3	3	2	1	3	3	2	1	21	4	3	1	1	1	1	2	1	1	2	1	4	1	2	2	1	4	1	4	3	2	2	2	4	3	1	2	1
Spri	3	4	2	23	1	2	1	3	3	2	2	1	1	3	2	1	1	19
Spri	3	4	2	19	2	2	1	4	4	4	3	4	4	3	3	4	1	34	1	4	3	1	3	1	4	1	4	3	1	3	4	3	4	1	4	1	1	3	4	1	4	1	4	3	1	1
Spri	3	4	2	19	2		1	2	2	3	3	2	2	2	1	2	2	21	2	4	1	1	3	2	4	1	2	4	1	3	4	4	3	2	1	4	2	3	4	1	3	2	4	2	2	4
Spri	3	4	2	20	2		1	3	2	3	2	1	1	2	2	3	2	21	3	3	2	1	4	2	3	2	2	4	1	1	1	4	4	1	1	1	3	3	3	1	4	3	4	3	3	1
Fall	3	6	1	18	2	1	1	2	1	1	3	2	1		2	2	1		2	3	1	1	2	1	3	1	4	2	1	2	2	2	1	2	4	4	4	3	3	4	1	2	2	2	4	2
Fall	3	6	1	18	2	1	1	1	0	3	2	4	0	2	3	4	1	20	2	3	4	1	4	4	2	3	4	4	1	3	2	2	4	1	3	1	4	4	4	1	4	4	3	2	3	1
Fall	3	6	1	19	2		1	3	2	4	2	2	2	1	3	2	2	23	4	4	2	2	3	1	3	1	1	2	2	2	4	2	2	1	2	4	1	4	2	1	4	4	3	4	3	3
Fall	3	6	1	18	2	2	1	3	3	4	2	2	1	3	2	2	2	24	3	4	1	1	2	1	4	1	1	2	1	2	3	4	2	1	3	1	2	4	2	1	2	4	4	3	1	1
Fall	3	6	1	19	2	2	1	2	1	2	3	3	1	2	3	1	1	19	2	2	1	1	1	1	2	1	1	1	1	2	1	2	1	1	2	2	3	2	1	2	2	2	2	1	1	1
Fall	3	6	1	18	2	1	1	2	0	3	4	4	1	3	3	2	1	23	3	3	1	1	2	2	3	1	2	2	1	3	4	2	2	1	3	4	4	3	2	3	3	3	3	2	1	3
Fall	3	6	1	19	1	2	1	2	2	3	2	2	2	3	3	3	2	24	3	2	1	2	2	1	3	2	2	3	2	4	2	3	3	1	4	4	3	3	2	1	3	2	2	1	1	2
Fall	3	6	1	29	1		1	2	1	2	3	2	2	2	3	2	1	20	2	4	1	1	3	1	4	1	2	3	1	3	2	3	3	1	2	3	3	2	2	1	3	2	3	2	1	2
Fall	3	6	1	19	1	2	1	3	3	4	3	2	0	3	2	3	2	25	4	3	2	1	4	3	3	1	4	4	1	3	4	4	4	2	3	4	4	4	4	3	4	3	3	4	4	3
Fall	3	6	1	20	1		1	2	2	2	3	2	0	2	2	2	1	18	3	2	1	2	2	1	3	1	2	1	2	2	2	2	2	2	3	3	3	2	3	3	2	3	3	1	3	2
Fall	3	6	1	18	2	1	1	2	3	3	4	4	2	3	4	4	3	32	4	4	1	2	2	3	4	3	1	4	2	4	1	3	4	2	4	4	4	4	2	1	4	4	3	2	1	4
Fall	3	6	1	20	1	3	1	1	0	2	4	3	1	3	2	2	0	18	3	3	2	1	3	1	3	1	1	3	1	3	4	3	2	1	4	2	2	4	1	4	3	2	4	3	1	1
Fall	3	6	1	18	1	1	1	1	1		2	2	1	1	2	2	1		2	2	1	1	1	1	2	1	1	1	1	1	1	2	1	1	1	2	2	1	1	1	1	2	1	1	1	2
Fall	3	6	1	18	1	1	1	0	1	1	3	4	0	4	4	1	0	18	4	2	1	1	1	1	3	1	1	1	1	1	1	1	1	1	1	1	1	2	1	1	1	1	1	1	1	1
Fall	3	6	1	18	2	1	1	2	4	4	3	2	4	2	3	4	2	30	4	4	2	1	2	1	4	2	2	4	1	4	4	4	3	2	4	4	4	4	2	1	4	4	4	3	1	2
Fall	3	6	1	18	2	1	1	2	0	3	2	2	1	1	1	2	0	14	2	3	1	1	2	1	2	1	1	1	1	2	1	1	2	1	2	3	2	3	1	1	2	3	1	2	1	2
Fall	3	6	1	23	1	3	1	2	3	2	4	3	0	4	4	3	1	26	4	4	1	1	2	1	4	1	2	4	1	4	4	4	4	1	4	4	1	4	2	4	4	4	4	1	4	2
Fall	3	6	1	19	2	2	1	1	1	2	3	3	1		3	2	1		3	3	1	1	2	1	4	1	2	3	1	2	2	4	2	1	3	2	2	4	2	4	3	3	4	2	3	1
Fall	3	6	1	21	2	4	1	4	3	4	3	2	2	2	2	4	3	29	4	3	1	1	4	2	2	4	1	4	1	4	1	4	4	1	3	2	4	4	1	4	4	3	4	2	4	2
Fall	3	6	1	19	1	2	1	2	1	2	3	1	0	3	3	2	1	18	2	3	2	2	1	1	3	2	2	1	3	2	3	3	1	1	2	4	3	4	3	1	1	4	2	2	1	4
Fall	3	6	1	19	1	2	1	0	0	2	4	1	1	3	3	2	1	17	2	2	3	2	3	1	2	3	3	2	1	4	2	3	2	1	2	2	3	2	1	1	1	3	3	1	1	2
Fall	3	1	1	18	2	1	1	4	3	3	2	1	3	2	0	4	3	25	2	4	1	1	4	1	4	1	2	4	1	4	2	3	4	1	4	1	1	4	1	4	4	3	2	4	4	1
Fall	3	1	1	19	2	2	1	3	4	4	4	3	2	2	3	4	2	31	4	4	1	1	3	1	4	1	2	2	1	4	4	4	3	1	4	4	4	2	2	4	3	3	4	1	4	2
Fall	3	1	1	19	2	2	1	0	0	0	4	4	0	4	4	0	0	16	2	4	1	1	1	1	4	1	1	1	1	4	1	2	1	1	3	1	1	4	1	4	1	1	1	1	4	1
Fall	3	1	1	19	2	2	1	3	3	4	2	2	2	3	3	3	2	27	3	2	1	2	4	1	3	1	2	3	1	3	4	3	4	1	2	2	3	3	2	3	3	3	3	2	4	2
Fall	3	1	1	19	1	1	1	2	2	3	3	1	3	2	2	3	2	23	3	3	1	1	2	1	4	1	1	2	1	3	3	3	2	1	4	1	1	4	2	4	2	3	3	1	3	1
Fall	3	1	1	22	1	4	1	2	0	2	4	4	0	3	4	2	0	21	3	4	1	1	3	1	4	1	1	4	1	1	2	4	4	1	3	2	1	1	1	1	1	1	1	1	1	1
Fall	3	1	1	23	2	2	1	3	2	3	2	2	1	2	2	3	2	22	3	3	1	2	3	2	3	1	3	4	2	4	3	3	4	1	4	1	3	4	4	4	4	4	4	2	4	1
Fall	3	1	1	18	2	1	1	1	1	3	3	3	2	2	3	1	1	20	2	2	1	2	4	1	3	1	2	4	2	3	2	3	4	1	2	2	3	3	4	2	3	3	3	4	3	2
Fall	3	1	1	18	1	1	2	2	3	4	3	1	2	2	2	3	2	24	3	2	1	2	1	1	4	1	1	2	2	2	3	3	1	1	1	1	4	3	1	1	1	4	2	3	1	1
Fall	3	1	1	20	1	3	1	0	0	0	4	3	0	4	4	0	0	15	2	3	1	1	1	1	3	1	1	2	1	3	1	4	2	1	1	3	1	3	1		1	2	4	1	2	1
Fall	3	1	1	20	2	2	1	2	3	2	3	2	2	2	2	2	1	21	4	3	2	1	3	1	3	1	1	3	1	3	2	2	3	1	3	1	3	2	3	1	3	2	2	2	1	1
Fall	3	1	1	19	2	2	1	2	3	3	3	2	2	2	3	3	2	25	4	3	3	1	1	1	4	3	3	3	1	2	2	3	1	1	2	3	4	3	2	1	2	3	3	2	1	1
Fall	3	1	1	21	2	4	1	2	2	3	2	2	3	3	1	2	3	23	3	2	1	1	2	2	2	1	2	3	1	2	3	2	2	1	2	2	3	2	1	2	1	2	2	3	2	1
Fall	3	1	1	19	2	2	1	2	2	4	3	2	1	3	3	2	2	24	3	3	1	1	3	1	3	1	1	3	1	2	2	3	4	1	4	2	3	3	2	2	4	3	3	2	3	1
Fall	3	1	1	19	1		1	2	1	1	4	3	1	3	3	1	1	20	3	4	1	1	2	1	3	1	1	3	1	2	2	3	2	1	3	2	2	4	2	2	3	3	3	3	2	2
Fall	3	1	1	19	2		1	2	1	3	2	3	3	3	2	1	2	22	3	3	1	1	3	3	3	3	3	3	1	3	2	3	3	2	4	2	3	3	2	4	1	4	4	4	4	2
Fall	3	1	1	18	2	2	1	2	2	2	3	3	1	3	2	2	1	21	4	3	1	1	2	1	3	1	2	3	1	2	3	3	3	1	3	2	2	4	4	4	3	3	3	4	4	2
Fall	3	1	1	18	2	1	1	1	1	2	2	2	2	2	2	2	1	17	4	2	1	2	2	1	2	3	1	2	2	2	2	3	1	2	3	3	3	2	2	1	2	2	4	2	1	2
Fall	3	1	1	21	2	4	1	4	3	3	3	2	1	3	3	3	2	27	4	4	1	1	4	2	3	1	2	4	1	3	2	3	4	1	4	3	4	4	2	3	3	4	4	3	3	2
Fall	3	1	1	18	2	1	1	1	1	2	4	4	1	4	3	0	0	20	1	4	1	1	4	1	4	1	1	4	1	4	1	4	4	1	4	1	1	1	1	4	4	1	1	1	4	1
Fall	3	1	1	18	2	1	1	3	3	3	2	1	2	1	2	3	3	23	4	3	2	1	3	2	3	1	1	2	1	2	2	3	3	2	2	2	4	4	3	3	2	4	3	3	3	1
Fall	3	1	1	18	2	1	1	3	3	4	4	3	2	2	3	4	2	30	3	4	2	2	3	1	4	2	3	3	1	3	2	3	3	1	3	2	4	4	2	1	2	3	3	2	1	1
Fall	3	1	1	18	2	1		2	2	3	2	1	2	3	2	3	2	22	2	2	2	1	1	1	2	1	2	2	1	2	2	3	2	1	2	3	2	2	1	1	2	2	2	1	1	2
Fall	3	1	1	20	1	3	1	2	3	3	4	2	3	3	3	2	2	27	4	3	1	1	1	1	3	1	2	2	1	2	3	4	2	1	2	3	3	4	3	3	2	4	3	2	2	3
Fall	3	1	1	18	1	1	1	3	1	3	3	2	1	3	2	1	4	23	2	2	1	1	2	1	2	1	1	3	1	4	4	3	1	1	3	4	4	4	2	1	2	4	4	2	1	3
Fall	3	1	1	18	1	1	1	3	0	2	3	3	0	3	3	2	0	19	3	2	3	1	2	1	3	1	1	1	1	2	2	1	1	1	3	2	3	2	2	4	1	2	1	1	4	1
Fall	3	1	1	18	2	1	1	2	3	3	2	2	2	3	2	1	1	21	1	3	1	1	3	2	3	1	1	2	1	3	2	2	2	1	3	3	3	4	1	4	3	4	2	2	4	3
Fall	3	1	1	19	2		1	3	2	4	2	2	2	3	2	4	2	26	4	3	1	1	4	2	3	1	1	4	1	4	2	3	4	1	3	4	4	4	2	3	4	4	3	1	3	4
Fall	3	5	1	18	1	1	1	0	0	1	3	3	1	3	4	1	0	16	4	4	1	1	1	1	3	1	1	3	1	3	3	3	2	1	3	1	1	4	1	1	3	3	3	2	1	1
Fall	3	5	1	24	1		1	1	1	2	3	2	0	3	4	1	1	18	3	3	2	1	2	1	4	1	2	2	1	2	2	3	1	1	2	3	2	2	2	2	1	2	3	1	2	2
Fall	3	5	1	21	2		1	2	0	1	4	4	0	4	4	0	0	19	4	3	1	2	4	1	4	1	3	4	2	4	2	4	4	1	4	1	2	4	2	4	4	4	4	1	4	1
Fall	3	5	1	20	2	3	1	2	1	3	3	3	1	3	3	1	2	22	4	3	1	2	2	1	3	1	2	2	2	3	3	3	3	2	3	2	4	4	3	1	2	4	3	1	2	2
Fall	3	5	1	20	1	3	1	2	1	3	2	2	1	1	1	2	4	19	4	3	2	1	3	1	4	2	4	3	1	4	3	3	4	1	4	2	4	3	1	2	2	4	4	4	2	1
Fall	3	5	1	20	1		1	2	2	2	4	3	1	2	3	0	0	19	2	4	2	2	3	1	4	1	2	3	2	3	3	3	1	3	2	3	3	1	1	1	2	4	4	3	1	1
Fall	3	5	1	18	1	1	1	2	0	1	3	4	0	3	3	2	1	19	4	3	1	2	2	1	3	1	1	3	2	3	1	2	3	1	1	1	1	1	1	1	1	1	1	1	4	1
Fall	3	5	1	21	1	3	1	1	0	2	4	3	1	3	3	1	1	19	3	4	1	2	3	1	3	2	1	2	1	2	1	2	2	1	2	2	2	2	2	2	2	3	3	2	2	1
Fall	3	5	1	19	1	2	1	2	2	2	2	2	2	2	2	0	1	17	3	3	2	2	2	1	4	1	2	3	1	3	2	3	2	1	3	4	2	4	2	1	2	3	3	2	2	2
Fall	3	5	1	19	2	2	1	2	2	3	2	1	2	2	1	2	3	20	3	2	1	1	2	2	2	1	3	2	1	3	4	2	2	2	2	2	4	3	3	1	2	4	2	4	2	1
Fall	3	5	1	18	1	2	1	0	0	0	0	0	0	0	0	0	0	0	4	4	4	1	3	1	4	1	1	1	1	1	4	4	1	1	1	1	1	1	1		4	4	4	4	4	1
Fall	3	5	1	18	2		1	2		0	3	2	3	4	4	2	0		2	2	1	4	4	2	2	2	2	2	2	2	2	2	2	2	2	2	2	2	2	2	2	2	2	2	2	2
Fall	3	5	1	20	2	2	1	2	0	1	3	3	0	4	2	0	0	15	2	3	1	2	1	1	3	1	1	1	1	3	1	4	1	1	3	1	3	4	2	1	1	2	4	1	1	1
Fall	3	5	1	23	1		1	1	2	1	3	2	1	2	2	2	2	18	1	3	1	1	2	2	3	3	2	1	1	3	2	3	3	2	3	1	4	3	3	2	3	3	3	3	3	1
Fall	3	5	1	18	2	1	1	1	2	1	4	4	0	4	4	1	0	21	1	4	1	2	1	1	3	1	1	2	1	2	2	2	1	2	3	2	4	3	1	1	1	1	1	1	1	1
Fall	3	5	1	19	2	2	1	4	4	4	2	1	2	2	2	3	2	26	3	4	1	4	2	2	4	1	3	3	4	3	4	4	2	1	3	2	4	3	4	2	2	4	3	2	4	2
Fall	3	5	1	19	2	2	1	1	1	2	3	3	1	4	4	1	1	21	2	4	1	1	3	1	4	1	1	3	1	4	3	3	3	1	4	1	3	4	2	2	3	2	4	2	3	4
Fall	3	5	1	18	1	1	1	4	4	3	3	2	2	2	2	4	3	29	3	4	1	4	4	2	3	1	4	1	4	3	4	4	3	1	3	2	3	4	4	1	1	2	2	3	1	2
Fall	3	5	1	21	2	4	1	3	2	4	3	4	2	3	4		1		2	2	1	1	3	1	2	1	1	3	1	4	4	4	3	1	3	4	1	4	2	4	3	4	4	1	4	4
Fall	3	5	1	18	2	1	1	1	0	1	3	3	2	3	2	2	1	18	3	2	1	2	1	1	2	1	1	1	1	3	2	3	1	1	3	2	4	4	1	1	1	4	4	4	1	2
Fall	3	5	1	19	1	2	1	1	1	1	4	3	1	4	3	1	0	19
Fall	3	5	1	19	2	2	1	2	3	3	3	2	2	2		2	2		2	3	1	2	2	2	3	2	1	2	1	2	3	2	2	2	2	2	2	3	1	2	2	3	2	1	2	1
Fall	3	5	1	18	2	1	1	2	1	3	4	3	1	3	2	2	2	23	2	3	1	1	2	1	3	1	2	2	1	2	2	1	1	1	4	2	3	4	2	1	1	3	2	2	2	1
Fall	3	5	1	22	1	4	1	2	1	1	1	3	0	4		2	0		2	3	1	1	2	1	3	1	1	3	1	2	3	2	2	1	2	4	3	4	1	1	2	4	3	4	1	2
Fall	3	5	1	18	2	1	1	2	1	3	1	2	1	1	3	2	2	18	4	3	1	1	2	1	3	1	2	2	1	3	2	3	2	1	3	2	3	3	3	4	2	3	3	3	3	2
Fall	3	5	1	18	2	1	1	2	0	0	4	2	3	4	3	0	0	18	3	2	1	4	4	2	3	1	1	4	4	1	2	1	4	1	1	4	4	2	1	3	4	1	1	1	3	4
Fall	3	5	1	18	2	1	1	1	0	3	3	4	2	2	3	2	1	21	4	2	1	1	2	1	3	1	2	3	1	3	1	2	3	1	3	3	3	4	2	2	2	1	1	1	1	2
Fall	3	5	1	18	1		1	1	1	1	4	4	0	4	4	1	0	20	4	4	1	2	3	1	4	1	1	2	2	4	2	4	4	1	4	4	2	4	1	2	4	4	4	1	1	2
Fall	3	5	1	18	2	1	1	1	3	4	3	4	1	3	3	2	1	25	4	3	1	1	4	1	3	1	3	4	1	1	2	3	4	1	3	2	3	3	2	1	4	3	3	1	1	2
Fall	3	5	1	18	2	1	1	2	2	2	3	2	2	3	3	2	1	22	3	4	2	3	3	1	4	2	2	4	3	4	2	3	4	2	4	3	4	4	3	1	3	3	3	2	1	2
Fall	3	5	1	20	2		2	3	3	4	1	1	2	1	1	0	1	17	4	1	1	2	1	4	1	1	3	1	2	2	4	3	1	4	4	1	4	1	4	3	1	3	4	4	3	1
Fall	3	5	1	19	1	1	1	2	1	2	3	3	1	2	3	3	1	21	4	2	1	1	3	1	3	1	1	4	1	3	3	3	3	1	4	4	3	4	1	1	4	4	4	3	1	3
Fall	3	5	1	22	1		1	2	1	4	4	3	1	2	3	2	1	23	3	3	1	3	1	1	3	1	4	2	3	3	3	3	1	2	4	1	2	3	2	1	2	3	3	3	1	2
Fall	3	9	1	21	1	2	1	1	1	1	4	4	0	4	4	1	0	20	4	3	1	1	1	1	4	1	1	2	1	2	1	3	1	1	2	3	1	2	1	1	2	2	2	1	1	2
Fall	3	9	1	18	1		1	2	3	0	3	4	1	3	2	3	2	23	4	2	1	1	1	2	4	3	4	1	1	3	4	4	1	3	3	4	4	3	4	3	2	3	3	4	4	4
Fall	3	9	1	20	1	3	1	2	3	3	3	3	2	4	2	3	1	26	4	2	1	2	3	1	4	2	2	2	2	3	3	3	2	1	2	2	2	2	1	2	1	1	2	3	2	2
Fall	3	9	1	19	1	2	1	1	1	2	2	3	2	2	3	1	0	17	2	3	2	1	1	1	4	1	3	3	1	2	4	3	1	1	3	1	1	4	1	3	3	2	3	1	3	1
Fall	3	9	1	21	2	4	1	2	0	3	4	4	3	2	3	1	0	22	3	2	1	1	2	4	3	1	1	2	1	2	4	2	1	1	2	4	4	4	2	4	2	4	4	1	4	2
Fall	3	9	1	18	2	1	1	2	3	2	4	4	2	2	3	1	1	24	3	3	1	1	2	3	4	1	1	2	1	3	1	3	3	2	3	3	2	3	1	4	3	2	3	1	4	3
Fall	3	9	1	18	2	1	1	3	2	3	2	1	2	2	2	2	2	21	2	2	1	1	4	2	2	2	2	3	1	3	2	2	4	2	3	3	3	2	3	3	3	3	2	2	3	3
Fall	3	9	1	18	1	1	1	1	4	3	1	1	3	4	2	0	1	20	4	2	4	1	4	1	3	3	3	4	1	2	1	2	4	1	1	4	2	4	3	2	4	2	1	1	2	3
Fall	3	9	1	18	2	1	1	4	4	4	3	2	3	1	2	4	3	30	4	4	1	1	4	3	3	1	4	4	1	2	3	4	4	2	2	1	3	4	4	4	4	1	4	3	4	1
Fall	3	9	1	21	2	4	1	1	2	3	2	3	2	2	3	2	2	22	2	2	1	2	1	2	3	1	1	2	1	4	1	4	4	4	4	3	4	2	4	1	3	3	4	1	4	2
Fall	3	9	1	18	2	1	1	2	2	4	3	3	4	3		2	2		3	4	1	1	3	1	4	1	2	3	1	2	2	4	3	1	2	3	4	2	3	2	3	2	4	2	4	3
Fall	3	9	1	19	1	2	1	2	2	1	3	3	3	3	2	1	0	20	4	3	1	1	2	1	3	1	1	3	1	3	2	3	3	1	2	3	4	3	2	1	3	4	3	3	1	4
Fall	3	9	1	20	1	2	1	3	2	2	3	3	1	2	2	4	2	24	4	3	1	1	3	2	2	1	1	3	1	2	4	3	2	1	2	1	2	1	2	1	2	2	2	2	1	1
Fall	3	9	1	18	2		1	0	1	1	3	3	1	4	4	0	1	18	4	4	1	1	1	1	4	1	4	1	1	4	2	4	1	1	4	1	4	4	2	4	1	4	4	1	4	1
Fall	3	9	1	19	1		1	2	1	2	4	2	1	3	4	1	0	20	4	4	3	1	4	1	3	2	2	4	1	4	2	3	4	1	4	3	3	2	1	4	4	2	3	1	4	2
Fall	3	9	1	18	1		1	3	1	3	3	1			2	0	1		4	4	3	1	1	1	3	1	1	1	1	4	3	1	1	1	4	4	4	4	2	2	1	3	4	2	2	4
Fall	3	9	1	19	2		1	2	0	2	3	3	0	3	3	2	1	19	2	2	1	1	4	1	3	1	1	4	1	4	1	4	4	1	3	2	2	2	2	1	3	2	3	1	1	1
Fall	3	9	1	18	1	1	1	2	3	1	3	0	0	2	3	1	0	15	2	4	1	1	3	1	4	1	2	3	1	3	2	4	2	1	2	2	1	4	2	4	3	2	2	2	2	1
Fall	3	9	1	18	1	1	1	1	1	2	3	3	2	3	3	2	1	21	1	4	1	1	1	1	4	1	4	4	1	2	4	4	1	1	4	2	1	4	2	3	1	4	4	1	4	1
Fall	3	9	1	19	1	2	1	0	0	2	2	2	1	2	3	2	1	15	3	2	1	1	1	1	2	2	1	2	1	2	1	2	1	1	2	1	3	3	1	2	1	1	2	1	2	1
Fall	3	9	1	19	2	2	1	4	3	3	3	2	2	2	3	4	4	30	4	4	2	1	4	2	4	3	2	4	1	3	3	3	3	1	3	3	2	3	1	4	4	3	4	1	4	2
Fall	3	9	1	18	2		1	2	3	4	2	2	2	3	3	4	3	28	2	3	1	2	4	2	3	1	3	1	2	3	2	3	4	1	3	3	2	4	4	4	1	2	3	4	3	3
Fall	3	9	1	19	2	2	1	1	0	2	4	2	0	3	3	1	1	17	1	3	1	1	1	2	3	1	1	1	1	3	2	2	1	1	3	2	2	3	1	1	1	2	1	2	1	2
Fall	3	9	1	19	2	1	1	1	1	0	0	4	0	3	4	1	1	15	1	2	1	1	1	1	2	1	1	2	1	1	2	1	1	1	4	2	1	2	2	4	2	2	3	2	4	2
Fall	3	9	1	19	1	1	1	2	2	2	4	3	2	2	3	3	2	25	4	4	2	2	4	1	4	1	1	2	2	2	2	2	2	1	4	1	4	1	2	4	2	2	2	2	4	1
Fall	3	9	1	21	2	4	1	0	1	3	2	3	3	4	2	2	4	24	4	4	2	3	4	1	4	1	2	4	3	4	4	4	4	1	2	1	2	4	3	1	4	3	4	4	1	1
Fall	3	9	1	19	1	2	1	2	3	2	4	2	1	3	3	2	1	23	2	3	1	1	2	1	3	1	1	2	1	3	4	3	2	2	3	3	1	4	2	2	2	3	4	3	2	3
Fall	3	9	1	19	2	2	1	2	2	4	3	2	2	1	3	3	2	24	4	3	1	1	3	2	3	2	2	3	1	3	2	3	3	1	4	2	2	4	3	2	3	4	3	2	2	2
Fall	3	9	1	27	2	3	1	2	3	2	4	3	0	3	3	2	0	22	1	4	1	2	2	1	4	1	1	2	2	2	1	4	2	1	4	1	2	1	3	1	2	1	4	1	2	1
Fall	3	9	1	27	2	1	1	3	3	4	4	2	3	3	3	3	4	32	4	4	3	1	4	1	4	1	3	4	1	4	2	4	4	1	4	2	3	3	3	4	4	4	4	1	4	2
Fall	3	9	1	21	2		2	2	3	3	1	1	3	1	1	2	2	19	2	1	1	2	1	1	2	3	2	1	1	2	2	3	1	2	2	1	2	1	3	1	1	2	1	2	1	1
Fall	3	9	1	19	1	1	2	2	0	2	4	4	1	4	3	1	0	21	4	3	1	1	2	1	4	1	1	2	1	4	1	2	2	1	4	1	4	4	4	2	3	4	2	1	1	1
Fall	3	9	1	19	2	2	1	2	3	4	3	2	2	2	3	1	4	26	4	3	1	2	3	1	4	1	2	2	1	4	1	3	3	2	3	3	2	4	1	1	2	4	4	3	1	1
Fall	3	4	1	22	1		1	2	1	2	3	4	1	2	3	2	1	21	2	2	2	1	2	3	2	2	4	3	1	4	2	2	2	2	4	1	4	4	2	4	3	4	3	1	4	1
Fall	3	4	1	20	1	3	1	4	2	3	4	3	2	4	4	4	0	30	2	4	1	1	4	4	4	1	1	4	1	4	1	4	4	4	4	4	4	1	4		4	3	4	1	4	4
Fall	3	4	1		1	2	2	2	3	1	3	2	2	2	1	2	1	19	2	2	1	2	1	1	3	1			1	1	4		3	1	3	1	1		1	1	2	2	3	3	3	1
Fall	3	4	1	18	1	1	1	2	1	3	4	3	2	3	2	1	1	22	1	1	1	1	2	2	3	1	2	1	1	4	2	2	2	1	2	3	3	3	2	2	1	1	2	3	1	3
Fall	3	4	1	18	1	1	1	0	1	1	3	2	0	3	3	1	0	14	2	2	1	1	1	1	3	1	1	2	1	4	1	2	2	1	2	1	1	1	1	1	1	1	2	1	1	1
Fall	3	4	1	21	2	3	1	3	3	3	2	2	4	2	1	4	3	27	3	4	1	3	3	1	4	1	1	3	3	3	4	4	3	1	4	4	4	4	4	2	3	2	4	4	2	1
Fall	3	4	1	23	1		1	1	1	1	3	2	2	3	3	1	1	18	1	2	1	1	1	1	2	2	1	1	1	3	2	2	1	1	3	3	3	3	2	2	1	2	2	2	2	3
Fall	3	4	1	19	1	2	1	3	3	4	3	2	3	3	2	1	3	27	4	3	1	3	3	2	2	4	1	1	3	3	2	2	3	3	2	4	4	3	2	2	1	3	2	2	1	3
Fall	3	4	1	20	1	2	1	2	3	3	2	2	1	2	2	3	3	23	2	3	2	1	1	1	3	1	1	1	1	2	1	4	2	1	3	2	2	2	1	1	3	2	3	1	1	1
Fall	3	4	1	18	1	1	1	0	2	2	3	3	3	3	2	2	1	21	2	4	1	1	1	1	4	1	2	2	1	2	2	4	2	2	1	4	3	2	2	1	2	2	3	1	1	2
Fall	3	4	1	20	1	3	1	2	1	1	4	3	1	4	3	0	1	20	1	3	1	1	2	1	4	1	1	1	1	1	2	2	2	1	4	1	2	3	2	1	2	3	2	1	1	1
Fall	3	4	1	25	1	1	1	2	1	2	3	3	1	3	3	3	1	22	3	4	1	1	2	4	4	1	1	4	1	2	2	4	4	1	3	4	3	4	2	1	2	4	4	2	1	4
Fall	3	4	1	22	2	3	1	3	2	2	2	2	3	3	3	2	1	23	3	4	1	2	2	1	3	3	2	2	1	3	1	3	4	1	4	2	4	4	3	1	2	4	3	1	1	2
Fall	3	4	1	18	1	1	1	2	2	1	3	2	3	2	3	1	0	19	3	2	1	2	2	2	2	1	1	4	2	1	3	3	2	1	4	2	4	3	2	1	4	2	4	3	1	1
Fall	3	4	1	18	2	1	2	2	2	2	3	2	3	3	2	2	2	23	2	3	1	1	1	1	3	2	1	2	1	3	3	3	2	1	3	2	3	3	2	2	2	3	2	2	3	2
Fall	3	4	1	18	2		1	2	1	2	3	4	1		3	2	0		3	2	1	1	3	1	4	1	1	4	1	3	1	4	4	1	4	3	2	3	2	4	4	2	4	1	4	2
Fall	3	4	1	20	2	3	1	1	1	2	2	3	2	2	2	1	2	18	2	3	1	1	3	1	3	1	1	3	1	3	1	3	3	1	3	2	2	2	1	2	2	2	3	1	2	1
Fall	3	4	1	18	1	1	1	2	3	3	4	2	1	3	2	3	1	24	3	2	1	3	2	1	3	1	2	1	1	2	4	2	1	1	3	3	3	3	1	1	1	4	2	4	1	3
Fall	3	4	1	28	1	3	1	1	3	3	4	2	1	3	3	1	1	22	1	4	1	1	4	1	3	1	1	4	1	4	1	3	4	1	2	1	4	3	1	4	4	1	1	3	4	1
Fall	3	4	1	19	1	3	1	2	1	2	4	4	1	4	3	1	1	23	3	3	1	1	4	1	4	2	2	4	1	4	2	4	4	1	4	4	2	4	3	4	4	4	4	3	4	4
Fall	3	4	1	20	1	3	1	1	0	2	3	3	1	3	3	2	2	20	2	3	1	1	2	1	3	1	1	2	1	2	2	3	4	1	4	4	3	2	1	1	2	2	3	1	1	2
Fall	3	4	1	22	1	4	2	1	1	2	3	2	0	3	2	1	1	16	3	3	1	1	2	1	3	1	2	3	1	2	2	4	3	1	2	4	2	3	2	1	3	3	3	2	1	2
Fall	3	4	1	19	1	3	1	2	1	2	3	3	1	3	3	2	1	21	2	2	3	2	2	2	3	1	2	2	1	2	2	3	2	1	3	3	3	2	2	3	2	2	2	3	3	2
Fall	3	4	1	18	2	1	1	0	2	2	2	2	2	2	1	2	2	17	4	3	1	1	2	1	4	1	1	1	1	4	1	1	2	1	4	1	2	4	4	1	1	4	1	1	1	1
Fall	3	4	1	18	1	1	1	4	1	3	3	3	2	1	3	4	3	27
Fall	3	4	1	18	2	1	1	3	4	4	3	2	4	2	3	3	4	32	2	3	2	2	3	4	3	3	3	4	2	3	3	4	4	3	4	2	4	3	3	1	3	3	4	4	2	1
Fall	3	4	1	22	1	4	1	2	1	1	4	3	1	3	3	2	2	22	1	3	1	1	1	1	3	1	1	2	1	3	1	2	3	1	3	3	1	3	1	1	1	3	3	1	1	1
Fall	3	4	1	20	1	2	1	2	2	3	3	2	3	1	3	3	1	23	4	3	1	4	2	1	3	1	1	4	3	2	2	1	3	1	4	1	4	1	2	1	2	3	3	2	1	1
Fall	3	4	1	19	2	2	1	3	1	3	2	2	2	3	2	1	1	20	4	3	1	3	1	1	4	1	3	1	3	3	3	3	1	1	2	2	4	3	2	1	1	3	4	3	1	2
Fall	3	10	1	19	2	2	1	4	3	4	2	2	4	3	1	2	4	29	1	2	1	2	1	1	3	1	3	4	1	4	3	4	3	1	2	3	4	4	4	2	3	3	3	3	2	1
Fall	3	10	1	19	1	2	1	2	1	3	4	3	1	4	3	1	1	23	1	1	1	1	3	2	1	1	1	2	1	2	1	3	1	1	1	1	2	2	4	1	1	1	1	1	1	1
Fall	3	10	1	18	2	1	1	2	2	2	2	2	1	3	3	1	1	19	2	4	1	1	4	1	4	1	2	3	1	3	1	3	2	1	2	2	3	3	1	2	3	2	3	1	2	1
Fall	3	10	1	22	2	2	1	2	3	3	3	2	0	3	2	2	2	22	4	3	1	1	2	2	2	1	2	3	1	4	3	3	2	1	4	4	4	2	2	4	2	3	3	1	3	3
Fall	3	10	1	19	1	2	1	1	1	2	4	3	0	4	3	0	0	18	1	2	1	1	1	1	2	1	1	1	1	2	1	2	2	1	2	1	1	2	1	1	1	1	2	2	1	2
Fall	3	10	1	22	2	3	1	1	0	2	4	4	1	3	4	1	2	22	4	3	1	1	2	1	4	1	1	2	1	4	2	3	2	1	4	3	4	4	2	1	1	4	3	2	1	4
Fall	3	10	1	20	2	3	1	2	2	4	2	1	3	2	1	3	3	23	4	2	1	2	3	3	2	1	1	2	1	3	3	1	2	2	1	2	3	3	3	1	3	2	1	3	1	1
Fall	3	10	1	18	2	1	1	3	2	4	1	3	2	3	2	3	1	24	3	3	4	1	3	2	3	1	2	2	1	2	3	4	4	2	3	1	1	1	2	1	2	3	4	4	1	3
Fall	3	10	1	18	2	1	1	1	1	4	3	2	2	3	3	2	0	21	3	4	1	1	3	1	3	1	1	2	1	4	2	3	4	2	4	2	3	3	2	3	3	3	3	1	3	2
Fall	3	10	1	18	2	1	1	1	1	2	3	3	1	3	3	2	1	20	1	2	1	1	2	1	3	1	1	1	1	1	1	1	2	1	4	3	3	2	1	2	1	2	1	1	2	2
Fall	3	10	1	18	2		1	3	3	4	3	3	1	3	3	4	2	29	3	3	1	1	4	2	3	1	2	3	1	2	2	2	3	1	3	3	2	3	2	2	2	3	2	1	2	1
Fall	3	10	1	19	1	2	1	2	1	2	4	2	1	1	3	1	1	18	3	3	2	1	2	2	2	1	2	2	1	2	2	2	2	2	2	2	2	2	2	1	2	3	2	2	1	1
Fall	3	10	1	19	1	2	1	1	0	1	4	3	0	4	4	1	1	19	3	3	1	1	3	1	3	1	1	3	1	2	1	3	2	1	3	2	2	3	2	1	2	2	3	1	1	2
Fall	3	10	1	19	2		1	2	0	1	4	3	4	4		1	0		2	4	1	1	3	1	4	1	2	4	1	4	2	4	4	1	4	2	1	4	2	4	2	2	3	2	4	1
Fall	3	10	1	19	2	3	1	1	1	4	3	2	1	3	3	2	0	20	4	3	1	1	3	1	3	1	1	3	1	4	2	4	3	1	3	3	4	3	2	4	3	3	3	1	4	4
Fall	3	10	1	19	1	2	1	1	1	2	3	3	1	3	0	1	1	16	3	3	1	2	1	1	2	1	1	2	2	4	1	3	3	1	3	1	2	3	1	1	1	1	2	2	2	1
Fall	3	10	1	20	2	2	1	0	1	2	4	3	0	1	3	2	1	17	4	4	1	1	4	1	4	1	1	4	1	4	2	3	4	1	4	2	3	3	3	2		4	3	3	2	2
Fall	3	10	1	21	2	4	1	0	0	3	4	2	0	3	3	2	0	17	1	3	1	1	1	1	3	1	1	2	1	4	2	4	2	1	4	3	2	4	2	1	2	3	3	1	1	2
Fall	3	10	1	18	1	1	1	1	2	2	3	2	1	4	3	2	1	21	4	3	2	1	1	1	3	2	2	3	1	3	4	4	3	1	3	2	3	3	3	2	3	4	4	4	1	1
Fall	3	10	1	20	1	3	1	0	0	1	4	4	0	4	4	0	0	17	1	3	1	1	3	1	4	1	1	3	1	2	2	3	3	1	2	3	1	3	1	2	2	3	3	1	2	2
Fall	3	10	1	1	1	2	1	4	2	3	1	2	2	3	3	4	1	25	4	2	1	2	3	3	3	1	1	3	1	2	1	3	3	1	2	2	4	3	2	3	3	3	2	2	4	2
Fall	3	10	1	18	1	1	1	1	1	2	2	3	2	2	2	1	1	17	1	2	2	1	1	1	3	1	1	3	1	3	1	2	2	2	3	1	4	1	1	2	2	2	3	1	4	1
Fall	3	10	1	20	1	3	.	2	2	2		2	2	2	2	2	2		3	3	1	1	2	1	4	1	1	3	1	1	1	2	3	1	1	1	4	4	3	2	2	4	1	3	3	1
Fall	3	10	1	19	1	2	1	2	4	3	4	1	0	3	2	0	0	19	2	2	1	1	1	1	2	1	1	1	1	2	1	1	2	1	2	1	1	4	1	2	1	4	4	1	4	1
Fall	3	10	1	20	1	3	1	2	2	2	4	2	1	3	3	1	1	21	4	4	1	2	2	1	4	1	2	3	1	4	2	4	2	1	3	3	3	4	2	2	2	4	4	2	1	2
Fall	3	10	1	24	1	3	1	2	0	4	4	4	0	4	4	4	1	27	4	4	1	1	4	1	4	1	2	2	1	4	2	4	3	1	4	2	1	4	2	4	2	4	4	4	4	4
Fall	3	11	1	18	2	1	1	2	1	3	3	2	2	3	2	1	3	22	2	2	1	1	4	1	4	2	2	4		2	2	3	4	1	4	1	4	4	2	2	4	4	4	2	3	1
Fall	3	11	1	20	1	2	1	2	1	3	3	2	1	1	1	2	2	18	4	4	1	1	1	1	4		1	1	1	4	1	4	1	1	1	2	2	2	2	1	2	1	2	3	1	1
Fall	3	11	1	18	1	1	1	2	0	2	3	3	3	4	4	2	0	23	1	1	1	1	1	2	2	1	1	1	1	2	1	1	1	1	1	1	1	1	2	2	1	1	1	1	1	1
Fall	3	11	1	18	1	1	1	2	2	3	3	2	3	3	2	1	1	22	4	3	1	1	3	2	4	1	2	3	1	3	3	3	3	2	3	3	4	3	2	1	2	2	3	3	1	2
Fall	3	11	1	19	1	3	1	2	0	4	4	4	0	4	3	1	0	22	1	4	1	1	4	1	4	1	2	4	1	4	2	4	4	1	4	3	3	4	1	2	3	4	1	2	3	4
Fall	3	11	1	20	2	2	1	2	2	4	3	3	1	3	2	3	1	24	1	2	1	1	1	1	3	1	2	1	1	2	2	3	2	1	2	1	2	2	2	1	2	2	3	2	1	1
Fall	3	11	1	18	2	1	2	1	3	4	3	3	2	1	3	1	1	22	2	3	2	1	1	1	2	1	1	2	1	4	2	3	2	1	4	1	3	3	2	4	3	3	2	1	4	1
Fall	3	11	1	18	2	1	2	3	4	4	2	4	3	2	4	3	2	31	1	1	1	2	4	1	4	2	3	2	1	1	1	2	3	1	1	4	4	4	4	2	4	3	2	2	4	3
Fall	3	11	1	18	2		1	3	1	3	3	2	1	2	3	3	2	23	4	3	2	2	4	2	3	1	3	4	2	3	1	3	3	2	3	4	4		1	3	4	3	3	2	3	2
Fall	3	11	1	18	2	1	1	1	1	3	3	4	1	2	3	1	1	20	3	2	1	1	1	1	2	1	2	1	1	4	2	1	3	1	4	1	4	1	1	4	3	3	2	1	4	1
Fall	3	11	1	18	2	1	1	2	1	1	2	2	1	2	3	2	0	16	2	3	1	1	1	1	2	1	2	1	1	3	2	2	2	1	2	2	1	2	2	1	1	2	1	2	1	1
Fall	3	11	1				.												4	4	3	1	3	1	4	1		3	1	4	3	4	3	1	3	4	4	4	2	3	3	4	2	2	2	4
Fall	3	11	1	19	2	2	1	2	0	3	3	2	0	2	3	3	0	18	2	2	1	1	1	1	2	1	1	2	1	2	2	2	1	1	2	1	2	2	2	1	2	2	2	1	2	1
Fall	3	11	1	19	2	2	2	3	2	4	2	2	2	2	2	3	3	25	2	3	1	2	4	2	3	1	4	3	4	3	4	4	4	1	3	2	4	2	4	2	4	3	4	3	3	2
Fall	3	11	1				.												2	4	2	2	3	1	3	1	1	3	2	4	4	4	3	1	3	2	2	4	1	2	3	3	4	4	2	1
Fall	3	11	1	20	2	3	1	1	1	2	3	4	0	1	3	1	0	16	4	4	2	1	1	1	4	2	1	1	1	4	1	4	2	1	4	2	4	4	1	1	1	4	2	1	1	1
Fall	3	11	1	19	2	2	1	2	1	2	4	3	1	3	4	2	1	23	2	3	1	1	2	1	4	1	2	2	1	4	1	3	2	1	3	2	2	3	2	3	2	3	2	1	2	1
Fall	3	11	1	22	1	4	1	1	1	1	3	3	0	4	4	1	0	18	2	2	1	1	2	1	2	1	1	2	1	2	1	2	2	1	2	2	2	3	2	1	1	2	2	1	1	2
Fall	3	11	1	20	2	3	1	1	1	2	4	4	0	4	4	1	1	22	2	1	1	1	1	1	3	1	1	1	1	2	1	3	2	1	4	1	2	2	1	1	1	2	3	1	3	1
Fall	3	11	1	28	2	3	1	2	1	1	4	2	2	3	2	2	2	21	1	2	1	1	1	1	1	1	1	1	1	1	1	1	1	1	1	1	1	1	2	1	1	1	1	1	1	1
Fall	3	11	1	18	2	2	1	3	3	4	2	2	3	1	1	3	3	25	3	2	2	4	2	1	4	1	2	2	4	3	4	2	2	1	3	3	2	3	1	2	2	3	4	4	2	1
Fall	3	11	1	19	2	1	1	0	0	1	4	3	0	3	3	2	0	16	3	1	1	1	2	1	3	1	2	1	1	3	1	2	2	1	3	2	2	2	1	1	2	2	1	1	3	1
Fall	3	11	1	18	2	1	1	2	1	2	4	4	2	2	3	2	0	22	4	4	1	1	2	1	4	1	3	2	1	2	1	3	4	1	4	4	4	4	3	4	2	4	4	2	4	4
Fall	3	11	1	18	1		1	3	1	4	1	2	1	3	2	1	4	22	4	4	2	1	3	1	3	1	1	3	1	3	4	3	3	1	3	3	2	3	3	2	3	3	3	1	3	2
Fall	3	11	1		2	3	1	3	3	3	3	2	1	2	2	0	1	20	2	3	1	2	3	1	3	1	1	2	2	2	3	3	3	1	3	2	2	3	2	3	3	2	3	1	3	1
Fall	3	11	1				.												3	3	1	1	1	1	2	1	1	2	1	3	1	3	1	1	3	2	2	2	1	2	1	2	3	2	2	2
Fall	3	11	1	19	2	3	1	2	3	3	2	3	2	3	3	4	3	28	3	4	1	1	3	1	4	1	2	4	1	4	1	4	4	1	3	2	3	2	2	1	1	2	4	2	4	1
Fall	3	11	1	20	2		1	3	2	3	2	2	1	2	2	2	2	21	3	2	2	2	3	1	1	1	1	2	2	2	3	2	3	1	2	2	2	3	3	2	3	3	2	3	2	2
Spri	3	1	1	19	1	2	1	1	1	1	4	3	1	4	3	0	0	18	1	3	1	1	1	1	3	1	1	1	1	3	1	4	1	1	2	2	3	3	1	1	1	3	3	2	2	1
Spri	3	1	1	20	2	3	1	2	3	3	3	2	2	2	2	2	2	23	3	1	3	2	2	2	2	2	4	3	2	4	4	2	3	1	3	4	2	4	4	4	3	4	2	4	3	4
Spri	3	1	1	19	2	2	1	1	1	3	4	3	1	3	4	3	0	23	3	2	1	1	2	2	2	1	2	2	1	3	1	2	2	1	2	1	2	4	2	3	2	3	1	1	3	1
Spri	3	1	1	20	2	2	1	3	4	3	3	2	2	3	2	4	4	30	4	4	2	2	4	3	4	3	4	4	2	2	2	3	4	2	4	3	4	4	4	4	4	4	4	3	4	4
Spri	3	1	1	21	1	4	1	3	3	2	4	2	1	3	3	3	1	25	3	3	1	1	1	1	4	1	1	2	1	2	1	4	2	1	4	4	1	4	1	4	2	4	4	1	4	4
Spri	3	1	1	21	1	4	1	1	0	0	3	1	1	3	2	1	0	12	4	2	1	1	1	1	2	1	3	3	1	3	2	4	1	1	2	3	3	2	1	1	1	1	3	2	1	3
Spri	3	1	1	19	1		1	1	1	1	3	3	2	3	4	0	0	18	3	3	1	2	3	2	2	1	2	3	2	2	3	2	1	1	2	1	3	3	2	2	2	3	2	2	1	2
Spri	3	1	1	19	2	1	1	2	0	2	3	3	0	3	3	0	0	16	4	3	1	1	2	1	4	1	2	4	1	4	2	3	3	1	3	3	4	2	2	4	4	4	4	3	4	1
Spri	3	1	1	19	2	1	1	3	2	4	4	3	0	1	2	4	2	25	4	4	1	1	4	2	4	1	2	4	1	3	3	3	2	1	3	3	4	3	3	4	3	4	3	3	3	3
Spri	3	1	1	20	2	2	1	1	1	0	2	3	1	3	3	1	0	15	3	1	1	1	1	1	2	1	3	1	1	1	2	3	1	1	4	1	4	2	1	1	1	2	1	1	3	1
Spri	3	1	1	19	1	1	1	1	2	2	3	2	0	3	4	2	1	20
Spri	3	1	1	21	1	3	1	0	1	0	3	2	3	1	3	3	1	17	3	3	2	1	1	1	4	1	2	2	1	3	2	3	3	2	4	4	4	4	4	2	3	4	4	3	2	3
Spri	3	1	1	18	1	1	1	2	1	2	3	3	1	3	4	2	1	22	1	3	2	1	1	1	3	1	1	1	1	3	2	2	1	1	2	3	1	1	1	1	1	2	1	1	1	2
Spri	3	1	1	22	2	4	1	2	2	3	4	4	1	4	4	1	0	25	1	3	1	1	1	1	4	1	3	2	1	4	1	4	2	1	4	4	3	4	3	3	3	3	4	1	4	3
Spri	3	1	1	19	2	1	1	1	3	3	2	2	3	2	1	2	2	21	4	3	2	2	3	1	4	2	2	4	1	2	1	3	4	1	2	1	4	3	2	1	3	3	4	1	1	1
Spri	3	1	1	18	2		1	1	0	3	4	3	1	3	3	0	1	19	4	3	1	2	2	1	4	1	1	4	1	4	2	3	4	1	4	3	4	4	2	4	3	4	3	2	4	2
Spri	3	1	1	18	2	1	1	1	2	1	3	2	2	2	3	1	1	18	2	1	1	1	2	1	3	1	1	1	1	3	2	2	1	1	3	2	2	2	1	1	2	1	1	1	1	2
Spri	3	1	1	20	2	2	1	1	0	1	4	3	0	2	3	1	0	15	2	2	1	1	3	1	2	1	1	3	1	3	2	2	3	1	3	1	3	2	2	3	3	2	3	1	2	1
Spri	3	1	1	19	2	1	1	2	1	3	3	2	1	1	3	2	1	19	3	3	1	1	2	1	2	1	1	3	1	4	2	2	4	1	3	2	3	3	2	1	2	1	2	1	1	1
Spri	3	1	1	21	1	3	1	4	4	4	2	2	2	3	3	3	4	31	1	4	1	1	2	2	4	1	1	1	1	1	2	2		1	1	1	4	3	1	1	1	1	2	2	1	1
Spri	3	1	1	19	1	2	1	0	0	1	2	2	0	4	3	3	1	16	1	3	1	3	3	1		1	1	2	1	4			2	1	2	4	2	3	2	1	2	3	4	2	2	4
Spri	3	1	1	19	1	2	1	1	0	2	4	3	1	3	4	2	1	21	2	2	1	1	3	1	3	1	1	2	1	3	2	3	4	1	3	3	2	3	2	2	3	2	3	2	2	2
Spri	3	1	1	18	2	1	1	1	3	1	3	3	0	3	3	1	0	18	2	2	1	3	3	1	2	1	2	4	2	3	1	3	3	1	3	4	3	4	1	1	4	3	3	3	1	2
Spri	3	2	1	20	1	2	1	1	1	1	4	3	0	2	3	2	0	17	3	3	1	1	2	1	3	1	1	3	1	2	2	3	3	1	2	2	3	3	2	4	3	2	3	2	4	2
Spri	3	2	1	18	1	1	1	1	3	3	3	3	2	3	2	3	1	24	4	2	1	3	2	1	1	1	1	3	3	2	3	2	2	2	2	3	4	4	3	3	3	3	2	3	1	2
Spri	3	2	1	18	2	1	2	3	3	4	2	3	3	2	2	3	4	29	3	2	1	1	2	1	3	2	3	3	1	1	2	3	3	1	3	2	4	2	1	1	3	1	3	1	1	1
Spri	3	2	1	19	2	1	1	3	3	4	3	1	2	3	3	3	3	28
Spri	3	2	1	18	1	1	1	2	1	2	3	2	1	2	3	2	1	19	1	2	1	1	1	2		1	2	1	1	3	1	3	2	2	2	1	3	3	1	2	1	2	2	2	2	2
Spri	3	2	1	19	2	2	1	3	2	2	4	3	0	4	3	3	0	24	4	4	1	1	4	1	4	1	3	3	1	3	1	3	3	1	3	2	3	3	2	2	3	3	3	1	2	1
Spri	3	2	1	20	2	2	1	4	2	3	3	3	0	2	3	2	0	22	4	3	1	1	3	2	3	2	2	3	1	3	3	3	2	1	4	3	3	2	2	3	3	4	4	3	4	2
Spri	3	2	1	19	2	2	1	3	3	3	2	2	2	2	2	3	3	25
Spri	3	2	1	18	2	1	1	2	2	1	2	2	2	2	3	3	2	21	3	2	2	2	2	1	3	2	3	2	2	3	2	3	2	1	4	3	2	3	2	2	1	3	2	1	2	1
Spri	3	4	1	22	1	3	2	2	3	2	3	2	2	3	3	2	1	23
Spri	3	4	1	18	2	1	1	2	1	2	3	3	1	4	4	1	0	21
Spri	3	4	1	20	2		1	0	0	1	4	4	1	1	4	1	1	17
Spri	3	4	1	20	2	2	1	2	1	2	3	2	0	4	3	0	0	17
Spri	3	4	1	20	1	3	1	4	4	4	0	3	1	2	3	4	4	29
Spri	3	4	1	19	2		1	4	4	4	2	2	3	1	2	4	3	29
Spri	3	4	1	18	1	1	1	1	0	0	4	3	0	3	3	0	0	14
Spri	3	4	1	20	2	2	1	1	0	2	1	2	1	3	4	1	0	15
Spri	3	4	1	18	1		1	1	1	2	3	2	1	4	3	2	1	20	2	3	1	1	1	1	3	1	2	2	1	2	2	3	2	1	3	2	2	2	1	2	3	2	3	1	2	1
Spri	3	4	1	18	1	1	1	2	2	1	3	1	1	3	3	1	0	17
Spri	3	4	1	19	1	4	1	0	0	0	4	4	0	4	4	0	0	16
Spri	3	4	1		2		2	3	3	4	1	1	3	2	2	4	4	27	2	1	4	1	2	3	1	1	2	3	4	3	4	3	4	3	3	3	2	1	3	4	1	2	3	1	4	4
Spri	3	4	1	18	2	1	1	2	1	3	3	2	2	3	3	2	2	23	3	3	2	1	3	1	4	1	2	3	1	4	2	3	3	1	4	2	3	3	2	1	2	2	3	2	1	2
Spri	3	4	1	21	1	2	1	2	1	4	3	2		2	2	2	1		2	4	1	1	1	1	3	1	2	3	1	3		3	2	2	3	1	2	2	3	1	2	3	3	1	2	2
Spri	3	4	1		1	3	1	2	2	2	3	2	2	2	3	2	1	21	3	2	2	1	2	2	3	2	2	2	1	3	1	2	3	2	4	1	2	3	2	1	2	3	3	1	2	1
Spri	3	4	1	21	2	4	1	3	2	3	4	2	1	2	3	2	1	23	2	2	1	1	2	2	3	1	1	2	1	2	1	3	2	1	3	2	3	3	2	1	2	3	2	1	1	2
Spri	3	4	1	21	1	4	1	0	1	0	4	3	0	4	4	2	0	18	1	4	1	1	3	2	4	1		2	1	4	3	4	2	1	4	2	3	4	3	1	2	4	4	2	2	2
Spri	3	4	1	19	2	2	1	3	2	2	4	2	2	3	3	2	0	23	2	2	1	1	3	4	4	1	1	3	1	4	3	4	2	1	4	2	3	4	4	1	2	1	4	3	1	1
Spri	3	4	1	21	2	4	1	3	3	4	1	1	2	2	2	4	3	25	3	4	1	1	3	1	4	1	2	2	1	4	3	3	3	1	4	2	1	4	2	1	3	4	4	4	1	2
Spri	3	4	1	22	1	4	1	2	1	1	3	3	1	3	3	1	1	19
Spri	3	4	1	19	2	1	1	2	1	3	3	2	2	3	2	3	1	22
Spri	3	4	1	18	2	1	1	2	3	3	4	1	2	2	3	1	1	22	4	3	1	1	1	1	3	2	3	1	1	4	2	2	1	1	2	1	2	3	3	1	1	4	3	4	1	1
Spri	3	4	1		2		1	2	1	2	3	3	1	2	4	2	1	21
Spri	3	4	1		1		1	1	0	1	4	3	0	4	3	1	1	18
Spri	3	4	1	20	2	2	1	2	2	3	3	2	2	2	2	3	3	24
Spri	3	5	1	21	2	4	1	1	2	2	3	2	2	1	4	2	2	21	3	4	1	2	1	1	4	2	1	1	2	3	1	4	1	2	4	4	3	3	2	1	1	3	2	1	1	3
Spri	3	5	1	18	2	1	1	1	0	3	4	3	1	3	3	0	1	19	3	3	1	1	2	1	3	1	1	2	1	3	2	3	2	1	4	2	3	4	2	1	2	3	3	1	1	2
Spri	3	5	1	18	2	2	1	1	1	1	4	3	0	3	3	1	0	17	2	3	1	1	1	1	3	1	1	1	1	3	1	2	2	1	3	1	2	3	1	1	1	3	1	1	1	1
Spri	3	5	1	23	1	2	1	2	0	1	3		1	3	3	2	1		2	3	1	2	1	1	4	2	1	2	1	3	1	3	1	1	4	2		1	2	2	1	4	4	2	3	2
Spri	3	5	1	19	2	2	1	1	2	3	4	3	2	2	4	2	2	25	3	4	1	3	1	2	3	1	1	2	2	4	2	3	2	1	4	2	1	2	1	3	2	3	4	1	4	1
Spri	3	5	1	20	1	3	1	2	2	2	3	3	1	3	4	3	2	25	3	2	1	2	2	1	3	1	1	2	1	3	2	3	3	1	2	4	3	3	2	3	3	2	3	1	1	4
Spri	3	5	1	24	1	4	1	2	3	2	3	3	1	3	4	1	2	24	3	2	1	1	2	1	4	1	4	3	1	4	4	3	3		4	2	3	4	2	2	3	3	3	3	3	2
Spri	3	5	1	19	1	3	1	1	1	1	3	3	2	2	3	3	1	20	4	3	1	4	2	3	3	1	1	3	4	4	2	3	2	1	4	4	4	3	2	1	2	3	3	1	2	4
Spri	3	5	1	18	1	1	1	1	1	1	4	2	0	3	3	2	0	17	4	4	1	1	2	1	3	2	2	2	1	3	2	3	2	1	3	3	2	3	3	3	3	3	3	1	4	3
Spri	3	5	1	19	2	1	1	1	1	1	4	2	1	4	3	2	1	20	1	1	1	1	1	1	1	1	1	1	1	2	1	1	1	1	1	1	1	1	1	1	1	1	1	1	1	1
Spri	3	5	1	20	1	2	1	2	1	3	2	2	2	2	2	3	0	19	1	2	1	2	3	1	2	1	2	3	1	2	1	1	3	1	2	2	2	2	1	3	3	2	1	2	2	2
Spri	3	5	1	19	2		1	3	0	2	3	3	2	3	3	2	2	23
Spri	3	5	1	22	1	3	1	0	0	0	4	3	0	4	4	0	0	15	2	1	1	1	1	1	1	1	1	1	1	1	1	1	1	1	1	1	2	4	1	4	1	4	1	1	4	1
Spri	3	6	1	18	1	1	1	4	3	3	4	3	1	3		3	1		3	4	1	1	3	1	4	1	3	4	1	4	4	4	4	1	4	4	1	4	4	2	4	4	4	2	3	2
Spri	3	6	1	22	1	2	1	0	1	2	2	3	0	4	2	0	1	15	1	4	1	1	2	1	3	1		2	1	1	2	3	1	1	4	2	1		2	4	1	4	3	1	3	2
Spri	3	6	1	19	2		1	3	2	4	3		2	2	2	3	3		4	2	1	1	4	1	3	1	2	4	1	4	1	3	4	1	4	4	4	4	4	3	4	4	2	2	3	4
Spri	3	6	1	24	1	4	1	3	2	2	3	2	2	3	2	3	2	24	3	4	1	3	2	1	3	1	2	1	2	1	4	3	1	1	3	3	3	2	2	2	2	1	4	2	3	2
Spri	3	6	1	21	1	3	1	1	2	3	4	0	0	2	2	2	1	17	2	2	1	1	1	1	2	1	1	1	1	1	2	2	1	1	1	2	1	1	1	1	1	1	2	2	1	2
Spri	3	6	1	20	1		1	1	1	2	1	3	2	3	2	1	3	19	3	3	1	1	1	1	3	1	2	1	1	3	2	3	2	1	2	4	3	4	3	3	1	4	2	2	3	4
Spri	3	6	1	20	2	2	1	4	4	4	0	2	0	0	0	4	1	19	4	4	1	2	4	4	4	1	1	4	1	1	4	3	4	3	3	1	4	3	4	1	4	3	3	3	1	1
Spri	3	6	1	19	1	2	1	3	1	2	4	2	1	1	2	1	0	17	4	3	1	1	2	1	4	2	2	3	1	3	2	2	3	1	4	3	3	4	1	4	4	2	3	2	4	3
Spri	3	6	1	20	1	2	1	2	1	3	3	2	0	3	3	1	0	18	3	3	1	1	1	1	3	1	1	2	1	1	1	3	3	1	3	2	2	2	2	1	1	1	1	1	1	2
Spri	3	6	1	19	2	1	1	2	1	2	4	3	4	3	3	1	1	24	2	3	1	1	2	1	4	1	1	2	1	4	1	2	2	1	4	2	2	3	2	2	2	2	3	1	2	1
Spri	3	6	1	19	2	2	1	3	4	3	3	2	1	3	3	3	3	28	4	2	1	1	4	2	3	1	3	4	1	2	4	3	4	1	2	3	3	3	3	2	4	4	2	3	2	3
Spri	3	6	1	19	2		1	3	2	4	2	3	3	3	3	3	2	28	1	2	1	2	1	1	2	2	4	3	3	2	1	1	1	3	2	1	2	3	3	4	2	3	1	4	2	1
Spri	3	6	1	22	1	3	1	1	2	2	4	2	2	4	3	2	2	24	3	3	1	1	1	1	4	1	1	2	1	2	2	3	1	1	2	2	2	2	1	1	2	4	3	2	1	2
Spri	3	6	1	20	2	3	1	4	2	3	3	2	3	2	1	3	2	25	4	3	1	2	3	3	3	1	1	3	2	3	3	3	4	2	3	3	3	4	2	3	4	4	4	4	4	2
Spri	3	6	1	20	1	2	1	1	1	2	3	2	0	3	3	1	1	17	2	4	1	1	1	1	3	1	3	1	1	3	2	3	1	1	1	1	1	1	2	1	1	3	4	2	2	1
Spri	3	6	1	19	1	2	1	0	0	1	4	3	0	3	3	1	1	16	2	1	1	1	1	1	1	1	1	1	1	1	1	1	1	1	2	1	1	4	1	2	1	2	1	1	2	1
Spri	3	6	1	18	1	1	2	3	2	4	2	1	1	3	2	4	3	25	2	2	3	1	3	3	3	4	2	4	1	2	3	4	3	1	4	3	4	2	4	1	4	3	4	4	1	3
Spri	3	6	1	23	2		1	2	2	3	3	2	3	3	3	2	1	24	3	2	1	1	2	2	3	2	2	2	1	3	3	2	2	1	3	2	4	3	1	3	2	3	3	3	2	1
Spri	3	6	1	18	2	2	1	1	0	3	2	3	1	4	3	0	1	18	3	3	1	2	3	1	4	1	2	3	1	2	2	4	2	1	3	1	4	4	2	1	3	2	4	1	1	1
Spri	3	6	1	22	2	4	1	3	3	3	3	3	2	2	2	3	2	26	3	2	1	1	4	1	4	2	1	3	1	3	2	3	3	1	4	3	4	3	2	3	3	3	2	3	3	3
Spri	3	6	1	19	2	2	1	3	3	3	3	2	0	3	4	3	1	25	4	4	1	1	1	1	4	2	1	1	1	3	3	3	1	1	4	4	4	4	4	3	1	3	3	3	2	3
Spri	3	7	1	18	2	1	1	2	3	4	2	2	2	2	2	2	2	23	4	3	2	2	3	1	2	1	3	3	2	2	1	3	2	2	2	2	3	2	3	2	3	3	3	1	3	2
Spri	3	7	1	23	1	4	1	1	1	2	3	3	1	3	3	1	1	19
Spri	3	7	1	18	1	1	1	2	0	1	4	3	1	2	3	1	1	18
Spri	3	7	1	19	1	1	1	2	1	3	1	2	1	2	2	3	2	19
Spri	3	7	1	19	1	2	1	1	1	2	4	4	1	4	4	1	1	23
Spri	3	7	1	18	2		1	3	3	3	3	3	3	3	3	3	3	30	3	3	3	1	3	2	3	2	2	3	1	3	3	3	3	3	3	3	3	3	3	3	3	3	3	3	3	2
Spri	3	7	1	18	2	1	1	4	2	2	3	2	3	2	2	3	4	27	2	4	1	1	2	1	3	2	1	3	1	3	2	3	2	1	2	2	4		2	3	4	2	4	2	3	2
Spri	3	7	1	19			1	3	3		4	4	3	4	4	4	4
Spri	3	7	1	19	1	1	1	4	2	3	2	2	2	2	3	4	2	26	3	3	1	2	2	1	3	1	4	2	1	3	2	4	2	2	2	3	3	3	3	1	2	4	3	1	1	2
Spri	3	7	1	19	2	2	1	2	3	4	3	1	2	2	2	2	3	24	3	2	3	3	2	3	2	3	3	2	4	4	3	3	2	3	3	3	4	3	2	2	2	4	3	3	2	3
Spri	3	7	1	21	2	4	1	2	3	2	3	2	1	2	3	3	2	23	4	3	1	1	1	2	3	1	2	2	1	3	3	2	1	1	3	3	2	3	1	1	2	3	3	1	1	3
Spri	3	7	1	19	2	2	1	4	4	4	3	2	4	2	2	3	4	32	3	3	2	1	3	2	3	1	1	3	1	2	4	3	3	2	3	1	3	3	2	2	3	3	3	4	1	1
Spri	3	7	1	22	1		1	2	1	1	3	3	2	2	2	2	1	19	3	2	1	1	2	2	3	1	1	1	1	3	2	3	2	1	2	2	2	2	1	1	1	1	2	1	1	1
Spri	3	7	1	20	2	3	1	1	1	2	2	3	1	2	3	2	1	18	3	3	1	1	2	1	3	1	1	2	1	2	1	3	1	1	2	2	3	3	2	1	1	2	1	1	2	1
Spri	3	7	1	18	2	1	1	2	3	4	3	3	3	3	2	2	1	26	2	2	1	1	1	1	4	1	1	3	1	2	2	3	2	1	2	1	4	1	2	3	2	3	4	1	3	1
Spri	3	7	1	19	2	1	1	1	0	2	4	4	1	3	4	1	0	20	2	2	1	1	1	1	1	1	1	1	1	1	1	1	1	1	2	2	2	1	1	2	1	1	1	1	2	1
Spri	3	7	1	19	1	2	1	2	2	2	4	3	1	3	3	2	1	23	3	4	1	1	2	1	4	1	1	4	1	2	2	4	4	1	3	2	1	4	2	3	3	2	3	1	3	2
Spri	3	7	1	19	2	1	1	1	2	3	3	2	2	3	1	3	1	21	3	2	1	2	4	3	2	1	2	3	2	3	2	3	4	1	2	2	4	3	4	2	2	3	2	3	3	2
Spri	3	7	1	18	2	1	1	0	0	0	4	4	0	4	4	1	0	17	2	4	1	1	3	1	4	1	1	1	1	1	1	1		1	4	1	1	4	1		1	1	4	1	1	1
Spri	3	7	1	22	1	3	1	1	0	2	4	2	0	4	4	1	0	18	3	4	1	1	1	1	2	1	1	1	1	4	1	2	1	1	4	2	2	4	1	1	1	4	2	1	3	2
Spri	3	7	1	22	2	4	1	0	1	4	2	1	1	3	2	3	3	20	3	2	1	1	3	1	3	1	1	4	1	3	1	2	3	1	3	1	2	3	1	2	4	3	2	1	2	1
Spri	3	7	1	18	1		1	1	4	2	3	3	2	2	3	3	1	24	1	4	4	1	1	2	4	4	2	3	1	4	1	4	3	1	4	4	4	4	1	2	2	4	2	1	1	2
Spri	3	7	1	21	2	2	1	2	4	4	1	2	3	1	1	3	3	24	2	3	1	1	2	3	3	1	1	1	1	2	3	4	1	1	3	3	4	4	3	1	2	4	4	1	2	1
Spri	3	7	1	19	2	1	1	2	3	3	2	2	2	2	2	2	2	22	3	2	1	1	3	1	2	1	1	3	1	2	2	3	2	1	2	2	3	3	2	2	3	3	2	2	2	1
Spri	3	7	1	19	2	2	2	1	1	3	3	2	0	3	2	2	1	18	2	2	1	1	3	1	4	1	2	3	1	3	2	4	3	1	3	1	3	3	3	2	2	3	4	1	2	1
Spri	3	7	1	18	2	1	1	0	1	1	4	3	1	4	4	0	0	18	2	1	1	1	1	1	2	1	1	1	1	2	1	1	1	1	2	1	2	2	1	1	2	1	2	1	1	1
Spri	3	7	1	21	2	1	1	2	3	2	3	1	2	4	4	2	2	25	3	3	2	1	1	2	2	2	2	2	1	4	1	3	3	1	3	1	2	2	1	2	3	3	2	1	3	1
Spri	3	7	1	19	2	2	1	4	3	4	2	3	3	3	2	4	3	31	1	2	2	4	3	2	2	1	3	3	3	3	4	4	3	2	4	2	3	3	3	2	3	3	3	2	3	2
Spri	3	7	1	19	2	2	1	1	0	2	3	2	0	3	3	1	0	15	4	2	1	1	1	1	2	1	1	2	1	4	1	3	1	1	3	1	3	1	1	3	2	2	2	1	3	1
Spri	3	8	1	18	2		1	3	3	4	4	0	2	2	1	4	4	27	4	4	1	2	3	2	4	1	4	1	2	3	2	4	4	1	3	4	1	1	1	1	1	4	4	3	1	2
Spri	3	8	1	19	1	1	1	2	1	2	2	1	1	3	3	1	1	17	2	2	1	1	1	1	2	1	1	1	1	2	1	1	2	1	3	3	2	2	1	1	1	2	1	1	1	2
Spri	3	8	1	18	2	1	1	1	1	3	2	3	2	4	3	2	1	22	2	4	1	1	2	1	1	1	3	2	1	4	1	3	2	1	4	2	2	4	3	2	2	4	3	1	1	1
Spri	3	8	1	19	2	2	1	3	2	2	3	2	2	3	3	2	2	24	2	3	2	1	2	2	4	2	1	2	1	3	2	3	3	2	4	3	3	4	2	3	4	3	3	2	4	2
Spri	3	8	1	18	2	1	1	2	2	4	3	1	1	1	1	2	1	18	3	2	4	2	2	2	3	4	3	1	2	3	2	2	4	2	2	3	3	2	2	1	2	2	1	3	1	3
Spri	3	8	1	18	2	1	1	3	1	4	2	2	2	2	2	1	1	20	1	2	1	1	3	1	2	1	2	3	1	4	2	3	4	1	3	3	4	3	4	4	4	4	3	1	4	3
Spri	3	8	1	19	2	1	1	4		3	2	1	2	2	1	2	2		4	4	4	1	3	2	4	4	4	4	1	3	1	4	4	1	4	1	4	4	4	3	4	4	4	3	1	1
Spri	3	8	1	18	2		1	1	0	2	4	4	1	3	4	0	1	20	1	3	2	1	2	1	4	1	1	2	1	3	1	3	2	1	4	1	2	3	2	1	2	3	3	2	1	2
Spri	3	8	1	19	2		1	4	3	3	2	2	4	3		4	4		3	3	4	2	4	4	3	3	1	2	1	2	4	4	4	4	4	4	4	1	3	1	1	2	4	4	4	4
Spri	3	8	1	20	2		1	2	1	2	3	2	2	3	3	1	1	20	2	3	1	1	2	2	3	1	1	1	1	2	1	2	1	1	2	1	3	4	2	1	2	3	4	2	1	1
Spri	3	8	1	20	2	2	1	2	2	3	3	2	2	2	3	2	2	23	4	3	1	1	3	1	3	1	2	2	1	4	3	3	3	1	3	4	3	4	3	1	3	3	3	1	2	3
Spri	3	8	1	19	2	1	1	1	1	2	3	2	1	3	2	2	1	18	2	4	1	1	2	1	4	1	2	4	1	4	1	4	3	1	3	3	3	4	1	2	3	4	4	1	3	1
Spri	3	8	1	21	2	3	1	1	1	2	4	2	1	3	3	2	2	21		4	1	1	1	1	4	1	2	1	1	3	2	4	1	1	4	3	3	4	2	1	1	3	4	3	1	1
Spri	3	8	1	20	1	1	1	2	2	2	2	1	1	1	1	1	1	14	2	2	1	3	3	2	1	2	1	2	3	1	3	1	2	2	2	4	3	2	3	2	2	3	1	3	2	3
Spri	3	8	1	20	1	2	1	1	1	2	3	4	2	3	3	1	1	21	2	3	1	2	1	3	3	1		2	1	2	2	3	1	1	2	1	2	2	2	1	1	1	3	1	1	1
Spri	3	8	1	19	1	2	1	1	1	1	3	2	0	3	3	0	1	15	3	4	1	1	3	1	4	1	1	3	1	3	2	3	3	1	2	1	2	3	2	1	2	3	3	1	1	1
Spri	3	8	1	21	1	3	1	3	4		1	1	1	0	2	4	2		2	2	1	3	3	1	2	1	2	4	3	3	4	3	2	2	3	1	4	3	3	2	3	2	4	2	3	1
Spri	3	8	1	18	2	1	1	3	2	4	2	2	2	2	2	3	3	25	4	2	1	1	2	4	4	1	2	3	1	1	2	3	2	3	1	1	3	2	2	1	2	2	1	1	1	1
Spri	3	8	1	19	2	1	1	2	2	3	3	2	2	2	2	1	1	20	2	2	1	1	2	2	3	1	1	2	1	3	1	2	3	2	2	2	2	3	2	1	2	3	2	1	1	2
Spri	3	8	1	20	1	1	1	2	2	1	3	2	2	3	2	2	1	20	2	2	1	1	1	2	2	2	1	2	1	2	2	2	1	1	2	1	3	2	1	1	1	2	3	3	1	1
Spri	3	8	1	23	2	3	1	2	3	2	4	2	2	3	4	2	1	25	4	3	1	1	3	2	3	1	3	4	1	4	1	4	4	1	3	3	4	3	2	2	3	4	4	1	3	2
Spri	3	8	1		1		1	1	1	1	3	3	0	0	2	2	1	14	1	3	1	1	1	2	1	1	1	2	1	2	1	2	1	1	3	2	3	2	2	2	2	2	3	1	2	2
Spri	3	8	1	19	1	2	1	1	1	3	4	3	2	3	3	1	0	21	3	4	1	3	2	1	4	1	2	2	1	2	3	4	3	1	2	2	3	3	2	2	2	3	3	2	2	2
Spri	3	8	1	20	2	2	1	3	1	4	2	2	3	2	2	1	0	20	1	2	1	1	1	2	4	1	2	1	1	3	2	3	1	1	3	1	4	2	4	1	1	2	2	1	1	1
Spri	3	8	1	19	2	2	1	1	1	0	4	3	1	4	3	2	1	20	3	4	1	2	3	1	4	1	1	3	2	4	2	4	3	1	3	2	4	4	2	1	2	4	4	1	1	2
Spri	3	8	1	19	1	1	1	2	3	1	4	4	0	4	3	2	0	23	4	4	2	2	4	1	4	2	1	4	1	4	4	4	4	1	4	4	1	4	4	4	4	4	4	4	4	4
Spri	3	9	1	18	2	1	1	1	0	1	4	4	1	1	4	0	1	17	2	4	1	1	1	1	4	1	1	2	1	4	1	4	2	1	3	1	2	4	2	1	2	3	2	1	3	1
Spri	3	9	1	22	2		1	3	1	2	3	2	1	4	4	1	1	22	4	4	2	1	4	2	4	3	3	4	1	4	2	3	3	1	4	3	4	4	3	4	3	3	3	2	4	2
Spri	3	9	1	22	1	3	1	2	1	2	2	2	1	3	3	2	0	18	2	2	1	3	4	1	2	2	2	3	3	3	1	2	3	1	2	1	4	3	2	1	3	3	2	1	1	2
Spri	3	9	1	18	2	1	1	1	0	1	4	3	0	4	4	1	0	18	1	2	1	1	1	1	3	1	1	1	1	2	1	1	1	1	3	3	1	2	1	2	1	1	1	1	1	1
Spri	3	9	1	19	2	1	1	2	3	4	2	2	3	3	3	4	1	27	3	4	1	1	2	1	2	1	2	2	1	2	1	4	3	1	3	1	1	3	3	1	2	4	4	1	3	1
Spri	3	9	1	20	1	3	1	2	0	0	0	0	0	3	3	2	0	10	1	4	1	2	4	1	4	1	2	4	1	4	2	4	4	1	4	4	3	4	2	3	3	3	3	1	3	2
Spri	3	9	1	18	2	1	1	3	1	3	2	2	2	2	2	3	3	23	3	3	2	1	2	2	3	2	4	4	1	3	4	4	3	2	2	2	3	3	4	3	3	3	3	4	2	2
Spri	3	9	1	18	2	1	1	3	1	2	3	2	2	3	2	1	2	21	2	2	1	1	2	1	3	1	1	4	1	2	2	3	3	1	2	2	2	3	2	1	2	2	3	2	1	1
Spri	3	9	1	18	2	2	1	3	2	3	2	2	3	2	2	2	3	24	3	3	1	1	3	3	3	1	2	3	1	2	3	3	3	2	2	3	2	2	3	1	3	2	2	3	1	2
Spri	3	9	1	20	2	2	2	4	4	4	1	0	3	1	0	4	3	24	3	2	2	1	2	2	2	2	2	2	1	3	4	2	2	2	2	3	4	3	2	1	2	3	2	3	1	2
Spri	3	9	1	18	2		1	1	1	2	2	3	2	3	3	2	2	21	1	2	1	1	4	1	2	1	2	3	1	2	1	2	3	1	2	1	2	1	2	1	2	2	1	1	3	1
Spri	3	9	1	19	2	1	1	1	1	3	3	2	3	2	3	1	0	19	1	2	1	1	1	1	2	1	1	1	1	1	2	1	1	1	2	1	1	1	1	2	1	1	1	1	3	1
Spri	3	9	1	19	2	1	1	1	0	2	3	4	0	0	3	0	0	13	2	3	1	1	1	1	3	1	1	3	1	4	2	2	1	1	4	2	4	4	2	4	3	3	2	1	4	1
Spri	3	9	1	21	2		1	2	2	2	4	4	4	3	3	3	1	28	2	3	1	1	3	1	3	1	1	2	1	4	2	3	2	1	3	3	2	3	2	4	3	3	2	1	4	2
Spri	3	9	1	22	1		1	3	1	2	4	2	1	2	2	3	0	20	4	3	1	2	1	1	3	1	1	1	2	2	2	2	1	1	3	2	1	2	2	2	2	2	2	2	1	1
Spri	3	9	1	21	2	3	1	1	4	4	3	2	3	2	0	0	0	19	1	2	1	4	1	1	1	1	4	4	4	3	4	3	2	2	2	4	2	1	4	1	2	4	4	4	1	4
Spri	3	9	1	30	1	3	1	2	0	1	4	3	0	3	3	1	0	17	4	3	1	1	2	1	4	1	1	3	1	3	3	4	2	1	3	3	2	3	3	1	2	3	3	1	2	2
Spri	3	9	1	19	1		1	1	1	2	4	3	0	3	3	1	0	18	2	2	1	1	1	1	2	1	1	2	1	2	2	1	2	1	3	2	1	1	1	2	1	1	1	1	1	1
Spri	3	9	1	21	2	4	1	2	0	2	4	2	0	4	2	0	0	16	2	2	1	1	2	1	2	1	1	2	1	1	2	2	2	1	2	1	1	1	1	3	1	1	1	2	3	1
Spri	3	9	1	19	1	2	1	2	1	3	2	2	1	2	4	2	1	20	4	2	1	3	3	2	4	1	1	3	3	4	2	2	2	1	3	3	4	4	2	3	3	3	4	2	3	2
Spri	3	9	1	22	2	4	1	2	0	1	4	4	3	3	2	2	0	21	2	4	1	3	2	1	3	1	2	3	3	3	3	4	4	2	2	2	3	2	3	1	3	2	4	2	1	1
Spri	3	9	1	22	1	4	1	1	1	2	4	4	2	4	3	1	1	23	2	3	1	1	3	4	3	2	2	1	1	4	1	4	1	2	2	2	3	1	3	1	2	3	4	1	1	2
Spri	3	9	1		1		1		1	2	2	2	2	2	1	2	1		3	2	1	1	2	1	2	3	1	2	1	1	1	3	1	2	1	3	1	2	1	1	2	1	3	1	2	1
Spri	3	9	1	22	1	3	1	1	0	2	4	4	2	4	4	1	0	22	2	4	1	1	1	1	2	1	1	1	1	1	2	4	1	1	1	1	1	2	2	1	1	4	3	3	1	1
Spri	3	9	1	20	1	2	1	2	2	2	3	3	2	3	3	1	1	22	2	2	2	2	2	1	4	1	3	2	2	4	2	3	2	1	3	2	3	3	3	1	3	4	2	1	1	1
Spri	3	9	1	19	1	1	1	2	0	2	3	3	1	2	3	2	1	19	4	3	1	2	3	1	3	1	1	3	2	1	2	3	3	1	3	2	2	3	3	2	3	3	3	2	4	1
Spri	3	12	1	19	1	2	2	3	2	3	2	2	2	2	2	2	3	23	2	3	2	1	4	3	3	2	2	4	1	3	4	4	4	1	3	4	2	2	3	2	4	4	3	3	3	4
Spri	3	12	1	27	1	2	1	2	2	1	4	4	1	3	3	2	1	23	3	4	1	1	2	1	4	1	2	3	1	3	3	4	4	1	4	2	2	2	2	1	3	2	4	3	2	2
Spri	3	12	1	21	1	3	1	2	3	4	3	2	1	2	2	1	2	22
Spri	3	12	1	19	2	2	1	0	1	3	3	3	4	4	3	1	1	23	4	3	1	1	2	1	2	2	1	1	1	2	2	2	2	1	2	3	2	1	1	4	1	2	2	2	4	2
Spri	3	12	1	19	1	1	1	1	0	1	4	3	1	4	3	0	0	17	2	3	1	1	1	1	2	1	1	1	1	2	1	2	1	1	1	1	1	3	1	3	1	2	2	1	3	1
Spri	3	12	1	18	2	1	1	2	2	1	4	4	0	2	4	1	0	20	2	2	3	1	2	2	4	2	2	2	1	4	3	3	2	1	4	4	3	4	4	4	3	3	4	3	4	4
Spri	3	12	1	18	1		1	3	2	2	3	2	2	3	3	2	2	24	4	3	1	1	1	2	3	1	1	1	1	3	3	2	1	2	3	2	4	2	1	2	1	2	2	2	2	1
Spri	3	12	1	19	1	1	1	2	2	1	4	4	1	2	3	2	1	22	4	3	1	3	1	1	3	1	1	1	3	2	2	4	1	1	4	4	4	4	2	4	1	3	4	2	4	1
Spri	3	12	1	18	1	1	1	1	1	2	3	3	1	3	3	1	1	19	3	2	1	1	2	1	2	1	1	2	1	2	2	2	2	1	2	2	3	2	1	1	2	3	2	2	1	2
Spri	3	12	1	18	2	1	1	2	1	2	3	2	1	3	2	1	1	18	3	3	1	1	1	1	3	1	1	1	1	3	1	2	1	1	1	1	3	3	1	1	1	1	3	1	1	1
Spri	3	12	1	19	1	2	1	2	2	3	3	2	3	1	3	3	2	24	4	2	1	1	3	2	2	1	3	3	1	4	3	2	3	1	4	1	4	3	3	2	2	4	3	2	2	1
Spri	3	12	1	21	2	4	1	1	1	2	4	3	1	3	3	1	1	20	2	3	1	1	4	1	3	1	1	3	1	4	2	3	3	1	3	2	1	2	2	1	3	2	3	1	1	1
Spri	3	12	1	20	2	2	1	3	2	2	4	3	0	4	4	1	1	24	2	2	1	1	3	1	4	1	1	3	1	4	1	3	2	1	3	2	3	4	1	1	3	3	3	1	1	3
Spri	3	12	1	20	2	3	1	3	3	4	2	2	2	4	1	4	3	28	4	2	3	2	3	4	2	1	2	3	2	2	3	2	3	3	4	4	4	4	2	1	3	2	1	3	1	4
Spri	3	12	1	18	1	3	1	1	2	1	3	3	1	4	3	2	2	22	4	4	1	1	2	1	4	1	1	2	1	2	3	3	2	1	3	2	2	4	2	4	2	3	3	3	4	1
Spri	3	12	1	18	2	1	1	3	3	4	3	2	2	4	2	2	3	28	3	2	1	1	1	2	4	1	1	1	1	3	4	4	2	1	4	1	3	1	1	1	1	3	3	4	1	1
Spri	3	12	1	20	2	2	1	2	2	3	2	3	3	4	2	3	2	26	3	3	1	2	3	1	3	1	1	2	2	2	2	2	3	1	3	2	2	2	1	2	3	3	2	2	2	1
Spri	3	12	1	19	1	2	1	1	0	3	4	3	0	4	3	2	0	20	2	4	1	3	3	1	4	1	1	1	1	2	3	4	4	1	4	4	3	1	2	1	2	1	1	4	1	1
Spri	3	12	1	18	1	2	1	2	1	3	4	3	0	4	3	0	2	22	4	3	1	1	1	1	2	1	1	1	1	3	2	2	1	1	4	2	3	4	2	4	1	3	3	1	3	2
Spri	3	12	1	18	2	1	1	1	2	3	4	4	1	4	4	1	0	24	2	1	1	1	2	1	2	1	1	3	1	3	2	1	3	1	4	3	3	3	1	3	2	3	1	1	3	4
Spri	3	12	1	19	2	2	1	2	0	2	4	4	1	4	4	1	1	23	4	4	1	1		1	3	1	2	3	1	4	2	3	3	1	4	2	2	4	2	2	3	4	4	1	2	1
Fall	2	5	1	22	2	4	1	4	2	4	3	2	1	2	2	3	2	25	3	3	1	1	2	1	3	2	3	2	1	2	2	3	3	2	4	2	4	3	2	4	2	2	2	2	4	1
Fall	2	5	1	18	2	2	1	2	1	4	3	2	1	3	3	2	1	22	2	2	1	1	2	1	3	1		2	1	3	1	2	2	1	3	2	2	3	2	4	2	2	4	2	4	2
Fall	2	5	1	22	1		1	4	3	2	2	3	0	1	2	4	3	24	4	2	1	3	1	3	3	1	4	1	2	4	2	3	1	1	4	4	1	1	1	1	1	4	4	4	1	4
Fall	2	5	1	24	1		1	3	2	3	4	2	2	2	3	2	2	25	4	2	1	1	3	1	4	1	2	3	1	2	1	1	3	1	2	4	1	1	1	1	1	4	2	1	1	4
Fall	2	5	1	19	2	2	1	2	3	2	2	2	3	2	2	3	2	23	4	3	2	2	1	1	3	3	2	1	2	3	3	3	1	2	2	4	4	3	2	4	3	3	4	3	4	3
Fall	2	5	1	19	2	2	1	2	2	3	2	3	2	2	2	2	2	22	2	2	1	1	3	2	2	1	3	3	1	1	3	2	4	2	2	2	3	2	2	4	3	2	4	2	3	1
Fall	2	5	1	23	2	3	1	4	3	3	2	2	2	2	2	4	3	27	4	4	1	2	4	1	3	1	2	4	2	3	3	3	4	1	3	3	4	3	3	3	4	3	3	1	2	2
Fall	2	5	1	20	2	3	1	3	3	4	2	2	3	1	2	2	3	25	4	2	3	2	3	3	2	1	2	3	2	2	3	2	4	2	1	3	3	3	4	1	3	3	3	1	1	4
Fall	2	5	1	22	2		1	2	2	2	3	3	3	3	2	2	3	25	3	2	1	4	3	1	2	1	1	2	4	2	2	2	2	1	2	3	3	2	2	2	2	2	2	1	2	2
Fall	2	5	1	19	1	2	1	0	0	1	4	4	0	4	4	0	0	17	1	2	1	1	2	1	2	1	1	2	1	1	1	2	2	1	3	1	2	2	1	2	2	2	2	1	2	1
Fall	2	5	1	19	2	2	1	2	2	3	3	2	3	3	2	2	2	24	2	3	1	1	4	2	3	1	2	4	1	4	2	3	4	2	3	3	4	3	2	3	4	3	3	3	4	1
Fall	2	5	1	20	1	3	.	3	3	3	2	2	0	2	2	3	2	22	3	4	1	1	3	1	3	2	2	2	1	4	3	3	3	1	3	2	2	3	2	2	2	4	4	3	2	1
Fall	2	5	1	19	1	3	1	3	2	3	3	1	2	2	2	3	3	24	2	3	1	1	2	2	4	1	3	2	1	4	3	3	2	1	3	2	4	4	1	3	2	4	4	3	2	1
Fall	2	5	1	20	2		2	3	3	3	2	4	2	2	2	4	2	27	1	1	2	1	3	3	3	2	1	3	1	3	2	3	2	1	3	3	3	4	2	2	2	4	4	1	2	1
Fall	2	5	1	27	2		1	3	4	4	3	4	3	3	4	2	1	31	1	1	1	1	2	4	1	1	1	1	4	1	2	4	1	1	4	3	1	1	1	3	3	3	4	1	2	1
Fall	2	5	1	19	2	2	1	1	1	2	4	3	1	4	2	1	0	19	3	3	1	1	1	1	3	1	1	2	1	2	1	3	2	1	2	3	2	2	1	2	3	2	2	1	1	1
Fall	2	5	1	22	2	4	1	2	2	2	2	3	2	3	2	2	1	21	2	3	1	3	2	1	3	1	1	2	3	3	2	3	2	1	3	1	2	2	2	3	2	3	2	2	4	1
Fall	2	5	1	21	2	4	1	3	3	4	3	3	1	4	4	1	1	27	1	1	1	1	1	1	4	1	2	1	1	2	1	1	2	1	2	1	1	1	1	1	1	1	1	1	1	1
Fall	2	5	1	20	2	3	1	4	3	4	3	2	2	3	3	4	4	32	2	4	1	1	2	1	4	1	2	2	1	2	1	4	2	1	3	2	3	3	2	2	2	2	4	1	3	1
Fall	2	5	1	22	2	4	1	1	1	2	3	3	1	3	2	1	2	19	4	3	3	3	4	2	3	1	3	3	1	4	4	3	4	1	4	4	4	3	2	2	3	3	3	2	1	3
Fall	2	5	1	30	2	3	1	1	1	2	4	3	2	2	2	2	2	21	2	4	1	1	2	1	4	1	2	2	2	2	3	4	3	1	2	4	4	4	2	2	1	4	4	2	1	1
Fall	2	5	1	19	2	2	1	1	2	3	3	2	1	2	2	2	1	19	4	4	1	2	2	2	3	1	2	3	2	4	2	3	3	1	4	2	1	4	3	1	3	4	2	3	1	1
Fall	2	5	1	19	2	2	1	1	1	2	4	4	1	4	4	2	2	25	4	4	1	1	4	1	4	1	4	4	1	4	2	4	4	1	4	1	4	1	4	4	4	2	4	1	2	1
Fall	2	5	1	20	1	2	1	1	0	1	4	3	0	4	3	0	0	16	1	2	1	1	1	1	2	1	1	1	1	1	1	1	1	1	1	1	1	1	1	1	1	1	1	1	3	2
Fall	2	5	1	19	1	2	1	4	3	4	4	3	3	1	0	2	4	28	2	2	1	4	2	2	2	1	3	1	3	2	1	2	1	2	1	2	4	3	1	4	1	3	2	1	3	1
Fall	2	5	1	19	2	3	1	2	1	3	4	3	4	2	2	3	2	26	2	2	1	1	1	1	3	1	1	2	1	3	2	2	2	1	2	1	3	2	1	1	2	1	2	1	1	1
Fall	2	5	1	21	2	4	1	3	2	4	2	2	2	2	3	3	2	25	2	1	1	1	3	2	2	1	3	3	1	1	1	2	3	2	2	2	2	2	3	1	3	2	2	1	1	2
Fall	2	5	1	23	1	4	1	3	2	2	4	2	3	2	3	2	0	23	3	3	2	1	2	1	3	1	1	2	1	2	2	3	2	1	2	3	2	2	2	2	2	2	2	2	4	3
Fall	2	5	1	21	2		1	1	1	2	2	3	1	1	3	1	0	15
Fall	2	5	1	20	2	3	1	3	2	4	3	3	0	2	2	4	0	23
Fall	2	5	1	20	2	3	1	3	2	1	4	3	1	4	4	1	1	24
Fall	2	1	1	20	2	3	1	1	1	3	4	2	1	3	3	2	1	21	2	3	1	1	1	1	4	1	1	2	1	3	2	3	2	1	3	2	4	3	2	1	2	2	3	2	1	2
Fall	2	1	1	21	2	4	1	0	0	4	4	3	0	4	2	0	0	17	3	2	1	1	2	1	2	1	1	1	1	2	2	2	1	1	2	2	2	2	1	2	1	2	1	1	2	1
Fall	2	1	1	18	2	1	1	3	2	3	1	1	2	2	3	3	2	22	4	2	1	1	2	3	3	1	1	1	1	4	2	2	3	1	2	1	3	1	1	2	2	1	2	1	2	1
Fall	2	1	1	21	2	4	1	3	4	4	3	2	3	1	2	4	4	30	3	4	1	1	4	1	4	1	4	4	1	4	3	4	4	1	4	1	4	4	1	2	4	4	4	1	4	1
Fall	2	1	1	20	2	3	1	3	1	3	3	3	2	3	3	2	1	24	4	4	1	1	3	1	3	1	1	1	1	2	2	3	3	1	1	1	3	3	3	1	3	4	3	2	1	1
Fall	2	1	1	19	2	2	1	1	0	3	2	4	0	4	0	0	4	18	4	1	1	1	1	1	1	1	1	1	1	1	2	1	1	1	2	2	2	1	1	1	1	1	1	1	1	2
Fall	2	1	1	21	2		1	2	3	4	2	2	1	2	2	2	2	22	3	2	1	1	1	1	2	1	2	2	1	2	2	3	3	1	2	1	1	2	2	1	2	3	2	1	1	1
Fall	2	1	1	20	1	3	1	1	0	1	4	3	0	4	3	1	0	17	2	3	1	1	2	1	3	1	1	2	1	2	2	3	2	1	3	1	1	3		1	2	2	3	1	1	1
Fall	2	1	1	19	2	2	1	1	1	2	3	3	1	3	3	1	1	19	2	3	1	1	2	1	3	1	1	2	1	2	1	2	2	1	3	2	2	2	2	2	1	2	2	1	2	1
Fall	2	1	1	24	2	4	1	2	2	2	4	3	1	3	4	1	0	22	3	3	1	1	2	1	4	1	2	2	1	4	1	4	2	1	4	3	3	4	2	2	2	4	3	1	2	1
Fall	2	1	1	19	2	3	1	3	3	4	3	2	3	2	4	3	2	29	4	4	2	1	2	2	4	2	4	3	1	4	1	4	2	1	4	4	2	4	3	1	3	4	4	2	1	2
Fall	2	1	1	20	1	3	1	1	2	2	4	3	0	3	4	1	0	20	4	3	1	1	2	1	4	1	4	2	1	4	3	4	2	1	4	4	3	4	1	1	4	3	4	1	1	4
Fall	2	1	1	21	2	4	1	1	1	2	3	2	3	3	3	2	1	21	2	3	1	1	3	1	3	1	2	3	1	4	2	2	2	1	3	3	4	2	3	2	2	3	1	1	2	1
Fall	2	1	1	21	2	4	1	3	2	4	2	2	3	4	2	4	3	29	4	4	1	1	2	2	3	1	1	3	1	3	3	3	2	1	1	1	3	1	3	3	1	1	3	2	3	1
Fall	2	1	1	21	2	4	1	1	2	2	4	2	0	1	1	0	0	13	2	3	1	2	3	3	3	1	2	3	1	4	2	2	2	1	4	4	4	4	2	4	3	2	2	2	4	4
Fall	2	1	1	21	2	4	1	2	3	4	3	2	4	3	3	3	4	31	4	4	2	3	2	2	4	1	2	2	3	4	1	4	2	1	4	4	4	3	2	4	3	2	4	2	4	4
Fall	2	1	1	20	2	2	1	2	3	4	3	4	2	2	2	2	2	26	2	3	1	1	2	1	3	1	2	2	1	2	3	3	2	1	3	2	4	3	2	4	3	2	2	4	4	3
Fall	2	1	1	19	2	2	1	2	3	4	3	3	3	3	3	3	3	30	3	3	2	1	3	1	4	1	3	4	1	4	2	3	4	1	3	4	4	4	4	3	4	3	4	2	2	3
Fall	2	1	1	18	2	3	1	3	2	3	4	3	3	3	3	1	1	26	2	3	1	1	3	1	3	1	3	4	1	3	1	3	4	1	3	4	4	4	4	3	4	4	4	1	2	3
Fall	2	1	1	19	2	2	1	2	1	3	4	3	1	4	4	3	1	26	4	4	1	1	3	1	3	1	1	2	1	3	2	3	3	1	3	2	3	3	3	4	3	4	4	1	4	2
Fall	2	1	1	20	2	4	1	2	3	4	2	2	2	2	3	4	4	28	2	3	1	1	2	1	3	1	1	2	1	3	2	3	2	1	4	1	1	2	2	3	2	3	3	1	3	1
Fall	2	1	1	21	2	4	1	2	2	2	4	2	2	3	2	1	1	21	2	3	1	2	2	1	4	1	1	1	1	2	2	3	1	1	3	1	2	4	2	3	1	3	4	2	4	1
Fall	2	1	1	19	2	2	1	1	2	3	3	3	2	3	3	1	1	22	4	3	2	1	3	1	1	2	1	2	1	4	2	3	3	2	3	1	4	3	2	3	2	4	2	2	4	1
Fall	2	1	1	24	1	3	1	1	1	2	3	3	2	4	3	2	1	22	2	4	2	1	3	2	4	1	1	2	1	2	2	3	2	1	2	2	2	1	1	2	2	2	1	1	2	2
Fall	2	1	1	21	2	4	1	0	2	2	2	3	0	1	4	2	0	16	2	1	1	1	2	2	3	2	1	1	1	1	1	2	1	1	3	1	3	4	1	1	3	3	2	2	1	1
Fall	2	1	1	19	2	2	1	3	3	4	4	2	1	2	2	4	3	28	4	4	1	1	3	1	4	2	2	2	1	4	3	4	4	1	4	4	4	4	2	4	2	1	4	2	4	4
Fall	2	1	1	22	2	4	1	3	2	2	1	1	2	2	1	2	2	18	4	2	1	2	1	3	1	1	2	1	2	2	2	1	1	2	1	2	3	2	1	1	1	4	4	4	1	1
Fall	2	1	1	21	2	4	1	1	1	2	4	3	2	3	3	1	2	22	4	4	1	1	3	1	4	1	1	4	1	4	3	4	4	1	4	1	2	4	3	1	4	3	4	4	2	1
Fall	2	1	1	21	2	4	1	2	2	4	3	3	3	2	4	2	3	28
Fall	2	1	1	24	2	3	.	2	3	4	3	2	3	2	2	1	2	24
Fall	2	1	1	22	2	4	1	2	2	3	4	3	2	3	3	2	2	26
Fall	2	3	1	26	1	4	1	3	3	2	4	2	2	3	4	3	1	27
Fall	2	3	1	20	2	3	1	1	0	2	4	4	0	4	4	0	0	19	3	2	1	1	4	1	3	1	1	3	1	4	1	3	3	1	3	3	1	1	1	2	3	1	3	1	1	1
Fall	2	3	1	19	2	2	1	2	1	3	3	1	2	3	2	2	2	21	3	2	2	1	2	2	3	2	2	2	1	3	1	2	2	1	3	4	3	2	3	4	2	2	3	1	4	1
Fall	2	3	1	19	2	2	1	2	2	2	4	4	2	3	3	1	1	24	3	3	1	1	4	1	3	2	3	4	1	3	3	3	4	1	4	3	3	2	1	1	4	4	4	1	1	1
Fall	2	3	1	19	2	2	1	1	0	1	4	3	1	4	3	1	0	18	1	1	1	1	1	1	4	2	1	1	1	3	1	4	1	1	4	1	1	1	1	2	1	2	3	1	1	1
Fall	2	3	1	23	2	3	1	3	4	4	1	1	0	2	2	1	3	21	2	3	1	1	1	2	4	1	1	1	1	3	3	3	1	1	3	1	1	3	1	1	1	4	4	2	1	1
Fall	2	3	1	19	2	2	1	3	3	4	4	1	2		1	1	3
Fall	2	3	1	20	2	3	1	1	1	3	1	0	1	2	0	4	4	17
Fall	2	3	1	20	2	3	1	4	4	3	1	2	2	2	2	4	3	27	4	2	2	3	2	4	2	3	2	2	2	3	3	2	4	2	2	3	2	2	4	3	3	3	2	3	2	2
Fall	2	3	1	19	2	2	1	0	1	2	4	4	0	4	4	0	0	19	2	1	1	1	1	1	1	1	1	1	1	1	1	1	1	1	1	1	1	1	1	1	1	2	1	1	1	1
Fall	2	3	1	20	2	3	1	4	4	4	2	1	3	1	1	2	3	25	4	2	1	1	3	2	2	2	2	2	1	2	2	2	4	2	2	1	3	2	2	2	3	2	2	2	1	1
Fall	2	3	1	21	2	3	1	4	3	3	2	2	2	2	2	2	2	24	2	3	3	3	2	3	4	2	3	1	2	3	4	2	2	2	3	4	3	3	3	2	2	3	3	4	1	4
Fall	2	3	1	22	2	4	1	2	2	2	3	3	2	2	2	3	1	22	3	2	1	1	4	2	3	3	2	3	1	3	2	2	3	2	3	1	4	3	3	2	3	3	2	2	1	1
Fall	2	3	1		1		1	2	0	3	4	3	0	1	4	1	0	18	3	4	1	1	4	1	3	1	1	1	1	4	3	4	2	1	4	4	2	3	1	4	4	4	4	1	4	1
Fall	2	3	1	19	2	2	1	4	4	4	4	0	4	2	2	1	4	29	4	4	1	1	4	3	2	4	2		1	4	3	4	4	4	4	1	4	4	4	1	4	2	2	3	1	1
Fall	2	3	1	25	2	4	1	2	1	2	2	3	2	2	3	3	2	22	3	4	1	1	4	2	3	2	3	3	1	3	3	3	3	1	2	2	4	3	3	1	3	4	3	2	3	1
Fall	2	3	1	20	2	3	1	1	1	3	3	3	1	3	3	2	1	21	2	1	1	1	2	2	3	1	2	1	1	2	2	2	2	2	3	2	3	3	2	1	1	2	2	2	1	1
Fall	2	3	1	19	2		1	1	1	2	2	2	1	3	2	0	0	14	1	2	1	1	4	1	2	1	1	3	1	2	1	2	3	1	3	1	2	2	2	1	3	2	2	1	1	1
Fall	2	3	1	18		1	.	2	1	2	3	2	2	4	3	1	1	21
Fall	2	3	1	19	1	2	1	1	1	2	4	4	2	3	4	3	3	27	2	3	1	1	2	1	4	1	1	4	1	4	1	4	4	1	4	1	3	4	1	1	4	4	4	1	3	1
Fall	2	3	1	23	2		1	2	1	3	4	2	2	3	3	1	1	22	2	3	1	2	3	1	4	2	1	3	2	4	1	4	4	1	4	1	4	4	4	4	4	4	4	1	4	1
Fall	2	3	1	20	1	3	1	3	1	3	4	3	2	3	3	2	2	26	3	3	1	1	2	1	3	1	2	2	1	3	2	3	2	1	3	2	2	3	2	2	3	3	3	2	3	2
Fall	2	3	1	20	2	3	1	2	2	4	3	2	2	2	1	3	2	23	4	3	2	1	3	2	3	2	2	3	1	3	2	3	3	1	2	2	3	3	2	2	3	3	3	3	2	2
Fall	2	3	1	21	2	3	1	3	2	2	2	1	2	2	2	2	2	20	1	1	1	2	2	2	1	1	1	2	2	2	4	2	2	1	1	1	4	2	2	1	2	1	1	3	1	1
Fall	2	3	1	21	2	4	1	2	2	2	3	2	2	2	3	2	2	22
Fall	2	3	1	19	1	2	1	2	2	2	2	2	2	2	2	2	2	20
Fall	2	3	1	19	1	2	1	2	2	3	2	1	1	3	2	2	1	19
Fall	2	3	1	27	2	3	1	1	0	2	4	3	1	3	4	2	1	21	1		1	2	2	1	4	1	1	2	2	4	1	4	2	1	4	2	2	1	2	2	2	1	4	2	2	1
Fall	2	3	1	20	2	3	1	3	2	3	2	2	2	3	2	1	2	22	2	3	1	1	3	2	2	1	1	3	1	3	3	3	3	1	2	3	1	3	2	1	3	2	3	3	1	2
Fall	2	3	1	19	2	2	1	2	2	2	3	2	1	3	1	1	2	19	3	3	1	1	2	1	2	1	2	2	1	3	2	3	2	1	2	2	2	1	2	1	2	2	3	1	3	2
Spri	2	1	1	23	2	3	1	2	2	3	3	2	2	2	2	3	1	22	4	3	3	3	3	1	4	2	2	2	3	4	3	4	3	1	3	1	3	4	2	2	2	2	4	3	2	1
Spri	2	1	1	29	2	3	1	1	1	1	4	2	1	3	1	1	1	16	1	4	1	1	1	1	4	1	1	2	2	4	1	4	1	1	4	4	2	4	4	2	1	4	4	1	3	4
Spri	2	1	1	19	1	2	1	2	1	1	3	1	1	1	2	3	1	16	2	1	1	1	1	3	2	3	1	1	1	3	1	2	1	1	4	3	4	2	1	1	1	1	1	1	1	3
Spri	2	1	1	25	2	4	2	2	2	1	3	3	2	2	2	2	1	20	2	3	1	1	2	2	4	2	2	3	1	4	4	4	4	1	4	4	4	4	3	3	3	2	3	2	4	3
Spri	2	1	1	25	1	3	1	3	3	4	2	2	1	2	2	2	2	23	2	2	1	2	1	1	3	1	1	1	2	1	3	2	1	1	2	2	2	2	1	1	1	2	2	1	1	2
Spri	2	1	1	21	1	4	1	1	1	2	4	2	1		3	1	1		4	3	1	1	3	1	4	1	1	3	1	4	3	3	3	1	4	3	4	4	2	3	4	4	3	1	4	4
Spri	2	1	1	21	1	4	1	3	2	4	4	2	2	3	1	2	3	26	4	3	4	2	1	3	2	4	1	1	4	3	2	3	4	4	4	1		3	3	4	4	2	1	2	3	3
Spri	2	1	1	19	2	2	1	2	3	3	1	2	3	2	1	2	2	21	2	2	3	1	2	2	2	3	2	2	1	2	3	2	2	3	3	2	1	2	2	2	2	2	2	3	2	2
Spri	2	1	1	23	1	4	1	2	3	4	1	2	3	2	1	4	4	26	3	3	4	4	3	4	2	3	2	2	4	2	3	2	2	3	2	3	3	1	1	1	2	1	2	2	2	2
Spri	2	1	1	21	2	4	1	2	3	3	3	3	1	3	4	1	2	25	2	3	1	1	1	1	2	1	1	2	1	2	1	1	1	1	2	1	2	2	1	1	1	2	1	1	3	1
Spri	2	1	1	23	1	4	1	0	0	2	3	3	0	3	3	3	1	18	3	2	1	1	1	1	1	1	1	1	1	1	2	1	1	1	1	1	1	1	2	3	1	1	1	1	2	1
Spri	2	1	1	21	2	4	1	2	0	2	4	4	0	4	4	1	0	21	2	3	1	1	2	1	4	1	1	2	1	3	1	4	3	1	4	3	3	1	1	3	3	2	3	1	2	1
Spri	2	1	1	21	1	4	1	2	1	3	4	3	1	3	3	3	1	24	4	4	1	1	4	1	4	1	1	4	1	4	1	4	4	1	4	2	3	2	2	4	4	4	4	1	4	3
Spri	2	1	1	29	2	3	1	0	0	2	4	4	0	4	4	0	0	18	1	2	1	1	2	1	2	1	1	3	1	1	1	2	2	1	1	1	1	2	1	1	1	2	2	1	1	1
Spri	2	1	1	19	2	1	1	1	1	2	3	3	1	1	3	2	2	19	2	3	2	4	2	1	1	3	4	2	1	3	4	2	2	2	3	4	4	2	3	1	1	2	3	1	1	1
Spri	2	1	1	18	1	1	1	1	2	3	3	1	0	1	2	2	1	16	2	2	1	3	1	1	2	1	1	1	3	2	3	2	1	1	2	3	3	3	1	1	1	4	2	3	1	3
Spri	2	1	1	20	2	2	1	0	1	2	2	2	1	3	3	2	2	18	3	3	1	1	2	1	4	1	2	3	1	4	1	3	3	1	3	1	2	3	1	4	4	4	2	1	4	1
Spri	2	1	1	24	1	4	1	2	2	2	2	2	2	2	2	2	2	20	4	4	2	1	4	1	4	2	1	4	1	4	2	4	4	1	4	4	4	4	2	4	4	4	4	2	4	4
Spri	2	1	1	18	2	1	1	3	2	3	3	1	3	1	3	2	1	22	2	3	1	2	3	3	3	1	2	3	2	1	1	1	2	2	3	1	3	2	3	3	2	1	1	1	1	3
Spri	2	1	1	19	2	2	1	1	1	2	3	4	1	3	4	1	1	21
Spri	2	1	1	18			1	0	0	4	0	0	4	4	0	0	4	16	4	3	1	4	4	1	4	1	1	4	1	3	3	4	4	1	4	3	4	4	1	1	3	1	4	1	1	1
Spri	2	1	1	20	2	4	1	1	1	2	4	3	1	3	4	2	2	23	2	2	1	1	2	1	3	1	1	3	1	3	1	2	3	1	3	1	2	1	1	2	2	1	1	1	2	1
Spri	2	1	1	19	2	1	1	2	1	3	3	3	1	3	3	2	1	22	3	3	2	1	2	1	4	1	3	2	1	3	3	3	2	1	3	2	3	3	3	1	2	3	2	2	1	3
Spri	2	1	1	21	2	3	1	3	1	3	3	2	2	2	3	3	3	25	2	2	2	1	1	1	3	2	2	2	1	1	3	2	1	2	2	2	2	2	3	1	1	3	1	2	2	3
Spri	2	1	1	22	2		1	2	2	3	2	3	1	2	2	2	2	21	2	4	1	1	2	1	4	1	1	2	1	4	1	4	1	1	4	1	3	1	2	1	1	2	2	1	1	2
Spri	2	1	1	23	2	3	1	2	1	3	3	3	0	3	3	1	1	20	4	4	1	1	1	1	3	1	1	1	2	3	1	3	3	1	3	1	2	3	1	1	2	2	3		2	1
Spri	2	2	1	22	2	4	1	2	2	1	3	2	2	2	3	2	2	21	1	3	2	1	2	1	1	1	2	2	1	2	1	2	2	1	3	2	2	2	2	2	2	2	4	1	3	2
Spri	2	2	1	18	2	1	1	3	3	3	2	1	2	2	3	3	2	24	3	2	2	2	1	1	2	1	1	1	1	4	3	3	3	1	3	1	2	2	3	1	1	4	3	3	1	1
Spri	2	2	1	22	2	4	1	1	2	3	4	4	2	3	4	1	2	26	4	4	1	1	3	2	4	1	1	3	1	4	2	3	3	1	4	3	4	4	2	2	1	4	2	1	1	2
Spri	2	2	1	22	2		2	2	2	3	3	3	3	3	3	3	3	28	2	2	2	2	2	1	2	3	1	2	1	3	4	1	2	1	2	2	2	3	2	2	2	2	2	2	2	2
Spri	2	2	1	20	2	3	1	2	1	1	4	3	0	3	3	1	0	18	3	4	1	1	2	1	3	1	1	2	1	3	3	4	2	1	4	1	2	3	2	1	2	2	3	2	3	1
Spri	2	2	1	20	2	2	1	3	2	2	2	2	2	2	2	3	3	23	2	2	1	1	2	1	3	1	2	2	1	3	2	3	3	1	3	2	3	1	2	3	2	2	2	2	3	1
Spri	2	2	1	20	2	2	1	1	0	2	4	3	1	4	2	1	0	18	1	2	1	1	1	1	3	1	1	2	1	1	3	2	2	1	1	3	1	1	1	1	1	1	3	1	1	3
Spri	2	2	1	20	2	3	1	2	4	1	4	3	0	4	2	3	1	24	3	2	1	1	2	1	4	1	1	1	1	2	1	3	1	1	3	4	4	4	1	3	1	4	4	1	4	1
Spri	2	2	1	20	2	2	1	2	2	2	3	2	1	3	2	2	2	21	3	2	1	2	3	2	2	1	2	3	2	2	2	2	2	1	3	2	3	2	3	3	3	3	2	2	3	1
Spri	2	2	1	26	2	4	1	4	4	4	2	2	4	3	2	4	4	33	2	4	3	2	1	1	4	1	4	2	2	4	4	4	2	1	3	3	4	4	2	4	4	3	4	2	4	3
Spri	2	2	1	21	2	3	1	2	2	2	4	2		3	3	2	2		4	3	1	1	1	1	4	2	2	2	1	4	1	4	3	1	3	2	4	4	1	3	2	4	4	1	3	2
Spri	2	2	1	20	2	3	1	1	0	2	3	3	1	3	3	1	0	17	1	3	1	1	1	1	1	1	1	2	1	2	2	1	2	1	1	1	2	2	1	3	1	3	1	1	3	1
Spri	2	2	1	23	2	4	1	2	1	3	2	3	2	1	3	2	1	20	1	2	1	1	4	1	2	1	3	4	1	1	3	3	4	1	2	1	4	3	2	3	4	4	2	2	2	1
Spri	2	2	1	22	2	4	1	0	0	1	3	3	0	2	3	0	1	13	2	3	2	2	1	1	3	1	1	1	1	2	2	1	1	1	2	1	2	1	1	1	1	1	1	1	3	1
Spri	2	2	1	19	2	1	1	2	1	1	4	3	1	2	3	1	1	19	2	2	1	1	3	2	3	2	3	3	1	3	2	3	3	1	3	3	2	3	2	4	3	2	2	2	4	2
Spri	2	2	1	22	2	4	1	2	2	3	3	1	0	4	2	1	3	21	2	3	1	1	2	1	4	1	2	3	1	4	3	4	2	1	4	1	2	4	1	3	2	4	4	3	3	1
Spri	2	2	1	19	1	1	1	0	0	2	4	2	0	0	2	0	0	10
Spri	2	2	1	20	1	2	1	2	2	2	3	1	2	2	2	3	3	22	3	3	1	1	2	1	3	2	4	2	1	2	3	2	3	1	2	3	2	3	2	1	2	2	2	3	1	2
Spri	2	2	1	24	1	3	1	1	0	2	3	3	3	2	2	2	1	19	2	4	2	1	1	2	3	1	3	3	1	4	1	3	2	2	3	2	2	3	2	1	3	3	2	2	1	3
Spri	2	2	1	18	2	1	1	2	3	3	3	3	3	4	3	1	2	27	2	3	1	2	3	1	3	1	1	3	2	3	2	3	3	1	1	1	2	3	1	2	3	2	1	2	3	1
Spri	2	2	1	22	2	2	1	2	0	1	4	3	0	3	3	0	1	17	2	4	1	1	2	1	4	1	3	2	1	4	2	4	3	1	4	2	2	2	1	1	2	1	2	1	4	2
Spri	2	2	1	18	2	2	1	3	3	3	2	2	3	2	2	2	3	25	2	2	2	1	3	3	3	2	3	3	1	2	3	2	3	2	2	3	2	2	3	1	2	2	2	3	1	2
Spri	2	2	1	19	1	1	1	1	1	1	3	3	1	3	3	1	1	18	2	3	3	2	2	3	3	2	2	3	2	3	2	2	3	2	3	2	3	2	3	2	3	3	2	2	3	2
Spri	2	2	1	21	2	4	1	2	2	3	3	2	0	3	2	2	2	21	1	4	1	1	3	1	4	1	2	3	1	3	4	4	2	1	1	2	3	3	2	4	2	1	4	3	4	1
Spri	2	2	1	22	1	4	2	2	2	3	3	3	2	2	3	3	2	25	2	3		2	3	1	3	1	1	3	1	3	3	3	3	1	4	3	3	3	2	4	4	3	3	3	4	3
Spri	2	2	1	20	1	2	1	2	2	2	4	1	1	3	3	4	2	24	3	4	4	1	1	1	4	2	1	2	1	4	1	4	1	1	4	4	4	4	1	1	3	2	4	1	4	4
Spri	2	2	1	19	2	3	1	2	2	1	3	3	0	3	4	2	1	21	4	2	1	2	3	1	4	1	2	3	2	4	2	4	3	1	4	2	4	4	2	2	3	3	4	2	2	2
Spri	2	4	1	20	2	4	2	3	2	3	2	3	1	0	3	3	2	22	2	3	1	1	2	1	3	1	3	3	1	2	2	2	3	1	2	2	1	2	2	1	2	3	2	2	1	2
Spri	2	4	1	21	2	4	1	2	3	3	4	3	0	2	3	2	1	23	2	2	1	1	1	1	2	1	3	3	1	2	3	3	2	1	4	4	3	3	3	3	3	3	4	3	3	4
Spri	2	4	1	19	2	2	1	2	1	2	0	3	1	3	4	2	0	18	2	3	2	1	2	1	2	1	1	4	1	2	1	4	3	1	3	3	4	3	1	2	3	2	3	1	3	2
Spri	2	4	1	21	2	3	1	2	3	3	3	2	1	2	2	3	1	22	4	4	2	2	1	1	3	2	3	1	2	3	2	3	1	1	2	2	2	3	3	3	1	2	3	2	3	2
Spri	2	4	1	18	1	1	1	0	1	1	1	3	1	1	4	1	3	16	3	2	2	2	1	3	2	3	2	1	2	2	3	4	4	1	3	4	4	3	2		4	4	3	3	2	2
Spri	2	4	1	12	1	1	1	2	2	2	2	2	2	2	2	2	2	20	3		2	2	2	2	2	2	2	2	2	2	2	3	3	3	3	3	3	3	3	3	3	3	3	3	3	3
Spri	2	4	1	19	1	2	1	4	0	3	4	4	0	4	4	0	0	23	4	4	1	1	4	1	4	1	4	4	1	4	4	4	4	1	4	4	4	4	1	4	4	4	4	1	4	4
Spri	2	4	1	19	1	1	1	2	2	1	2	2	2	2	2	2	2	19	2	2	2	2	2	2	2	2	2	2	2	2	2	2	2	2	2	2	2	2	2	2	2	2	2	2	2	2
Spri	2	4	1	26	2	4	1	2	1	4	4	2	1	2	2	2	1	21	2	2	1	1	1	1	3	2	2	1	1	1	2	2		1	2	1	3	3	2	2	1	3	3	3	3	1
Spri	2	4	1	20	2	2	1	0	0	0	0	3	0	3	3	0	0	9	1	4	1	1	1	1	2	1	1	1	1	1	1	1	1	1	3	1	2	2	1	1	1	2	1	1	4	4
Spri	2	4	1	19	2	2	1	3	3	3	2	1	3	2	2	4	4	27	3	2	3	1	1	2	1	2	1	1	1	2	4	3	2	2	2	4	3	3	3	1	1	2	2	3	1	3
Spri	2	4	1	19	2	2	2	4	3	4	2	2	2	4	2	4	4	31	4	2	4	2	2	3	2	3	4	2	2	2	4	3	2	4	3	4	4	4	4	3	4	3	1	4	1	4
Spri	2	4	1	19	1	1	1	2	2	2	1	1	2	1	2	2	2	17	3	3	3	2	3	2	3	2	3	3	3	2	3	2	3	1	2	3		2	3	3	2	3	3	3	2	3
Spri	2	4	1	20	2	2	1	1	1	2	1	1	1	4	3	1	1	16	2	2	2	2	2	3	2	2	1	1	1	1	1	1	1	1	1	1	1	1	1	3	2	3	4	3	2	2
Spri	2	4	1	20	2	2	1	0	0	2	3	4	3	4	3	0	0	19	2	3	1	1	1	1	3	1	1	2	1	2	1	3	2	1	3	1	1	1	1	4	2	3	1	1	4	1
Fall	1	1	1	24	1	3	1	4	0	4	4	4	1	4	4	4	2	31	4	4	1	2	4	1	4	1	2	3	1	4	2	4	4	1	4	3	1	4	2	4	2	4	4	2	4	2
Fall	1	1	1	19	2	2	1	2	2	3	3	3	3	3	3	2	2	26	3	2		1	2	2	2	2	2	2	1	2	4	2	2	2	3	1	1	2	2	2	2	2	2	4	2	2
Fall	1	1	1	21	1	4	1	2	2	1	4	3	1	1	2	1	0	17	4	3	1	2	2	1	3	1	1	2	1	4	2	3	2	1	4	4	4	3	1	2	2	1	2	1	2	1
Fall	1	1	1	24	2	4	1	2	3	3	2	2	1	3	2	2	2	22	4	3	1	3	2	1	4	1	3	2	1	3	3	3	2	1	4	1	2	4	3	4	3	1	3	4	2	1
Fall	1	1	1	22	2	4	1	2	2	3	3	3	2	3	3	1	1	23	2	4	1	1	2	1	2	1	1	2	1	3	2	2	2	1	3	1	2	2	3	1	2	2	3	1	2	1
Fall	1	1	1	19	2	2	1	3	3	3	4	1	1	4	3	3	2	27	1	2	1	1	3	3	3	1	1	3	1	2	1	1	3	1	1	1	3	3	3	2	3	2	2	1	3	3
Fall	1	1	1	20	2		1	0	0	1	4	3	0	3	3	0	0	14	1	3	1	1	1	1	2	1	1	1	1	4	3	2	1	1	4	1	2	4	1	2	1	4	1	1	1	1
Fall	1	1	1	19	1	2	1	2	2	2	1	1	0	0	4	0	0	12	2	1	2	1	1	1	2	1	1	2	1	1	1	2	2	1	2	2	1	2	2	2	2	2	2	2	4	2
Fall	1	1	1	20	2	3	1	1	0	0	4	4	0		4	1	0		1	4	1	1	3	1	4	1	1	2	1	1	2	3	3	1	4	2	4	4	4	4	2	4	4	2	2	2
Fall	1	1	1	23	2	4	1	3	4	4	3	1	1	2	2	2	4	26	3	2	3	4	2	1	2	1	3	2	3	2	4	3	2	1	1	2	2	2	3		1	2	3	4		1
Fall	1	1	1	22	2	4	1	2	2	2	2	2	2	2	3	3	2	22	3	2	3	3	3	2	2	3	3	2	3	3	2	2	3	2	3	4	3	2	2	2	2	2	2	1	2	2
Fall	1	1	1	20	2	3	1	0	2	2	4	4	1	4	4	2	1	24	2	3	1	1	1	1	1	1	1	1	1	2	2	2	1	1	3	1	2	1	1	3	2	1	1	1	1	1
Fall	1	1	1	22	1	4	1	2	2	3	3	3	1	2	2	4	3	25	2	3	2	3	2	2	4	1	3	2	3	3	4	3	3	2	3	4	4	4	4	2	2	4	3	4	2	4
Fall	1	1	1	24	2	4	1	1	2	1	4	1	1	2	4	3	2	21	1	3	2	1	4	1	4	1	2	4	1	4	1	4	4	1	1	4	4	4	4	1	2	4	4	1	1	4
Fall	1	1	1	22	2		1	2	1	2	0	2	1	2	2	2	2	16	2	2	2	2	1	2	2	2	1	2	1	1	2	2	2	1	2	2	2	1	2	1	1	1	1	1	1	1
Fall	1	1	1	25	2	4	1	2	2	3	3	2	2	1	2	4	3	24	3	3	1	1	4	1	3	1	1	3	1	2	3	3	3	1	4	2	3	4	3	1	3	3	3	2	1	2
Fall	1	1	1	21	2	4	1	1	2		4	4	2	3	3	2	2		3	2	2	1	3	1	4	1	1	2	1	4	2	3	2	1	4	4	3	3	2	4	3	2	3	2	4	2
Fall	1	1	1		1	4	1	3	2	2	3	2	0	2	4	2	0	20	4	3	1	1	2	1	3	1	2	2	1	3	1	3	2	1	3	2	4	2	2	4	2	1	2	2	4	2
Fall	1	1	1	22	1	4	1	2	1	3	3	2	0	2	3	0	0	16	1	2	1	1	1	1	2	1	1	1	1	2	1	2	1	1	2	1	1	1	1	1	1	1	1	1	1	1
Fall	1	1	1	30	2	3	1	1	2	2	4	2	1	3	3	2	2	22	2	4	1	2	2	1	4	1	2	2	2	2	3	4	3	1	2	4	3	4	2	1	2	4	4	2	1	3
Fall	1	1	1	24	1		1	0	1	2	2	3	3	1	2	2	2	18	3	2	1	1	3	1	4	1	3	3	1	3	1	2	2	1	2	3	4	3	3	1	2	3	3	1	1	1
Fall	1	1	1	20	2	3	1	3	2	3	2	2	2	2	1	3	3	23	3	2	1	1	2	2	3	1	2	2	1	3	2	3	2	1	3	3	3	4	2	2	2	4	4	1	2	1
Fall	1	1	1	21	2	4	1	3	1	3	3	2	0	3	3	1	1	20	2	2	1	1		1	2	1	1	1	1	3	2	3	3	1	2	3	4	3	3	4	3	3	2	1	3	3
Fall	1	1	1	21	2	4	1	0	0	2	1	3	1	2	3	1	1	14	3	2	1	1	2	1	2	1	1	2	1	2	2	1	2	1	2	1	2	3	1	2	2	2	1	1	2	1
Fall	1	1	1	21	2	4	1	3	4	4	2	2	1	1	2	3	1	23
Fall	1	1	1	18	1	2	1	3	2	3	1	3	2	2	3	3	3	25
Fall	1	1	1	20	1	2	1	2	3	4	2	1	2	2	3	2	2	23
Fall	1	1	1	20	1	3	1	1	0	3	3	3	0	2	2	3	1	18
Fall	1	1	1	21	2	4	1	2	0	3	4	2	0	2	3	0	0	16
Fall	1	1	1	25	2	4	1	3	3	3	3	3	3	3	3	4	4	32
Spri	1	1	1	22	1	4	1	3	2	1	2	3	1	3	2	2	1	20	1	2	1	2	1	1	2	1	1	1	3	1	1	2	1	1	1	1	2	1	1	1	1	2	2	4	1	1
Spri	1	1	1	24	1		1	2	3	3	3	3	2	3	3	2	1	25	2	4	1	1	1	1	4	1	2	2	1	4	2	3	1	1	3	4	2	4	1	2	2	2	3	2	2	2
Spri	1	1	1	23	2	4	2	3	4	4	3	2	3	2	0	4	4	29	2	1	4	4	4	4	2	4	4	3	4	4		4	4	4	4	4	4	1	2	2	4	4	2	4	1	4
Spri	1	1	1	20	1	2	1	2	1	1	2	3	2	2	1	2	2	18	4	2	1	1	1	1	2	1	1	2	1	1	2	1	3	1	2	4	4	1	2	1	1	3	3	2	3	4
Spri	1	1	1	22	1		1	0	2	1	3	3	0	3	2	0	2	16	1	3	1	1	2	1	3	1	1	2	1	3	1	3	1	1	3	1	1		2	4	1		3	1	3	1
Spri	1	1	1	21	2	4	1	2	3	3	2	2	3	2	3	1	2	23	3	2	1	3	3	2	2	1	3	3	3	4	4	3	3	1	2	1	3	2	3	2	3	2	3	3	2	1
Spri	1	1	1	24	1	4	1	3	3	3	2	2	2	2	2	2
Spri	1	1	1	22	2	4	1	3	1	3	2	2	1	4	2	2	2	22	4	3	1	1	2	1	4	1	1	2	1	4	3	4	3	1	4	2	1	4	1	3	2	3	4	3	3	1
Spri	1	1	1	22	2	4	1	3	4	4	3	3	3	2	2	3	3	30	3	3	1	2	4	2	4	1	2	4	2	3	3	3	4	1	3	1	4	4	4	1	4	3	3	3	1	1
Spri	1	1	1	21	2	2	1	2	2	3	3	3	2	3	3	2	2	25	4	3	2	1	2	3	3	1	2	2	1	3	1	2	3	1	3	3	2	3	2	1	2	3	2	1	1	1
Spri	1	1	1	18	2	1	1	0	1	2	4	3	2	4	4	1	1	22	2	3	1	1	1	1	3	2	1	1	1	2	1	2	2	1	2	2	2	1	1	1	1	1	2	1	1	2
Spri	1	1	1	19	2	2	1	3	3	2	4	4	1	4	4	2	2	29	2	4	1	1	2	1	4	1	4	2	1	4	2	4	2	1	4	1	4	4	2	1	1	4	4	1	1	1
Spri	1	1	1	21	1	3	1	0	0	0	4	4	0	4	4	0	0	16	3	4	1	1	1	1	3	1	1	3	1	3	1	3	3	1	3	2	3	3	3	2	2	3	3	1	3	3
Spri	1	1	1	20	2	3	1	2	2	4	3	1	3	1	1	4	3	24	2	2	1	2	2	3	3	2	3	2	2	3	3	2	2	3	4	3	3	3	4	1	3	2	2	3	1	2
Spri	1	1	1	18	2		1	3	3	3	3	3	2	2	2	0	4	25	4	3	1	2	1	1	4	1	1	2	2	2	1	4	3	1	1	4	4	4	1	1	2	4	3	1	1	1
Spri	1	1	1	18	2	4	1	0	1	2	4	4	0	4	4	1	0	20	3	3	1	1	2	1	4	1	1	1	1	4	2	2	2	1	3	1	4	3	2	1	2	4	4	1	1	1
Spri	1	1	1	22	2	4	1	2	1	3	3	3	1	4	4	1	2	24	3	3	3	1	4	2	4	3	3	4	1	4	1	4	4	1	3	2	4	4	3	4	4	4	3	1	4	2
Spri	1	1	1	22	1	4	1	4	4	4	4	2	3	1	2	4	4	32	3	2	1	3	2	1	2	1	3	1	2	2	4	3	1	1	1	1	3	3	3	1	1	2	3	3	1	1
Spri	1	1	1	21	2	4	1	2	2	2	4	3	1	2	3	2	0	21	2	3	2	1	4	1	3	1	2	2	1	3	4	2	3	1	2	3	2	4	3	4	2	2	3	3	2	2
Spri	1	1	1	25	2	4	1	2	3	4	3	2	1	2	2	3	2	24	2	2	1	1	3	1	4	2	2	3	2	3	4	3	3	1	4	4	4	3	3	1	4	3	4	2	1	3
Spri	1	1	1	22	2	3	1	4	4	3	3	3	3	3	0	2	2	27	4	3	4	1	2	2	2	1	2	1	1	4	4	1	1	2	3	4	4	2	2	1	4	1	3	4	1	4
Spri	1	1	1	20	2	2	1	0	0	2	4	3	1	3	4	0	0	17	1	1	1	1	1	1	1	1	1	1	1	1	1	1	1	1	1	1	1	1	1	1	1	1	1	1	1	1
Spri	1	1	1	18	2	1	1	2	1	3	3	2	2	2	3	3	2	23	4	3	1		2	1	3	1	3	3		3	3	3	2	1	3	1	1	2	2	2	3	3	2	2	1
Spri	1	1	1	26			.	2	2	4	4	1	1	1	1	2	2	20	2	3	3	1	1	2	2	2	2	2	1	3	3	2	1	2	2	2	4	4	4	4	1	4	4	2	4	1
Spri	1	1	1	19	1	3	1	2	1	2	2	1	2	2	3	2	1	18	2	1	1	1	2	1	1	3	1	2	1	2	2	1	1	3	2	1		1	3	2	1	1	2	4	1	3
Spri	1	1	1	21	1	4	1	3	1	3	4	3	2	3	3	3	1	26	4	4	1	1	4	1	4	1	1	4	1	4	1	4	4	1	4	2	4	2	1	4	4	4	4	1	4	2
[truncated: 22 more columns]
